# Supplementary material for: Transition metal-free synthesis of polyfluoroaryl sulfides via S -transfer reaction
Source: Royal Society of Chemistry journal article supplement (doi:10.1039/d4qo01276c), 2024-01-01

## Supporting Information

### Transition Metal-Free Synthesis of Polyfluoroaryl Sulfides via *S*-Transfer Reaction

Yuhua Wang<sup>a</sup>, Mengqin Liu<sup>a</sup>, Heye Zhou<sup>a</sup>, Tao Qin<sup>\*a</sup>, Bin Liu<sup>\*a,b</sup> and Xing Lu<sup>\*a</sup>

<sup>a</sup>*College of Materials and Chemical Engineering, Key Laboratory of Inorganic Nonmetallic Crystalline and Energy Conversion Materials, China Three Gorges University, Yichang, Hubei 443002, PR China China*

<sup>b</sup>*Hubei Three Gorges Laboratory, Yichang 443007*

*E-mail: qintao@ctgu.edu.cn; liubin1@ctgu.edu.cn; lux@hust.edu.cn.*

## Table of Contents

|                                                                                   |     |
|-----------------------------------------------------------------------------------|-----|
| 1. General Information.....                                                       | S3  |
| 2. Detailed Optimization Studies.....                                             | S4  |
| 3. Experimental Procedures.....                                                   | S6  |
| 4. Analytical data of New Compounds.....                                          | S8  |
| 4. Mechanistic investigation.....                                                 | S18 |
| 5. References.....                                                                | S19 |
| 6. $^1\text{H}$ , $^{13}\text{C}$ , $^{19}\text{F}$ Spectra of New Compounds..... | S20 |

## 1. General Information

All reactions were monitored by thin layer chromatography (TLC) using Macherey-Nagel 0.20 mm silica gel 60 plates. Flash column chromatography was performed on silica gel 60 (particle size 300-400 mesh ASTM, purchased from Taizhou, China).  $^1\text{H}$ ,  $^{13}\text{C}$  spectra were recorded with, Bruker 400 MHz (Avance-400) instrument. All  $^1\text{H}$  NMR data are reported in  $\delta$  units, parts per million (ppm), and were measured relative to the residual proton signal in the deuterated solvent at 7.26 ppm ( $\text{CDCl}_3$ ). All  $^{13}\text{C}$  NMR spectra are decoupled and reported in ppm relative to the solvent signal at 77.16 ppm ( $\text{CDCl}_3$ ). High-resolution mass spectra HRMS (ESI-TOF) were recorded on Bruker microtof. Compounds were visualized by irradiation with UV light, or stained with iodine/silica gel, or potassium permanganate. Preparatory thin-layer chromatography (Prep-TLC) was performed on silica gel GF with UV 254 (20  $\times$  20 cm, 1000 microns, from Yantai Jiang you Silica Gel Development Co., Ltd.) and visualized with UV light.

**Materials.** Reaction solvents THF and toluene were distilled over sodium and stored under nitrogen atmosphere. While DCM, DCE and  $\text{CH}_3\text{CN}$  was distilled over  $\text{CaH}_2$  and stored under nitrogen atmosphere. Compounds **1a-1i** were known and prepared according to the previously reported procedures<sup>[1]</sup>. All other commercial reagents and solvents were purchased from Energy-Chemical Ltd, and used as received unless otherwise noted.

## 2. Detailed Optimization Studies

**Table S1. Screening of base.<sup>a</sup>**

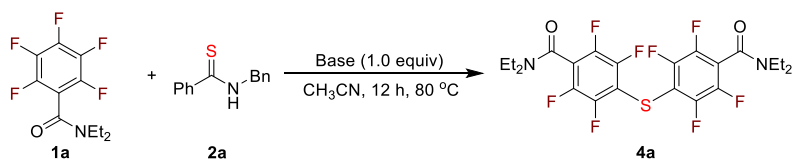

| Entry    | Base                             | Yield <b>4a</b> (%) <sup>b</sup> |
|----------|----------------------------------|----------------------------------|
| <b>1</b> | Cs <sub>2</sub> CO <sub>3</sub>  | 36                               |
| <b>2</b> | K <sub>2</sub> CO <sub>3</sub>   | 22                               |
| <b>3</b> | KHCO <sub>3</sub>                | trace                            |
| <b>4</b> | Na <sub>2</sub> CO <sub>3</sub>  | trace                            |
| <b>5</b> | <sup>t</sup> BuOK                | 28                               |
| <b>6</b> | NaOH                             | 25                               |
| <b>7</b> | <sup>i</sup> Pr <sub>2</sub> EtN | n.d.                             |
| <b>8</b> | DMAP                             | trace                            |
| <b>9</b> | Et <sub>3</sub> N                | n.d.                             |

<sup>a</sup>Reaction conditions: **1a** (0.2 mmol), **2** (0.10 mmol), base (1.0 equiv), solvent (0.2 M), 12 h. <sup>b</sup><sup>19</sup>F NMR yields using fluorobenzene as internal standard.

**Table S2. Screening of solvent.<sup>a</sup>**

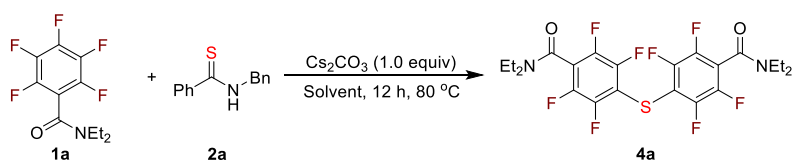

| Entry    | Solvent            | Yield <b>4a</b> (%) <sup>b</sup> |
|----------|--------------------|----------------------------------|
| <b>1</b> | Toluene            | n.d.                             |
| <b>2</b> | DCE                | n.d.                             |
| <b>3</b> | CCl <sub>4</sub>   | n.d.                             |
| <b>4</b> | DMF                | 34                               |
| <b>5</b> | DMSO               | 30                               |
| <b>6</b> | CH <sub>3</sub> CN | 36                               |

<sup>a</sup>Reaction conditions: **1a** (0.2 mmol), **2a** (0.10 mmol), Cs<sub>2</sub>CO<sub>3</sub> (1.0 equiv), solvent (0.2 M), 12 h. <sup>b</sup><sup>19</sup>F NMR yields using fluorobenzene as internal standard.

**Table S3. Screening of sulfur source.<sup>a</sup>**

CCN(CC)C(=O)c1cc(F)c(F)c(F)c1F + "S"  $\xrightarrow[\text{CH}_3\text{CN, 12 h, 80 }^\circ\text{C}]{\text{Cs}_2\text{CO}_3 \text{ (1.0 equiv)}}$  CCN(CC)C(=O)c1cc(F)c(Sc2cc(F)c(F)c(F)c2F)c(F)c1F

**1a**                      **2**                      **4a**

---

c1ccccc1C(=S)Nc2ccccc2    NC(=S)N    CC(=O)SK    CCOC(=S)SK     $\text{K}_2\text{S}$      $\text{Na}_2\text{S}_2\text{O}_3$      $\text{S}_8$

**2a**                      **2b**                      **2c**                      **2d**                      **2e**                      **2f**                      **2g**

| Entry                  | 2         | Yield <b>4a</b> (%) <sup>b</sup> |
|------------------------|-----------|----------------------------------|
| <b>1</b>               | <b>2a</b> | 36                               |
| <b>2</b>               | <b>2b</b> | 43                               |
| <b>3<sup>c</sup></b>   | <b>2c</b> | 65                               |
| <b>4<sup>c,d</sup></b> | <b>2d</b> | 32                               |
| <b>5<sup>c</sup></b>   | <b>2e</b> | 38                               |
| <b>6<sup>c</sup></b>   | <b>2f</b> | trace                            |
| <b>7<sup>c</sup></b>   | <b>2g</b> | n.d.                             |
| <b>8<sup>c,e</sup></b> | <b>2c</b> | 91                               |

<sup>a</sup> Reaction conditions: **1a** (0.2 mmol), **2** (0.10 mmol), Cs<sub>2</sub>CO<sub>3</sub> (1.0 equiv), CH<sub>3</sub>CN (0.2 M), 12 h. <sup>b</sup> <sup>19</sup>F NMR yields using fluorobenzene as internal standard. <sup>c</sup> Without any base. <sup>d</sup> Since potassium ethyl xanthogenate **2d** is sensitive to light the experiments were carried out under dark conditions. <sup>e</sup> **2c** (0.15 mmol).

### 3. Experimental Procedures

#### a) General Procedure for 4

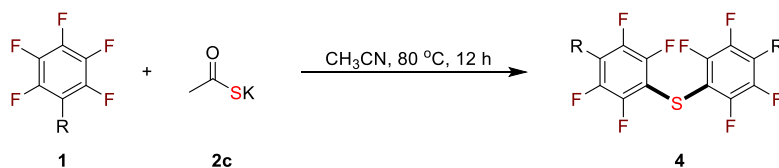

Added polyfluoroarene **1** (0.2 mmol), potassium thioacetate **2c** (17.1 mg, 0.15 mmol, 0.75 equiv) in 1.0 mL of acetonitrile and the mixture was allowed to stir for 12 h at 80 °C. Until the reaction was complete as indicated by TLC. The reaction mixture was then quenched with H<sub>2</sub>O, extracted with CH<sub>2</sub>Cl<sub>2</sub> (3×10 mL) and the combined organic layers were concentrated in vacuo. The resulting crude product was purified by flash column chromatography on silica gel to obtain product **4**.

#### b) General Procedure for 6

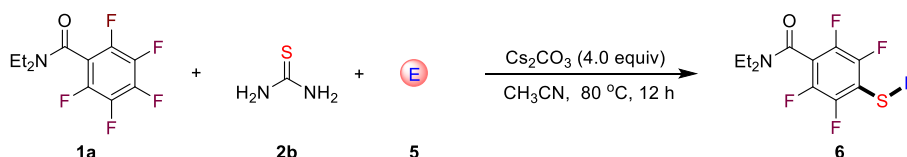

Added *N,N*-diethyl-2,3,4,5,6-pentafluorobenzamide **1a** (53.4 mg, 0.2 mmol, 1.0 equiv), thiourea **2b** (22.8 mg, 0.30 mmol, 1.5 equiv), electrophiles **5** (0.8 mmol, 4.0 equiv) and Cs<sub>2</sub>CO<sub>3</sub> (260 mg, 0.8 mmol, 4.0 equiv) in 2.0 mL of acetonitrile and the mixture was allowed to stir for 12 h at 80 °C. Until the reaction was complete as indicated by TLC. The reaction mixture was then quenched with H<sub>2</sub>O, extracted with CH<sub>2</sub>Cl<sub>2</sub> (3×10 mL) and the combined organic layers were concentrated in vacuo. The resulting crude product was purified by flash column chromatography on silica gel to obtain product **6**.

#### c) A Gram scale synthesis and synthetic applications

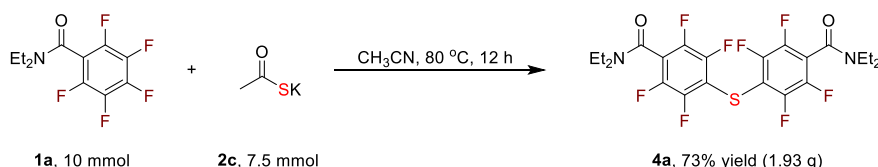

Added *N,N*-diethyl-2,3,4,5,6-pentafluorobenzamide **1a** (2.67g, 10 mmol, 1.0 equiv), and potassium thioacetate **2c** (0.86 g, 7.5 mmol, 0.75 equiv) in 30 mL of acetonitrile, The solution was warmed up to 80 °C and it was stirred for 12 hours, until the reaction was complete as indicated by TLC. The reaction mixture was then quenched with H<sub>2</sub>O, extracted with CH<sub>2</sub>Cl<sub>2</sub> (3×30 mL)

and the combined organic layers were concentrated in vacuo. The resulting crude product was purified by flash column chromatography on silica gel to obtain product **4a** (1.93 g, 73%).

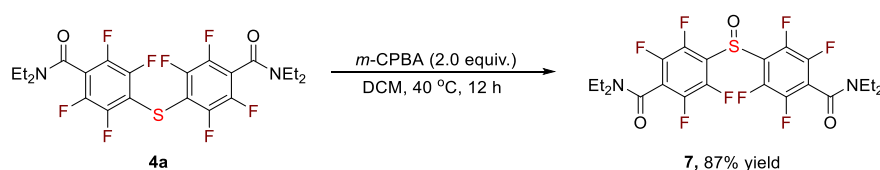

Added **4a** (105.6 mg, 0.2 mmol) and *m*-CPBA (68.8 mg, 0.4 mmol, 2.0 equiv) in 2 mL of DCM and the mixture was allowed to stir for 12 h at 40 °C, until the reaction was complete as indicated by TLC. The reaction mixture was quenched with saturated aq. Na<sub>2</sub>SO<sub>3</sub>, extracted with CH<sub>2</sub>Cl<sub>2</sub> (3×10 mL) and the combined organic layers were concentrated in vacuo. The resulting crude product was purified by flash column chromatography on silica gel to obtain product **7** (94.7 mg, 87%).

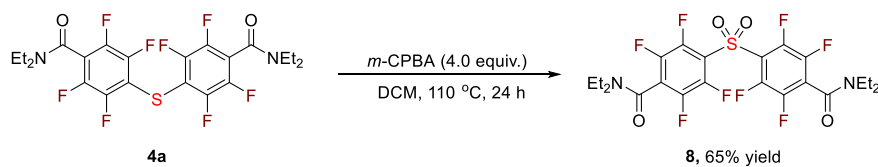

A heavy wall pressure vessel was charged with pentafluorophenyl sulfide (105.6 mg, 0.2 mmol, 1.00 equiv.) and *m*-CPBA (137.6 mg, 0.8 mmol, 4.0 equiv). The mixture was suspended in 2 mL of dichloromethane and the tube was sealed with a Teflon cap and the mixture was allowed to stir for 24 h at 110 °C, until the reaction was complete as indicated by TLC. The reaction mixture was quenched with saturated aq. Na<sub>2</sub>SO<sub>3</sub>, extracted with CH<sub>2</sub>Cl<sub>2</sub> (3×10 mL) and the combined organic layers were concentrated in vacuo. The resulting crude product was purified by flash column chromatography on silica gel to obtain product **8** (72.8 mg, 65%).

## 4. Analytical data of New Compounds

### 4,4'-Thiobis(*N,N*-diethyl-2,3,5,6-tetrafluorobenzamide) (**4a**)

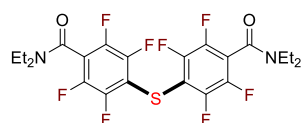

The crude was purified by flash chromatography using Petroleum ether/ Ethyl acetate 10:1 to afford **4a** as colorless oil (96.1 mg, 91% yield), TLC:  $R_f$  = 0.25 (Petroleum ether : Ethyl acetate = 10:1) [UV].

**$^1\text{H}$  NMR** (400 MHz,  $\text{CDCl}_3$ )  $\delta$  3.60 (q,  $J$  = 7.2 Hz, 4H), 3.24 (q,  $J$  = 7.2 Hz, 4H), 1.27 (t,  $J$  = 7.2 Hz, 6H), 1.16 (t,  $J$  = 7.2 Hz, 6H).  **$^{13}\text{C}$  NMR** (100 MHz,  $\text{CDCl}_3$ )  $\delta$  158.0, 147.0 (dm,  $J$  = 251.0 Hz), 142.5 (dm,  $J$  = 238.0 Hz), 118.9 (t,  $J$  = 22.0 Hz), 111.7 (t,  $J$  = 22.0 Hz), 43.4, 40.0, 14.3, 12.8.  **$^{19}\text{F}$  NMR** (376 MHz,  $\text{CDCl}_3$ )  $\delta$  -130.66 – -130.92 (m, 4F), -140.17 – -140.40 (m, 4F). **HRMS** (ESI-TOF) ( $m/z$ ): Calcd for  $\text{C}_{22}\text{H}_{21}\text{F}_8\text{N}_2\text{O}_2\text{S}$  ( $[\text{M} + \text{H}]^+$ ), 529.1191, found, 529.1180.

### 4,4'-Thiobis(2,3,5,6-tetrafluoro-*N,N*-diisopropylbenzamide) (**4b**)

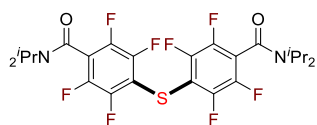

The crude was purified by flash chromatography using Petroleum ether/ Ethyl acetate 10:1 to afford **4b** as colorless oil (85.3 mg, 73% yield), TLC:  $R_f$  = 0.26 (Petroleum ether : Ethyl acetate = 10:1)

[UV].  **$^1\text{H}$  NMR** (400 MHz,  $\text{CDCl}_3$ )  $\delta$  3.73 – 3.64 (m, 2H), 3.61 – 3.52 (m, 2H), 1.54 (d,  $J$  = 6.8 Hz, 12H), 1.21 (d,  $J$  = 6.4 Hz, 12H).  **$^{13}\text{C}$  NMR** (100 MHz,  $\text{CDCl}_3$ )  $\delta$  157.4, 147.1 (dm,  $J$  = 253.0 Hz), 142.4 (dm,  $J$  = 242.0 Hz), 120.1 (t,  $J$  = 46.0 Hz), 111.7 (t,  $J$  = 46.0 Hz), 52.1, 47.0, 21.0, 20.3.  **$^{19}\text{F}$  NMR** (376 MHz,  $\text{CDCl}_3$ )  $\delta$  -130.68 – -130.83 (m, 4F), -141.32 – -141.50 (m, 4F). **HRMS** (ESI-TOF) ( $m/z$ ): Calcd for  $\text{C}_{26}\text{H}_{29}\text{F}_8\text{N}_2\text{O}_2\text{S}$  ( $[\text{M} + \text{H}]^+$ ), 585.1817, found, 585.1813.

### (Thiobis(2,3,5,6-tetrafluoro-4,1-phenylene))bis(piperidin-1-ylmethanone) (**4c**)

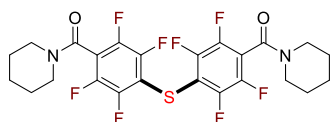

The crude was purified by flash chromatography using Petroleum ether/ Ethyl acetate 15:1 to afford **4c** as colorless oil (88.3 mg, 80% yield), TLC:  $R_f$  = 0.17 (Petroleum ether : Ethyl acetate = 15:1)

[UV].  **$^1\text{H}$  NMR** (400 MHz,  $\text{CDCl}_3$ )  $\delta$  3.75 (t,  $J$  = 5.2 Hz, 4H), 3.34 – 3.24 (m, 4H), 1.74 – 1.55 (m, 12H).  **$^{13}\text{C}$  NMR** (100 MHz,  $\text{CDCl}_3$ )  $\delta$  156.9, 147.0 (dm,  $J$  = 254.0 Hz), 142.5 (dm,  $J$  = 250.0 Hz), 118.4 (t,  $J$  = 22.0 Hz), 111.7 (t,  $J$  = 22.0 Hz), 48.3, 43.3, 26.6, 25.5, 24.4.  **$^{19}\text{F}$  NMR** (376 MHz,  $\text{CDCl}_3$ )  $\delta$  -130.79 – -131.01 (m, 4F), -139.79 – -139.96 (m, 4F). **HRMS** (ESI-TOF) ( $m/z$ ): Calcd for  $\text{C}_{24}\text{H}_{21}\text{F}_8\text{N}_2\text{O}_2\text{S}$  ( $[\text{M} + \text{H}]^+$ ), 553.1191, found, 553.1190.

### (Thiobis(2,3,5,6-tetrafluoro-4,1-phenylene))bis(morpholinomethanone) (**4d**)

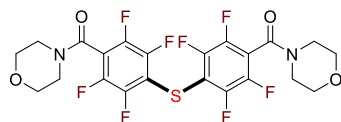

The crude was purified by flash chromatography using Petroleum ether/ Ethyl acetate 10:1 to afford **4d** as colorless oil (85.6 mg, 77% yield), TLC:  $R_f$  = 0.14 (Petroleum ether : Ethyl

acetate = 10:1) [UV].  **$^1\text{H}$  NMR** (400 MHz,  $\text{CDCl}_3$ )  $\delta$  3.86 – 3.77 (m, 8H), 3.72 – 3.67 (m, 4H), 3.35 (t,  $J$  = 5.2 Hz, 4H).  **$^{13}\text{C}$  NMR** (100 MHz,  $\text{CDCl}_3$ )  $\delta$  157.2, 147.0 (dm,  $J$  = 253.0 Hz), 142.6 (dm,  $J$  = 240.0 Hz), 117.3 (t,  $J$  = 22.0 Hz), 112.4 (t,  $J$  = 20.0 Hz), 66.9, 66.7, 47.4, 42.8.  **$^{19}\text{F}$  NMR** (376 MHz,  $\text{CDCl}_3$ )  $\delta$  -130.36 – -130.48 (m, 4F), -139.22 – -139.47 (m, 4F). **HRMS** (ESI-TOF) ( $m/z$ ): Calcd for  $\text{C}_{22}\text{H}_{17}\text{F}_8\text{N}_2\text{O}_4\text{S}$  ( $[\text{M} + \text{H}]^+$ ), 557.0776, found, 557.0769.

#### 4,4'-Thiobis(2,3,5,6-tetrafluoro-*N,N*-diphenylbenzamide) (**4e**)

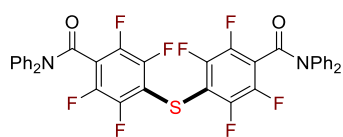

The crude was purified by flash chromatography using Petroleum ether/ Ethyl acetate 15:1 to afford **4e** as colorless oil (129.6 mg, 90% yield), TLC:  $R_f$  = 0.13 (Petroleum ether : Ethyl acetate = 15:1) [UV].  $^1\text{H NMR}$  (400 MHz,  $\text{CDCl}_3$ )  $\delta$  7.43 – 7.37 (m, 8H), 7.31 – 7.20 (m, 12H).  $^{13}\text{C NMR}$  (100 MHz,  $\text{CDCl}_3$ )  $\delta$  158.5, 146.0 (dm,  $J$  = 253.0 Hz), 142.0 (dm,  $J$  = 244.0 Hz), 119.4 (t,  $J$  = 21.0 Hz), 112.2 (t,  $J$  = 20.0 Hz), 126.0, 119.6, 119.4, 112.4, 112.2, 112.0.  $^{19}\text{F NMR}$  (376 MHz,  $\text{CDCl}_3$ )  $\delta$  -132.27 – -132.40 (m, 4F), -139.10 – -139.29 (m, 4F). **HRMS** (ESI-TOF) ( $m/z$ ): Calcd for  $\text{C}_{38}\text{H}_{21}\text{F}_8\text{N}_2\text{O}_2\text{S}$  ( $[\text{M} + \text{H}]^+$ ), 721.1191, found, 721.1187.

#### Dimethyl 4,4'-thiobis(2,3,5,6-tetrafluorobenzoate) (**4f**)

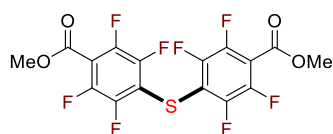

The crude was purified by flash chromatography using Petroleum ether/ Ethyl acetate 15:1 to afford **4f** as colorless oil (82.9 mg, 93% yield), TLC:  $R_f$  = 0.16 (Petroleum ether : Ethyl acetate = 15:1) [UV].  $^1\text{H NMR}$  (400 MHz,  $\text{CDCl}_3$ )  $\delta$  3.98 (s, 6H).  $^{13}\text{C NMR}$  (100 MHz,  $\text{CDCl}_3$ )  $\delta$  159.6, 146.6 (dm,  $J$  = 253.0 Hz), 144.7 (dm,  $J$  = 259.0 Hz), 114.2 (t,  $J$  = 20.0 Hz), 114.1 (t,  $J$  = 16.0 Hz), 53.6.  $^{19}\text{F NMR}$  (376 MHz,  $\text{CDCl}_3$ )  $\delta$  -131.90 – -132.08 (m, 4F), -137.63 – -137.79 (m, 4F). **HRMS** (ESI-TOF) ( $m/z$ ): Calcd for  $\text{C}_{16}\text{H}_6\text{F}_8\text{O}_6\text{S}$  ( $[\text{M}]^+$ ), 445.9859, found, 445.9866.

#### Diethyl 4,4'-thiobis(2,3,5,6-tetrafluorobenzoate) (**4g**)

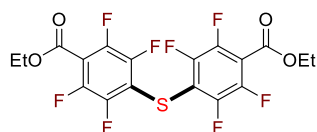

The crude was purified by flash chromatography using Petroleum ether/ Ethyl acetate 15:1 to afford **4g** as colorless oil (76.8 mg, 81% yield), TLC:  $R_f$  = 0.14 (Petroleum ether : Ethyl acetate = 15:1) [UV].  $^1\text{H NMR}$  (400 MHz,  $\text{CDCl}_3$ )  $\delta$  4.45 (q,  $J$  = 7.2 Hz, 4H), 1.40 (t,  $J$  = 7.2 Hz, 6H).  $^{13}\text{C NMR}$  (100 MHz,  $\text{CDCl}_3$ )  $\delta$  159.1, 146.6 (dm,  $J$  = 250.5 Hz), 144.6 (dm,  $J$  = 258.0 Hz), 114.6 (t,  $J$  = 16.5 Hz), 114.0 (t,  $J$  = 18.0 Hz), 63.3, 14.2.  $^{19}\text{F NMR}$  (376 MHz,  $\text{CDCl}_3$ )  $\delta$  -131.87 – -132.08 (m, 4F), -137.85 – -138.13 (m, 4F). **HRMS** (ESI-TOF) ( $m/z$ ): Calcd for  $\text{C}_{18}\text{H}_{10}\text{F}_8\text{O}_4\text{S}$  ( $[\text{M}]^+$ ), 474.0172, found, 474.0178.

#### Diisopropyl 4,4'-thiobis(2,3,5,6-tetrafluorobenzoate) (**4h**)

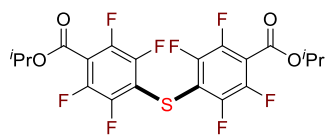

The crude was purified by flash chromatography using Petroleum ether/ Ethyl acetate 15:1 to afford **4h** as colorless oil (89.4 mg, 89% yield), TLC:  $R_f$  = 0.15 (Petroleum ether : Ethyl acetate = 15:1) [UV].  $^1\text{H NMR}$  (400 MHz,  $\text{CDCl}_3$ )  $\delta$  5.32 – 5.28 (m, 2H), 1.37 (d,  $J$  = 6.4 Hz, 12H).  $^{13}\text{C NMR}$  (100 MHz,  $\text{CDCl}_3$ )  $\delta$  158.6, 146.8 (dm,  $J$  = 248.0 Hz), 144.4 (dm,  $J$  = 257.0 Hz), 115.1 (t,  $J$  = 16.5 Hz), 113.7 (t,  $J$  = 20.0 Hz), 71.6, 21.8.  $^{19}\text{F NMR}$  (376 MHz,  $\text{CDCl}_3$ )  $\delta$  -132.02 – -132.19 (m, 4F), -138.42 – -138.58 (m, 4F). **HRMS** (ESI-TOF) ( $m/z$ ): Calcd for  $\text{C}_{20}\text{H}_{14}\text{F}_8\text{O}_4\text{S}$  ( $[\text{M}]^+$ ), 502.0485, found, 502.0492.

#### Dicyclohexyl 4,4'-thiobis(2,3,5,6-tetrafluorobenzoate) (**4i**)

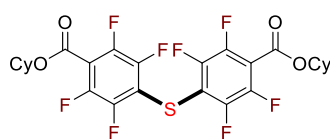

The crude was purified by flash chromatography using Petroleum ether/ Ethyl acetate 15:1 to afford **4i** as colorless oil (84.9 mg, 73% yield), TLC:  $R_f = 0.17$  (Petroleum ether : Ethyl acetate = 15:1)

[UV].  $^1\text{H NMR}$  (400 MHz,  $\text{CDCl}_3$ )  $\delta$  5.15 – 5.07 (m, 2H), 2.01 – 1.90 (m, 4H), 1.82 – 1.73 (m, 4H), 1.67 – 1.53 (m, 6H), 1.48 – 1.30 (m, 6H).  $^{13}\text{C NMR}$  (100 MHz,  $\text{CDCl}_3$ )  $\delta$  158.5, 146.6 (dm,  $J = 250.0$  Hz), 144.5 (dm,  $J = 257.5$  Hz), 115.1 (t,  $J = 17.0$  Hz), 113.7 (t,  $J = 19.5$  Hz), 76.1, 31.4, 25.3, 23.4.  $^{19}\text{F NMR}$  (376 MHz,  $\text{CDCl}_3$ )  $\delta$  -132.04 – -132.26 (m, 4F), -138.29 – -138.47 (m, 4F). **HRMS** (ESI-TOF) ( $m/z$ ): Calcd for  $\text{C}_{26}\text{H}_{22}\text{F}_8\text{O}_4\text{S}$  ( $[\text{M}]^+$ ), 582.1111, found, 582.1105.

#### 1,1'-(Thiobis(2,3,5,6-tetrafluoro-4,1-phenylene))bis(ethan-1-one) (**4j**)

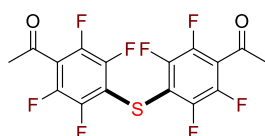

The crude was purified by flash chromatography using Petroleum ether/ Ethyl acetate 15:1 to afford **4j** as colorless oil (51.5 mg, 62% yield), TLC:  $R_f = 0.15$  (Petroleum ether : Ethyl acetate = 15:1) [UV].

$^1\text{H NMR}$  (400 MHz,  $\text{CDCl}_3$ )  $\delta$  2.64 (s, 6H).  $^{13}\text{C NMR}$  (100 MHz,  $\text{CDCl}_3$ )  $\delta$  191.5, 146.7 (dm,  $J = 250.0$  Hz), 143.9 (dm,  $J = 241.0$  Hz), 121.0 (t,  $J = 17.5$  Hz), 113.8 (t,  $J = 20.0$  Hz), 32.5.  $^{19}\text{F NMR}$  (376 MHz,  $\text{CDCl}_3$ )  $\delta$  -131.48 – -131.84 (m, 4F), -140.00 – -140.16 (m, 4F). **HRMS** (ESI-TOF) ( $m/z$ ): Calcd for  $\text{C}_{16}\text{H}_5\text{F}_8\text{O}_2\text{S}$  ( $[\text{M} - \text{H}]^-$ ), 412.9888, found, 412.9886.

#### Bis(2,3,5,6-tetrafluoro-4-(trifluoromethyl)phenyl)sulfane (**4k**)

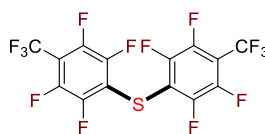

The crude was purified by flash chromatography using Petroleum ether/ Ethyl acetate 50:1 to afford **4k** as colorless oil (55.0 mg, 59% yield), TLC:  $R_f = 0.14$  (Petroleum ether : Ethyl acetate = 50:1) [UV].

$^{13}\text{C NMR}$  (100 MHz,  $\text{CDCl}_3$ )  $\delta$  146.9 (dm,  $J = 250.0$  Hz), 144.0 (dm,  $J = 211.0$  Hz), 120.6 (d,  $J = 275.0$  Hz), 115.4 (t,  $J = 17.5$  Hz), 111.3 (t,  $J = 20.0$  Hz).  $^{19}\text{F NMR}$  (376 MHz,  $\text{CDCl}_3$ )  $\delta$  -56.48 (t,  $J = 21.8$  Hz, 6F), -130.63 – -130.72 (m, 4F), -138.10 – -138.28 (m, 4F). **HRMS** (ESI-TOF) ( $m/z$ ): Calcd for  $\text{C}_{14}\text{F}_{14}\text{S}$  ( $[\text{M}]^+$ ), 465.9497, found, 465.9496.

#### 4,4'-Thiobis(2,3,5,6-tetrafluorobenzonitrile) (**4l**)

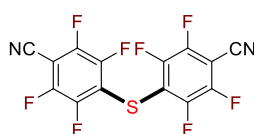

The crude was purified by flash chromatography using Petroleum ether/ Ethyl acetate 40:1 to afford **4l** as colorless oil (46.3 mg, 61% yield),

TLC:  $R_f = 0.15$  (Petroleum ether : Ethyl acetate = 40:1) [UV].  $^{13}\text{C}$

$\text{NMR}$  (100 MHz,  $\text{CDCl}_3$ )  $\delta$  147.2 (dm,  $J = 263.3$  Hz), 146.4 (dm,  $J = 250.0$  Hz), 117.5 (t,  $J = 19.4$  Hz), 106.8, 96.2 (t,  $J = 17.1$  Hz).  $^{19}\text{F NMR}$  (376 MHz,  $\text{CDCl}_3$ )  $\delta$  -129.30 – -129.45 (m, 4F), -129.86 – -130.02 (m, 4F). **HRMS** (ESI-TOF) ( $m/z$ ): Calcd for  $\text{C}_{14}\text{F}_8\text{N}_2\text{S}$  ( $[\text{M}]^+$ ), 379.9654, found, 379.9658.

#### Bis(perfluoropyridin-4-yl)sulfane (**4m**)

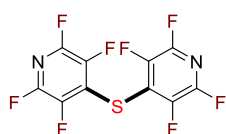

The crude was purified by flash chromatography using Petroleum ether/ Ethyl acetate 30:1 to afford **4m** as colorless oil (29.9 mg, 45% yield), TLC:

$R_f = 0.14$  (Petroleum ether : Ethyl acetate = 30:1) [UV].  $^{13}\text{C NMR}$  (100

MHz,  $\text{CDCl}_3$ )  $\delta$  143.6 (dm,  $J = 246.0$  Hz), 141.3 (dm,  $J = 261.0$  Hz), 123.9 (t,  $J = 17.5$  Hz).  $^{19}\text{F}$

**NMR** (376 MHz, CDCl<sub>3</sub>)  $\delta$  -87.54 – -87.71 (m, 4F), -134.75 – -135.00 (m, 4F). **HRMS** (ESI-TOF) (m/z): Calcd for C<sub>10</sub>F<sub>8</sub>N<sub>2</sub>S ([M]<sup>+</sup>), 331.9654, found, 331.9659.

**Bis(perfluoro-[1,1'-biphenyl]-4-yl)sulfane (4n)**

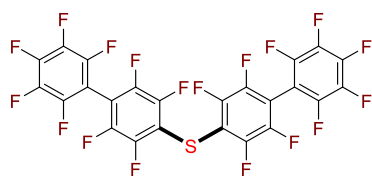

The crude was purified by flash chromatography using Petroleum ether/ Ethyl acetate 50:1 to afford **4n** as colorless oil (70.0 mg, 56% yield), TLC: R<sub>f</sub> = 0.21 (Petroleum ether : Ethyl acetate = 50:1) [UV]. **<sup>13</sup>C NMR** (100 MHz, CDCl<sub>3</sub>)  $\delta$  147.0 (dm, *J* = 250.0 Hz), 144.5 (dm, *J* = 253.0 Hz), 144.1 (m), 141.6 (m), 138.1 (dm, *J* = 249.0 Hz), 113.3 (t, *J* = 20.5 Hz), 108.3 (t, *J* = 18.0 Hz), 102.0 (t, *J* = 19.0 Hz). **<sup>19</sup>F NMR** (376 MHz, CDCl<sub>3</sub>)  $\delta$  -131.54 – -131.68 (m, 4F), -136.10 – -136.29 (m, 4F), -136.77 – -136.98 (m, 4F), -149.14 – -149.28 (m, 2F), -159.95 – -160.13 (m, 4F). **HRMS** (ESI-TOF) (m/z): Calcd for C<sub>24</sub>F<sub>18</sub>S ([M + H]<sup>+</sup>), 661.9433, found, 661.9430.

**Bis(2-fluoro-4-nitrophenyl)sulfane (4o)**

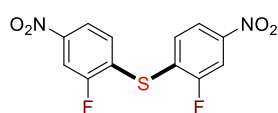

The crude was purified by flash chromatography using Petroleum ether/ Ethyl acetate 70:1 to afford **4o** as colorless oil (28.1 mg, 45% yield), TLC: R<sub>f</sub> = 0.15 (Petroleum ether : Ethyl acetate = 70:1) [UV]. **<sup>1</sup>H NMR** (400 MHz, CDCl<sub>3</sub>)  $\delta$  8.10 – 7.98 (m, 4H), 7.49 – 7.42 (m, 2H). **<sup>13</sup>C NMR** (100 MHz, CDCl<sub>3</sub>)  $\delta$  160.4 (d, *J* = 252.0 Hz), 148.7 (d, *J* = 8.0 Hz), 133.0, 128.5 (d, *J* = 18.0 Hz), 120.1 (d, *J* = 3.0 Hz), 112.2 (d, *J* = 27.0 Hz). **<sup>19</sup>F NMR** (376 MHz, CDCl<sub>3</sub>)  $\delta$  -103.16 (s, 2F). **HRMS** (ESI-TOF) (m/z): Calcd for C<sub>12</sub>H<sub>6</sub>F<sub>2</sub>N<sub>2</sub>O<sub>4</sub>S ([M + H]<sup>+</sup>), 312.0016, found, 312.0011.

**Bis(3-fluoro-4-nitrophenyl)sulfane (4p)**

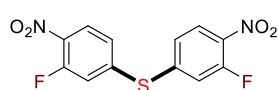

The crude was purified by flash chromatography using Petroleum ether/ Ethyl acetate 70:1 to afford **4p** as colorless oil (25.6 mg, 41% yield), TLC: R<sub>f</sub> = 0.16 (Petroleum ether : Ethyl acetate = 70:1) [UV]. **<sup>1</sup>H NMR** (400 MHz, CDCl<sub>3</sub>)  $\delta$  8.24 (dd, *J* = 9.2, 5.2 Hz, 2H), 7.21 (ddd, *J* = 9.2, 7.2, 2.8 Hz, 2H), 6.99 (dd, *J* = 8.4, 2.8 Hz, 2H). **<sup>13</sup>C NMR** (100 MHz, CDCl<sub>3</sub>)  $\delta$  164.8 (d, *J* = 259.0 Hz), 145.5 (d, *J* = 2.0 Hz), 134.5 (d, *J* = 9.0 Hz), 128.6 (d, *J* = 10.0 Hz), 120.5 (d, *J* = 25.0 Hz), 116.5 (d, *J* = 23.0 Hz). **<sup>19</sup>F NMR** (376 MHz, CDCl<sub>3</sub>)  $\delta$  -101.49 (s, 2F). **HRMS** (ESI-TOF) (m/z): Calcd for C<sub>12</sub>H<sub>6</sub>F<sub>2</sub>N<sub>2</sub>O<sub>4</sub>S ([M + H]<sup>+</sup>), 312.0016, found, 312.0010.

**Dimethyl 4,4'-thiobis(3,5-difluorobenzoate) (4q)**

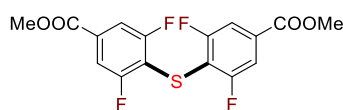

The crude was purified by flash chromatography using Petroleum ether/ Ethyl acetate 60:1 to afford **4q** as colorless oil (33.0 mg, 37% yield), TLC: R<sub>f</sub> = 0.16 (Petroleum ether : Ethyl acetate = 60:1) [UV]. **<sup>1</sup>H NMR** (400 MHz, CDCl<sub>3</sub>)  $\delta$  7.57 (d, *J* = 7.2 Hz, 4H), 3.93 (s, 6H). **<sup>13</sup>C NMR** (100 MHz, CDCl<sub>3</sub>)  $\delta$  164.6, 162.0 (dm, *J* = 247.0 Hz), 132.6 (t, *J* = 10.0 Hz), 113.6, 112.8, 53.0. **<sup>19</sup>F NMR** (376 MHz, CDCl<sub>3</sub>)  $\delta$  -103.73 (s, 4F). **HRMS** (ESI-TOF) (m/z): Calcd for C<sub>16</sub>H<sub>6</sub>F<sub>8</sub>O<sub>4</sub>S ([M]<sup>+</sup>), 445.9859, found, 445.9850.

#### Bis(2,3,5,6-tetrafluorophenyl)sulfane (4r)

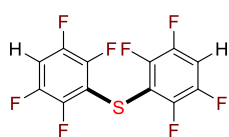

The crude was purified by flash chromatography using Petroleum ether/Ethyl acetate 100:1 to afford **4r** as colorless oil (25.0 mg, 38% yield), TLC:  $R_f$  = 0.31 (Petroleum ether : Ethyl acetate = 100:1) [UV].  $^1\text{H NMR}$  (400 MHz, Chloroform-*d*)  $\delta$  7.21 – 7.05 (m, 2H).  $^{13}\text{C NMR}$  (100 MHz, Chloroform-*d*)  $\delta$  146.8 (dm,  $J$  = 244.7 Hz), 146.1 (dm,  $J$  = 245.5 Hz), 112.1 (t,  $J$  = 21.9 Hz), 107.7 (t,  $J$  = 22.8 Hz).  $^{19}\text{F NMR}$  (376 MHz, Chloroform-*d*)  $\delta$  -133.16 – -133.26 (m, 4F), -137.13 – -137.24 (m, 4F). **HRMS** (ESI-TOF) ( $m/z$ ): Calcd for  $\text{C}_{12}\text{H}_2\text{F}_8\text{S}$  ( $[\text{M}]^+$ ), 329.9749, found, 329.9738.

#### 4-(Benzylthio)-*N,N*-diethyl-2,3,5,6-tetrafluorobenzamide (6a)

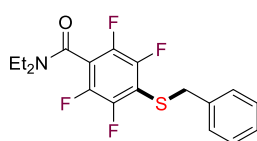

The crude was purified by flash chromatography using Petroleum ether/Ethyl acetate 50:1 to afford **6a** as colorless oil (60.8 mg, 82% yield), TLC:  $R_f$  = 0.15 (Petroleum ether : Ethyl acetate = 50:1) [UV].  $^1\text{H NMR}$  (400 MHz,  $\text{CDCl}_3$ )  $\delta$  7.32 – 7.14 (m, 5H), 4.14 (s, 2H), 3.57 (q,  $J$  = 8.0 Hz, 2H), 3.15 (q,  $J$  = 8.0 Hz, 2H), 1.25 (t,  $J$  = 8.0 Hz, 3H), 1.09 (t,  $J$  = 8.0 Hz, 3H).  $^{13}\text{C NMR}$  (100 MHz,  $\text{CDCl}_3$ )  $\delta$  158.4, 147.0 (dm,  $J$  = 246.5 Hz), 142.2 (dm,  $J$  = 248.0 Hz), 136.2, 128.9, 128.7, 127.9, 116.9 (t,  $J$  = 22.5 Hz), 114.9 (t,  $J$  = 20.5 Hz), 43.3, 39.8, 38.8, 14.1, 12.8.  $^{19}\text{F NMR}$  (376 MHz,  $\text{CDCl}_3$ )  $\delta$  -131.65 – -131.88 (m, 2F), -141.73 – -142.04 (m, 2F). **HRMS** (ESI-TOF) ( $m/z$ ): Calcd for  $\text{C}_{18}\text{H}_{18}\text{F}_4\text{NOS}$  ( $[\text{M}+\text{H}]^+$ ), 372.1040, found, 372.1049.

#### 4-((4-Bromobenzyl)thio)-*N,N*-diethyl-2,3,5,6-tetrafluorobenzamide (6b)

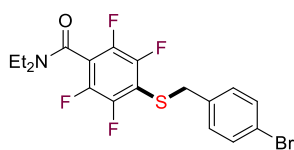

The crude was purified by flash chromatography using Petroleum ether/Ethyl acetate 50:1 to afford **6b** as colorless oil (70.9 mg, 79% yield), TLC:  $R_f$  = 0.14 (Petroleum ether : Ethyl acetate = 50:1) [UV].  $^1\text{H NMR}$  (400 MHz,  $\text{CDCl}_3$ )  $\delta$  7.31 (d,  $J$  = 8.4 Hz, 2H), 7.06 (d,  $J$  = 8.4 Hz, 2H), 4.02 (s, 2H), 3.50 (q,  $J$  = 7.2 Hz, 2H), 3.07 (q,  $J$  = 7.2 Hz, 2H), 1.18 (t,  $J$  = 7.2 Hz, 3H), 1.03 (t,  $J$  = 7.2 Hz, 3H).  $^{13}\text{C NMR}$  (100 MHz,  $\text{CDCl}_3$ )  $\delta$  158.3, 147.0 (dm,  $J$  = 260.0 Hz), 142.3 (dm,  $J$  = 237.0 Hz), 135.4, 131.8, 130.6, 121.9, 117.1 (t,  $J$  = 23.0 Hz), 114.5 (t,  $J$  = 21.0 Hz), 43.3, 39.9, 38.1, 14.1, 12.8.  $^{19}\text{F NMR}$  (376 MHz,  $\text{CDCl}_3$ )  $\delta$  -131.55 – -131.87 (m, 2F), -141.33 – -141.64 (m, 2F). **HRMS** (ESI-TOF) ( $m/z$ ): Calcd for  $\text{C}_{18}\text{H}_{17}\text{BrF}_4\text{NOS}$  ( $[\text{M}+\text{H}]^+$ ), 450.0145, found, 450.0146.

#### *N,N*-diethyl-2,3,5,6-tetrafluoro-4-((4-(4,4,5,5-tetramethyl-1,3,2-dioxaborolan-2-yl)benzyl)thio)benzamide (6c)

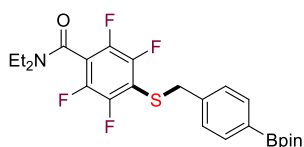

The crude was purified by flash chromatography using Petroleum ether/Ethyl acetate 15:1 to afford **6c** as colorless oil (70.6 mg, 71% yield), TLC:  $R_f$  = 0.15 (Petroleum ether : Ethyl acetate = 30:1) [UV].  $^1\text{H NMR}$  (400 MHz,  $\text{CDCl}_3$ )  $\delta$  7.62 (d,  $J$  = 7.6 Hz, 2H), 7.18 (d,  $J$  = 7.6 Hz, 2H), 4.07 (s, 2H), 3.50 (q,  $J$  = 6.8 Hz, 2H), 3.05 (q,  $J$  = 7.2 Hz, 2H), 1.26 (s, 12H), 1.17 (t,  $J$  = 6.8 Hz, 4H), 1.02 (t,  $J$  = 7.2 Hz, 3H).  $^{13}\text{C NMR}$  (100 MHz,  $\text{CDCl}_3$ )  $\delta$  158.5, 147.0 (dm,  $J$  = 261.0 Hz), 142.3 (dm,  $J$  = 261.0 Hz), 139.4, 135.2, 128.3, 116.9 (t,  $J$  = 22.5 Hz), 114.8 (t,

$J = 20.0$  Hz), 84.0, 43.3, 39.9, 38.8, 25.0, 14.1, 12.9.  **$^{19}\text{F}$  NMR** (376 MHz,  $\text{CDCl}_3$ )  $\delta$  -131.53 – -131.84 (m, 2F), -141.63 – -142.00 (m, 2F). **HRMS** (ESI-TOF) ( $m/z$ ): Calcd for  $\text{C}_{24}\text{H}_{29}\text{BF}_4\text{NO}_3\text{S}$  ( $[\text{M}+\text{H}]^+$ ), 498.1892, found, 498.1890.

***N,N*-diethyl-2,3,5,6-tetrafluoro-4-(methylthio)benzamide (6d)**

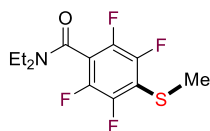

The crude was purified by flash chromatography using Petroleum ether/ Ethyl acetate 50:1 to afford **6d** as colorless oil (53.7 mg, 91% yield), TLC:  $R_f = 0.16$  (Petroleum ether : Ethyl acetate = 50:1) [UV].  **$^1\text{H}$  NMR** (400 MHz,  $\text{CDCl}_3$ )  $\delta$  3.58 (q,  $J = 6.8$  Hz, 2H), 3.23 (q,  $J = 7.2$  Hz, 2H), 2.53 (s, 3H), 1.26 (t,  $J = 7.2$  Hz, 3H), 1.13 (t,  $J = 7.2$  Hz, 3H).  **$^{13}\text{C}$  NMR** (100 MHz,  $\text{CDCl}_3$ )  $\delta$  158.6, 146.5 (dm,  $J = 247.0$  Hz), 142.5 (dm,  $J = 237.0$  Hz), 117.5 (t,  $J = 20.0$  Hz), 116.2 (t,  $J = 22.0$  Hz), 43.4, 39.8, 17.7, 14.2, 12.9.  **$^{19}\text{F}$  NMR** (376 MHz,  $\text{CDCl}_3$ )  $\delta$  -133.25 – -133.53 (m, 2F), -141.83 – -142.08 (m, 2F). **HRMS** (ESI-TOF) ( $m/z$ ): Calcd for  $\text{C}_{12}\text{H}_{14}\text{F}_4\text{NOS}$  ( $[\text{M}+\text{H}]^+$ ), 296.0727, found, 296.0720.

**4-(Butylthio)-*N,N*-diethyl-2,3,5,6-tetrafluorobenzamide (6e)**

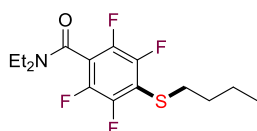

The crude was purified by flash chromatography using Petroleum ether/ Ethyl acetate 50:1 to afford **6e** as colorless oil (46.5 mg, 69% yield), TLC:  $R_f = 0.15$  (Petroleum ether : Ethyl acetate = 50:1) [UV].  **$^1\text{H}$  NMR** (400 MHz,  $\text{CDCl}_3$ )  $\delta$  3.60 (q,  $J = 7.2$  Hz, 2H), 3.52 (t,  $J = 7.4$  Hz, 2H), 3.24 (q,  $J = 7.2$  Hz, 2H), 1.80 – 1.69 (m, 2H), 1.52 – 1.39 (m, 2H), 1.27 (t,  $J = 7.2$  Hz, 3H), 1.16 (t,  $J = 7.2$  Hz, 3H), 0.97 (t,  $J = 7.4$  Hz, 3H).  **$^{13}\text{C}$  NMR** (100 MHz,  $\text{CDCl}_3$ )  $\delta$  157.8, 142.9 (dm,  $J = 258.0$  Hz), 135.7 (dm,  $J = 250.0$  Hz), 118.9 (t,  $J = 22.0$  Hz), 116.4 (t,  $J = 21.0$  Hz), 54.8, 43.5, 40.0, 30.0, 19.4, 14.2, 13.7, 12.9.  **$^{19}\text{F}$  NMR** (376 MHz,  $\text{CDCl}_3$ )  $\delta$  -140.20 – -140.48 (m, 2F), -144.56 – -144.80 (m, 2F). **HRMS** (ESI-TOF) ( $m/z$ ): Calcd for  $\text{C}_{15}\text{H}_{20}\text{F}_4\text{NOS}$  ( $[\text{M}+\text{H}]^+$ ), 338.1196, found, 338.1190.

***N,N*-diethyl-2,3,5,6-tetrafluoro-4-(hexylthio)benzamide (6f)**

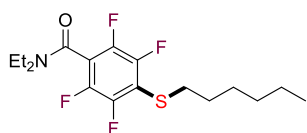

The crude was purified by flash chromatography using Petroleum ether/ Ethyl acetate 50:1 to afford **6f** as colorless oil (60.6 mg, 83% yield), TLC:  $R_f = 0.15$  (Petroleum ether : Ethyl acetate = 50:1) [UV].  **$^1\text{H}$  NMR** (400 MHz,  $\text{CDCl}_3$ )  $\delta$  3.58 (q,  $J = 7.2$  Hz, 2H), 3.23 (q,  $J = 7.2$  Hz, 2H), 2.93 (t,  $J = 7.4$  Hz, 2H), 1.63 – 1.50 (m, 2H), 1.45 – 1.33 (m, 2H), 1.30 – 1.19 (m, 7H), 1.12 (t,  $J = 7.2$  Hz, 3H), 0.87 (t,  $J = 6.8$  Hz, 3H).  **$^{13}\text{C}$  NMR** (100 MHz,  $\text{CDCl}_3$ )  $\delta$  158.6, 147.0 (dm,  $J = 246.0$  Hz), 142.3 (dm,  $J = 263.0$  Hz), 116.4 (t,  $J = 22.0$  Hz), 116.1 (t,  $J = 20.5$  Hz), 43.4, 39.8, 34.8, 31.3, 29.9, 28.2, 22.6, 14.1, 14.1, 12.9.  **$^{19}\text{F}$  NMR** (376 MHz,  $\text{CDCl}_3$ )  $\delta$  -132.33 – -132.71 (m, 2F), -141.76 – -142.09 (m, 2F). **HRMS** (ESI-TOF) ( $m/z$ ): Calcd for  $\text{C}_{17}\text{H}_{24}\text{F}_4\text{NOS}$  ( $[\text{M}+\text{H}]^+$ ), 366.1509, found, 366.1510.

***N,N*-diethyl-2,3,5,6-tetrafluoro-4-(octylthio)benzamide (6g)**

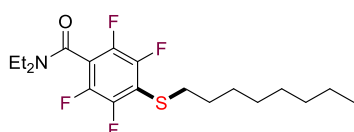

The crude was purified by flash chromatography using Petroleum ether/ Ethyl acetate 60:1 to afford **6g** as colorless oil (70.7 mg, 90% yield), TLC:  $R_f = 0.15$  (Petroleum ether : Ethyl acetate = 60:1) [UV].  **$^1\text{H}$  NMR** (400 MHz,  $\text{CDCl}_3$ )  $\delta$  3.57 (q,  $J = 7.2$  Hz, 2H), 3.22 (q,  $J = 7.2$  Hz,

2H), 2.92 (t,  $J = 7.4$  Hz, 2H), 1.61 – 1.49 (m, 2H), 1.44 – 1.32 (m, 2H), 1.28 – 1.21 (m, 11H), 1.12 (t,  $J = 7.2$  Hz, 3H), 0.85 (t,  $J = 6.8$  Hz, 3H).  $^{13}\text{C}$  NMR (100 MHz,  $\text{CDCl}_3$ )  $\delta$  158.5, 146.9 (dm,  $J = 245.5$  Hz), 142.2 (dm,  $J = 249.0$  Hz), 116.3 (t,  $J = 22.0$  Hz), 116.0 (t,  $J = 20.5$  Hz), 43.2, 39.7, 34.7, 31.7, 29.8, 29.1, 29.0, 28.4, 22.6, 14.1, 14.0, 12.7.  $^{19}\text{F}$  NMR (376 MHz,  $\text{CDCl}_3$ )  $\delta$  -132.38 – -132.68 (m, 2F), -141.80 – -142.08 (m, 2F). HRMS (ESI-TOF) ( $m/z$ ): Calcd for  $\text{C}_{19}\text{H}_{28}\text{F}_4\text{NOS}$  ( $[\text{M}+\text{H}]^+$ ), 394.1822, found, 394.1824.

#### 2,3,5,6-Tetrafluoro-4-(pentan-3-ylthio)-*N,N*-diphenylbenzamide (6h)

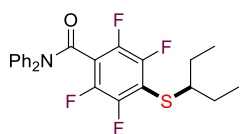

The crude was purified by flash chromatography using Petroleum ether/Ethyl acetate 60:1 to afford **6h** as colorless oil (51.9 mg, 74% yield), TLC:  $R_f = 0.17$  (Petroleum ether : Ethyl acetate = 60:1) [UV].  $^1\text{H}$  NMR (400 MHz,  $\text{CDCl}_3$ )  $\delta$  7.44 – 7.22 (m, 10H), 3.14 – 3.03 (m, 1H), 1.59 – 1.38 (m, 4H), 0.94 (t,  $J = 7.4$  Hz, 6H).  $^{13}\text{C}$  NMR (100 MHz,  $\text{CDCl}_3$ )  $\delta$  159.3, 147.0 (dm,  $J = 245.0$  Hz), 141.9 (dm,  $J = 248.0$  Hz), 141.3, 141.3, 129.6, 129.4, 128.7, 127.9, 127.3, 126.1, 117.7 (t,  $J = 21.0$  Hz), 116.2 (t,  $J = 21.0$  Hz), 53.3, 27.1, 10.9.  $^{19}\text{F}$  NMR (376 MHz,  $\text{CDCl}_3$ )  $\delta$  -131.69 – -132.04 (m, 2F), -140.40 – -140.76 (m, 2F). HRMS (ESI-TOF) ( $m/z$ ): Calcd for  $\text{C}_{24}\text{H}_{22}\text{F}_4\text{NOS}$  ( $[\text{M}+\text{H}]^+$ ), 448.1353, found, 448.1350.

#### 4-(Allylthio)-*N,N*-diethyl-2,3,5,6-tetrafluorobenzamide (6i)

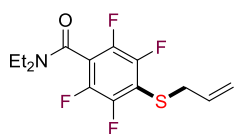

The crude was purified by flash chromatography using Petroleum ether/Ethyl acetate 60:1 to afford **6i** as colorless oil (59.7 mg, 93% yield), TLC:  $R_f = 0.17$  (Petroleum ether : Ethyl acetate = 60:1) [UV].  $^1\text{H}$  NMR (400 MHz,  $\text{CDCl}_3$ )  $\delta$  5.84 – 5.69 (m, 1H), 5.10 – 4.93 (m, 2H), 3.60 – 3.49 (m, 4H), 3.19 (q,  $J = 7.2$  Hz, 2H), 1.24 (t,  $J = 7.2$  Hz, 3H), 1.10 (t,  $J = 7.2$  Hz, 3H).  $^{13}\text{C}$  NMR (100 MHz,  $\text{CDCl}_3$ )  $\delta$  158.5, 147.1 (dm,  $J = 246.0$  Hz), 142.3 (dm,  $J = 249.0$  Hz), 132.7, 118.9, 116.9 (t,  $J = 22.0$  Hz), 114.7 (t,  $J = 20.5$  Hz), 43.3, 39.9, 37.5, 14.1, 12.8.  $^{19}\text{F}$  NMR (376 MHz,  $\text{CDCl}_3$ )  $\delta$  -131.63 – -131.95 (m, 2F), -141.76 – -142.08 (m, 2F). HRMS (ESI-TOF) ( $m/z$ ): Calcd for  $\text{C}_{14}\text{H}_{16}\text{F}_4\text{NOS}$  ( $[\text{M}+\text{H}]^+$ ), 322.0883, found, 322.0886.

#### 4-((2-Chloroethyl)thio)-*N,N*-diethyl-2,3,5,6-tetrafluorobenzamide (6j)

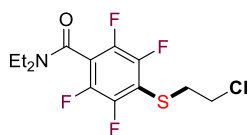

The crude was purified by flash chromatography using Petroleum ether/Ethyl acetate 60:1 to afford **6j** as colorless oil (42.5 mg, 62% yield), TLC:  $R_f = 0.19$  (Petroleum ether : Ethyl acetate = 60:1) [UV].  $^1\text{H}$  NMR (400 MHz, Chloroform- $d$ )  $\delta$  3.68 – 3.55 (m, 4H), 3.30 – 3.18 (m, 4H), 1.27 (t,  $J = 7.2$  Hz, 3H), 1.15 (t,  $J = 7.2$  Hz, 3H).  $^{13}\text{C}$  NMR (100 MHz,  $\text{CDCl}_3$ )  $\delta$  158.3, 147.1 (dm,  $J = 257.5$  Hz), 142.4 (dm,  $J = 252.7$  Hz), 117.6 (t,  $J = 27.5$  Hz), 114.2 (t,  $J = 21.2$  Hz), 43.4, 42.7, 39.9, 36.5, 14.2, 12.9.  $^{19}\text{F}$  NMR (376 MHz,  $\text{CDCl}_3$ )  $\delta$  -131.51 – -131.61 (m, 2F), -140.87 – -140.97 (m, 2F). HRMS (ESI-TOF) ( $m/z$ ): Calcd for  $\text{C}_{13}\text{H}_{15}\text{ClF}_4\text{NOS}$  ( $[\text{M}+\text{H}]^+$ ), 344.0494, found, 344.0485.

#### 4-(Cycloheptylthio)-*N,N*-diethyl-2,3,5,6-tetrafluorobenzamide (6k)

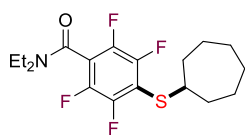

The crude was purified by flash chromatography using Petroleum ether/ Ethyl acetate 60:1 to afford **6j** as colorless oil (63.3 mg, 84% yield),

TLC:  $R_f$  = 0.18 (Petroleum ether : Ethyl acetate = 60:1) [UV].  **$^1\text{H}$  NMR**

(400 MHz,  $\text{CDCl}_3$ )  $\delta$  3.59 (q,  $J$  = 7.2 Hz, 2H), 3.53 – 3.40 (m, 1H), 3.23 (q,  $J$  = 7.2 Hz, 2H), 1.98 – 1.87 (m, 2H), 1.80 – 1.68 (m, 2H), 1.62 – 1.50 (m, 6H), 1.48 – 1.38 (m, 2H), 1.26 (t,  $J$  = 7.0 Hz, 3H), 1.13 (t,  $J$  = 7.2 Hz, 3H).  **$^{13}\text{C}$  NMR** (100 MHz,  $\text{CDCl}_3$ )  $\delta$  158.7, 147.3 (dm,  $J$  = 245.5 Hz), 142.4 (dm,  $J$  = 266.0 Hz), 116.7 (t,  $J$  = 22.0 Hz), 115.7 (t,  $J$  = 20.5 Hz), 49.0, 43.4, 39.8, 35.1, 28.2, 25.6, 14.1, 12.9.  **$^{19}\text{F}$  NMR** (376 MHz,  $\text{CDCl}_3$ )  $\delta$  -131.45 – -131.88 (m, 2F), -141.58 – -141.94 (m, 2F). **HRMS** (ESI-TOF) ( $m/z$ ): Calcd for  $\text{C}_{18}\text{H}_{24}\text{F}_4\text{NOS}$  ( $[\text{M}+\text{H}]^+$ ), 378.1509, found, 378.1510.

#### *N,N*-diethyl-2,3,5,6-tetrafluoro-4-(phenylthio)benzamide (6l)

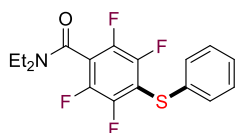

The crude was purified by flash chromatography using Petroleum ether/ Ethyl acetate 30:1 to afford **6l** as colorless oil (51.4 mg, 72% yield), TLC:

$R_f$  = 0.16 (Petroleum ether : Ethyl acetate = 30:1) [UV].  **$^1\text{H}$  NMR** (400

MHz, Chloroform- $d$ )  $\delta$  7.41 – 7.37 (m, 2H), 7.34 – 7.28 (m, 3H), 3.59 (q,  $J$  = 7.2 Hz, 2H), 3.24 (q,  $J$  = 7.2 Hz, 2H), 1.26 (t,  $J$  = 7.2 Hz, 3H), 1.14 (t,  $J$  = 7.2 Hz, 3H).  **$^{13}\text{C}$  NMR** (100 MHz, Chloroform- $d$ )  $\delta$  158.3, 147.0 (dm,  $J$  = 247.0 Hz), 142.4 (dm,  $J$  = 251.0 Hz), 132.4, 131.0, 129.4, 128.1, 117.6 (t,  $J$  = 22.0 Hz), 115.2 (t,  $J$  = 20.0 Hz), 43.3, 39.7, 14.0, 12.7.  **$^{19}\text{F}$  NMR** (376 MHz, Chloroform- $d$ )  $\delta$  -131.05 – -131.21 (m, 2F), -140.91 – -141.15 (m, 2F). **HRMS** (ESI-TOF) ( $m/z$ ): Calcd for  $\text{C}_{17}\text{H}_{16}\text{F}_4\text{NOS}$  ( $[\text{M} + \text{H}]^+$ ), 358.0883, found, 358.0880.

#### 4-((3,4-Dibromophenyl)thio)-*N,N*-diethyl-2,3,5,6-tetrafluorobenzamide (6m)

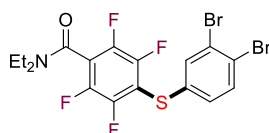

The crude was purified by flash chromatography using Petroleum ether/ Ethyl acetate 15:1 to afford **6m** as colorless oil (44.0 mg, 43% yield), TLC:  $R_f$  = 0.19 (Petroleum ether : Ethyl acetate = 15:1) [UV].

**$^1\text{H}$  NMR** (400 MHz, Chloroform- $d$ )  $\delta$  7.57 (d,  $J$  = 8.8 Hz, 1H), 7.28 (d,  $J$  = 2.8 Hz, 1H), 6.83 (dd,  $J$  = 8.8, 3.2 Hz, 1H), 3.61 (q,  $J$  = 7.2 Hz, 2H), 3.27 (q,  $J$  = 7.2 Hz, 2H), 1.28 (t,  $J$  = 7.2 Hz, 3H), 1.17 (t,  $J$  = 7.2 Hz, 3H).  **$^{13}\text{C}$  NMR** (100 MHz, Chloroform- $d$ )  $\delta$  158.1, 156.2, 143.1 (dm,  $J$  = 253.6 Hz), 141.5 (dm,  $J$  = 253.3 Hz), 134.4, 125.7, 121.2, 119.6, 116.3, 43.5, 40.0, 14.2, 12.9.  **$^{19}\text{F}$  NMR** (376 MHz, Chloroform- $d$ )  $\delta$  -141.03 – -141.13 (m, 2F), -152.00 – -152.09 (m, 2F). **HRMS** (ESI-TOF) ( $m/z$ ): Calcd for  $\text{C}_{17}\text{H}_{14}\text{Br}_2\text{F}_4\text{NOS}$  ( $[\text{M} + \text{H}]^+$ ), 513.9093, found, 513.9088.

#### 4,4'-Sulfinylbis(*N,N*-diethyl-2,3,5,6-tetrafluorobenzamide) (7)

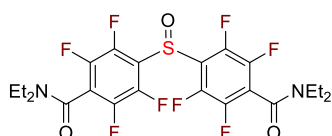

The crude was purified by flash chromatography using Petroleum ether/ Ethyl acetate 10:1 to afford **7** as colorless oil (94.6 mg, 87% yield), TLC:  $R_f$  = 0.11 (Petroleum ether : Ethyl

acetate = 10:1) [UV].  **$^1\text{H}$  NMR** (400 MHz,  $\text{CDCl}_3$ )  $\delta$  3.59 (q,  $J$  = 7.2 Hz, 4H), 3.24 (q,  $J$  = 7.0 Hz,

4H), 1.27 (t,  $J = 7.0$  Hz, 6H), 1.17 (t,  $J = 7.2$  Hz, 6H).  $^{13}\text{C}$  NMR (100 MHz,  $\text{CDCl}_3$ )  $\delta$  157.4, 144.2 (dm,  $J = 262.0$  Hz), 142.5 (dm,  $J = 253.0$  Hz), 121.4 (t,  $J = 22.0$  Hz), 112.5 (t,  $J = 26.0$  Hz), 43.5, 40.0, 14.2, 12.8.  $^{19}\text{F}$  NMR (376 MHz,  $\text{CDCl}_3$ )  $\delta$  -137.77 – -137.98 (m, 2F), -138.00 – -138.15 (m, 2F), -138.25 (dd,  $J = 22.9, 12.0$  Hz, 2F), -138.62 (dd,  $J = 22.6, 11.3$  Hz, 2F). HRMS (ESI-TOF) ( $m/z$ ): Calcd for  $\text{C}_{22}\text{H}_{20}\text{F}_8\text{N}_2\text{O}_3\text{S}$  ( $[\text{M} + \text{H}]^+$ ), 544.1067, found, 544.1060.

**4,4'-Sulfonylbis(*N,N*-diethyl-2,3,5,6-tetrafluorobenzamide) (8)**

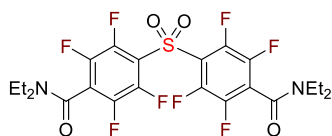

The crude was purified by flash chromatography using Petroleum ether/ Ethyl acetate 10:1 to afford **8** as colorless oil (72.8 mg, 65% yield), TLC:  $R_f = 0.12$  (Petroleum ether : Ethyl acetate = 10:1) [UV].  $^1\text{H}$  NMR (400 MHz,  $\text{CDCl}_3$ )  $\delta$  3.59 (q,  $J = 7.2$  Hz, 4H), 3.23 (q,  $J = 7.2$  Hz, 4H), 1.26 (t,  $J = 7.2$  Hz, 6H), 1.16 (t,  $J = 7.2$  Hz, 6H).  $^{13}\text{C}$  NMR (100 MHz,  $\text{CDCl}_3$ )  $\delta$  156.8, 144.5 (dm,  $J = 266.5$  Hz), 142.6 (dm,  $J = 254.5$  Hz), 123.6 (t,  $J = 22.5$  Hz), 120.6 (t,  $J = 22.0$  Hz), 43.4, 40.0, 14.2, 12.8.  $^{19}\text{F}$  NMR (376 MHz,  $\text{CDCl}_3$ )  $\delta$  -133.95 – -134.27 (m, 4F), -137.51 – -137.79 (m, 4F). HRMS (ESI-TOF) ( $m/z$ ): Calcd for  $\text{C}_{22}\text{H}_{20}\text{F}_8\text{N}_2\text{O}_4\text{S}$  ( $[\text{M} + \text{H}]^+$ ), 560.1016, found, 560.1011.

**Bis((1*R*,2*S*,5*R*)-2-isopropyl-5-methylcyclohexyl) 4,4'-thiobis(2,3,5,6-tetrafluorobenzoate) (9)**

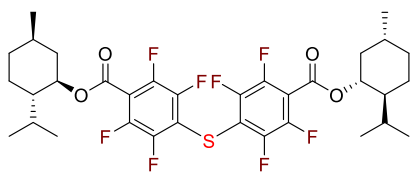

The crude was purified by flash chromatography using Petroleum ether/ Ethyl acetate 50:1 to afford **9** as colorless oil (95.8 mg, 69% yield), TLC:  $R_f = 0.15$  (Petroleum ether : Ethyl acetate = 50:1) [UV].  $^1\text{H}$  NMR (400 MHz,  $\text{CDCl}_3$ )  $\delta$  5.05 – 4.94 (m, 2H), 2.19 – 2.13 (m, 2H), 2.03 – 1.94 (m, 2H), 1.78 – 1.70 (m, 4H), 1.59 – 1.45 (m, 4H), 1.19 – 1.07 (m, 4H), 0.93 (m, 14H), 0.81 (d,  $J = 7.2$  Hz, 6H).  $^{13}\text{C}$  NMR (100 MHz,  $\text{CDCl}_3$ )  $\delta$  158.8, 146.6 (dm,  $J = 249.0$  Hz), 144.3 (dm,  $J = 254.5$  Hz), 115.3 (t,  $J = 17.5$  Hz), 113.6 (t,  $J = 20.0$  Hz), 78.1, 47.0, 40.7, 34.2, 31.7, 26.1, 23.2, 22.1, 20.9, 16.0.  $^{19}\text{F}$  NMR (376 MHz,  $\text{CDCl}_3$ )  $\delta$  -131.85 – -132.05 (m, 4F), -138.25 – -138.51 (m, 4F). HRMS (ESI-TOF) ( $m/z$ ): Calcd for  $\text{C}_{34}\text{H}_{38}\text{F}_8\text{O}_4\text{S}$  ( $[\text{M}]^+$ ), 694.2363, found, 694.2366.

**Bis((1*R*,2*S*,4*R*)-1,7,7-trimethylbicyclo[2.2.1]heptan-2-yl) 4,4'-thiobis(2,3,5,6-tetrafluorobenzoate) (10)**

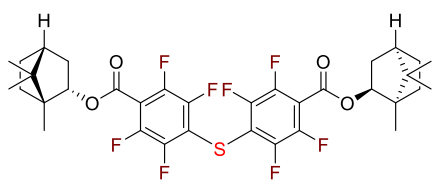

The crude was purified by flash chromatography using Petroleum ether/ Ethyl acetate 50:1 to afford **10** as colorless oil (85.6 mg, 62% yield), TLC:  $R_f = 0.17$  (Petroleum ether : Ethyl acetate = 50:1) [UV].  $^1\text{H}$  NMR (400 MHz,  $\text{CDCl}_3$ )  $\delta$  5.22 – 5.15 (m, 2H), 2.55 – 2.43 (m, 2H), 2.00 – 1.92 (m, 2H), 1.80 – 1.72 (m, 4H), 1.40 – 1.23 (m, 6H), 1.16 (d,  $J = 3.6$  Hz, 1H), 1.13 (d,  $J = 3.6$  Hz, 1H), 0.95 (s, 6H), 0.91 (s, 10H).  $^{13}\text{C}$  NMR (100 MHz,  $\text{CDCl}_3$ )  $\delta$  159.5, 146.7 (dm,  $J = 251.0$  Hz), 144.6 (dm,  $J = 258.0$  Hz), 131.0, 129.0, 114.9 (t,  $J = 16.0$  Hz), 113.9 (t,  $J = 20.0$  Hz), 83.8, 49.2, 48.1, 45.0, 36.8, 28.1, 27.2, 19.8, 19.0, 13.5.  $^{19}\text{F}$  NMR (376 MHz,  $\text{CDCl}_3$ )  $\delta$  -131.85 – -132.16 (m, 4F), -137.79 – -138.08 (m, 4F). HRMS (ESI-TOF) ( $m/z$ ): Calcd for  $\text{C}_{34}\text{H}_{34}\text{F}_8\text{O}_4\text{S}$  ( $[\text{M}]^+$ ), 690.2050, found,

690.2052.

**Bis((3S,8S,9S,10R,13R,14S,17R)-10,13-dimethyl-17-((R)-6-methylheptan-2-yl)-2,3,4,7,8,9,10,11,12,13,14,15,16,17-tetradecahydro-1H-cyclopenta[a]phenanthren-3-yl) 4,4'-thiobis(2,3,5,6-tetrafluorobenzoate) (11)**

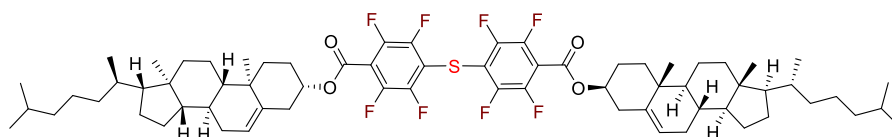

The crude was purified by flash chromatography

by using Petroleum ether/ Ethyl acetate 50:1 to afford **11** as colorless oil (131.6 mg, 57% yield), TLC:  $R_f$  = 0.17 (Petroleum ether : Ethyl acetate = 50:1) [UV].  $^1\text{H NMR}$  (400 MHz,  $\text{CDCl}_3$ )  $\delta$  5.45 – 5.42 (m, 2H), 4.97 – 4.87 (m, 2H), 2.50 – 2.43 (m, 4H), 2.02 – 1.04 (m, 58H), 0.92 (d,  $J$  = 6.8 Hz, 6H), 0.87 (dd,  $J$  = 6.4, 2.0 Hz, 12H), 0.68 (s, 6H).  $^{13}\text{C NMR}$  (100 MHz,  $\text{CDCl}_3$ )  $\delta$  158.5, 146.6 (dm,  $J$  = 250.0 Hz), 144.4 (dm,  $J$  = 257.5 Hz), 139.1, 123.5, 115.0 (t,  $J$  = 16.5 Hz), 113.8 (t,  $J$  = 20.0 Hz), 56.8, 56.1, 50.1, 42.5, 39.9, 39.7, 38.0, 37.0, 36.7, 36.3, 35.9, 32.1, 32.0, 28.4, 28.2, 27.8, 24.4, 24.0, 23.0, 22.7, 21.2, 19.4, 18.9, 12.0.  $^{19}\text{F NMR}$  (376 MHz,  $\text{CDCl}_3$ )  $\delta$  -131.86 – -132.13 (m, 4F), -138.08 – -138.30 (m, 4F). **HRMS** (ESI-TOF) ( $m/z$ ): Calcd for  $\text{C}_{68}\text{H}_{90}\text{F}_8\text{O}_4\text{S}$  ( $[\text{M}]^+$ ), 1154.6432, found, 1154.6449.

**Methyl 2,3,5,6-tetrafluoro-4-((2,3,5,6-tetrafluoro-4-(morpholine-4-carbonyl)phenyl)thio)benzoate (12)**

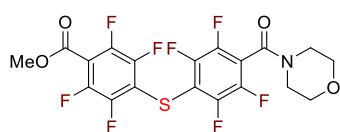

The crude was purified by flash chromatography using Petroleum ether/ Ethyl acetate 20:1 to afford **12** as colorless oil (18.0 mg, 18% yield), TLC:  $R_f$  = 0.16 (Petroleum ether : Ethyl

acetate = 20:1) [UV].  $^1\text{H NMR}$  (400 MHz,  $\text{CDCl}_3$ )  $\delta$  3.99 (s, 3H), 3.84 – 3.78 (m, 4H), 3.70 – 3.67 (m, 2H), 3.35 – 3.32 (m, 2H).  $^{13}\text{C NMR}$  (100 MHz,  $\text{CDCl}_3$ )  $\delta$  157.2, 146.7 (dm,  $J$  = 252.0 Hz), 144.6 (dm,  $J$  = 258.0 Hz), 117.2 (t,  $J$  = 21.0 Hz), 114.1 (t,  $J$  = 17.0 Hz), 66.9, 66.7, 53.7, 47.4, 42.8.  $^{19}\text{F NMR}$  (376 MHz,  $\text{CDCl}_3$ )  $\delta$  -130.59 – -130.76 (m, 2F), -131.66 – -131.85 (m, 4F), -137.47 – -137.65 (m, 2F), -139.22 – -139.43 (m, 2F). **HRMS** (ESI-TOF) ( $m/z$ ): Calcd for  $\text{C}_{19}\text{H}_{11}\text{F}_8\text{NO}_4\text{S}$  ( $[\text{M} + \text{H}]^+$ ), 502.0354, found, 502.0353.

## 4. Mechanistic investigation

### 4.1 Cross-over experiment

To gain deeper insights into the aforementioned transformation, a cross-over experiment was performed, where **1d** (28.1 mg, 0.1 mmol, 1.0 equiv) and **1f** (22.6 mg, 0.1 mmol, 1.0 equiv) were subjected to the same reaction conditions in one pot manner in the presence of potassium thioacetate **2c** (17.1 mg, 0.15 mmol, 0.75 equiv). The cross-over product **12** was detected in 18% yield, most of the symmetric sulfide **4d** and **4f** were generated, and the yields were 26% and 32%, respectively.

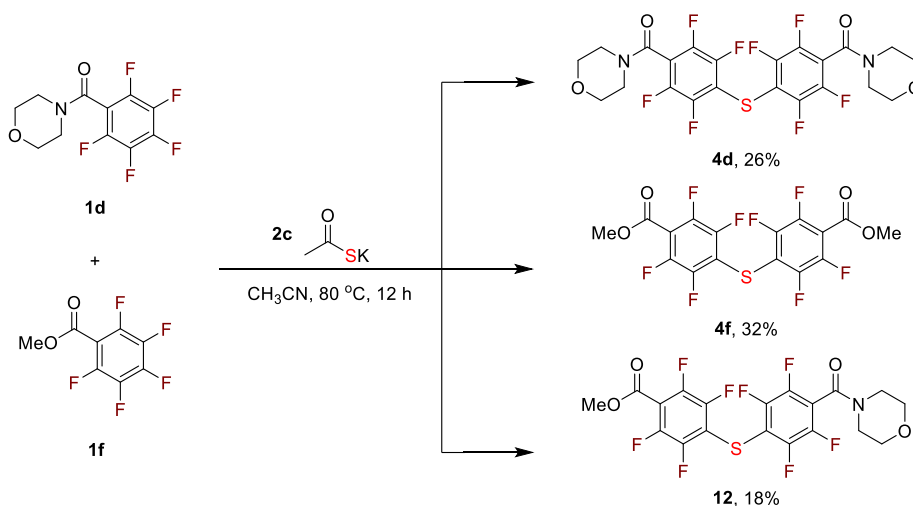

### 4.2 Intermediate capture experiment

To confirm the formation of thiolate intermediate during the reaction, an intermediate capture experiment was performed, where **1a** (53.4 mg, 0.2 mmol, 1.0 equiv.) and  $\text{H}_2\text{O}$  (36.0 mg, 4.0 mmol, 20 equiv.) were subjected to the same reaction conditions in one pot manner in the presence of potassium thioacetate **2c** (25.1 mg, 0.22 mmol, 1.1 equiv.). The arylthiophenol **13** was detected in 21% yield, indicating that a polyfluoroarene-substituted sulfur anion may serve as a key intermediate in this reaction.

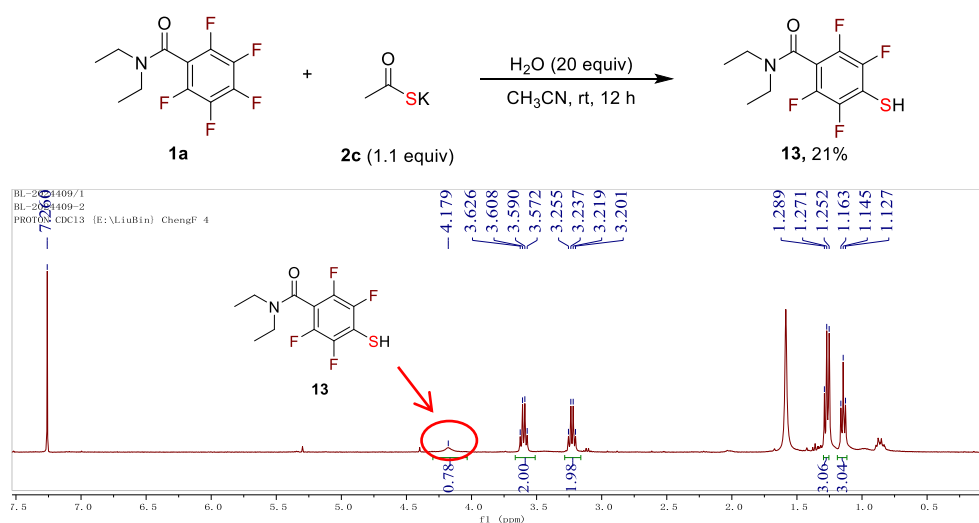

$^1\text{H}$  NMR of **13**

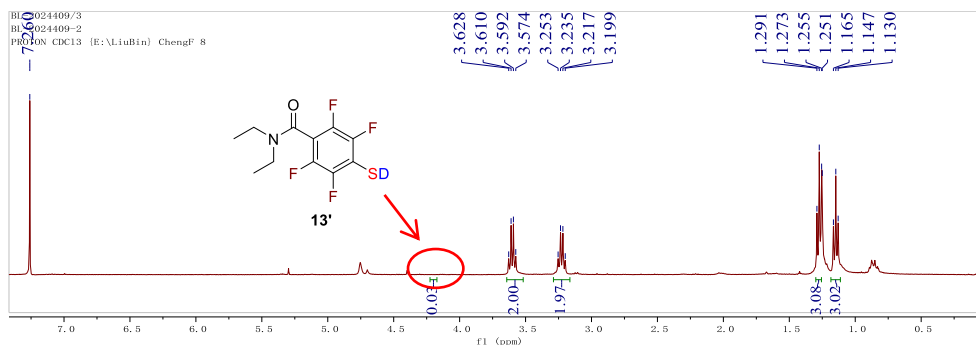

### <sup>1</sup>H NMR of **13** (Deuterium exchange experiment)

#### 4.3 Controlled experiment

To confirm the special use of fluorine atom in the reaction, a controlled experiment was performed, where brominated polyfluoroarenes **1t** (59.2 mg, 0.2 mmol, 1.0 equiv) was subjected to the same reaction conditions. The product **4k** was detected in 23% yield. Compared with the use of polyfluoroarene **1k**, the yield of product **4k** was significantly reduced. This indicates that compared with fluorine ion, bromine ion has poor leaving ability or nucleophilic property in the reaction process.

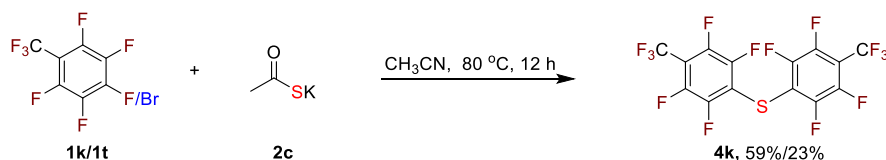

#### 4.4 Radical inhibition experiments

To investigate if the sulfane formation proceeds through the radical pathway, we conducted a couple of reactions in the presence of trapping reagent TEMPO and BHT. Under the standard conditions, two equivalent of radical scavengers (TEMPO, BHT) were added to the reaction. To our delight, standard product **4a** was afforded in 89% and 90% yield. No significant decrease of yield was observed. Hence, it can be concluded that the reaction is not passing through radical pathway.

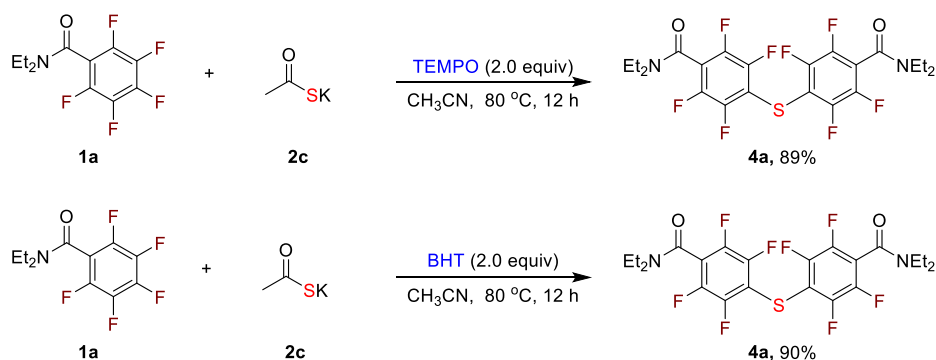

## 5. References

- [1] Zhao, Y.; Fu, B.; Wang, S.; Li, Y.; Yuan, X.; Yin, J.; Xiong, T.; Zhang, Q. *Org. Lett.* **2023**, *25*, 2492.

## 6. $^1\text{H}$ , $^{13}\text{C}$ , $^{19}\text{F}$ Spectra of New Compounds

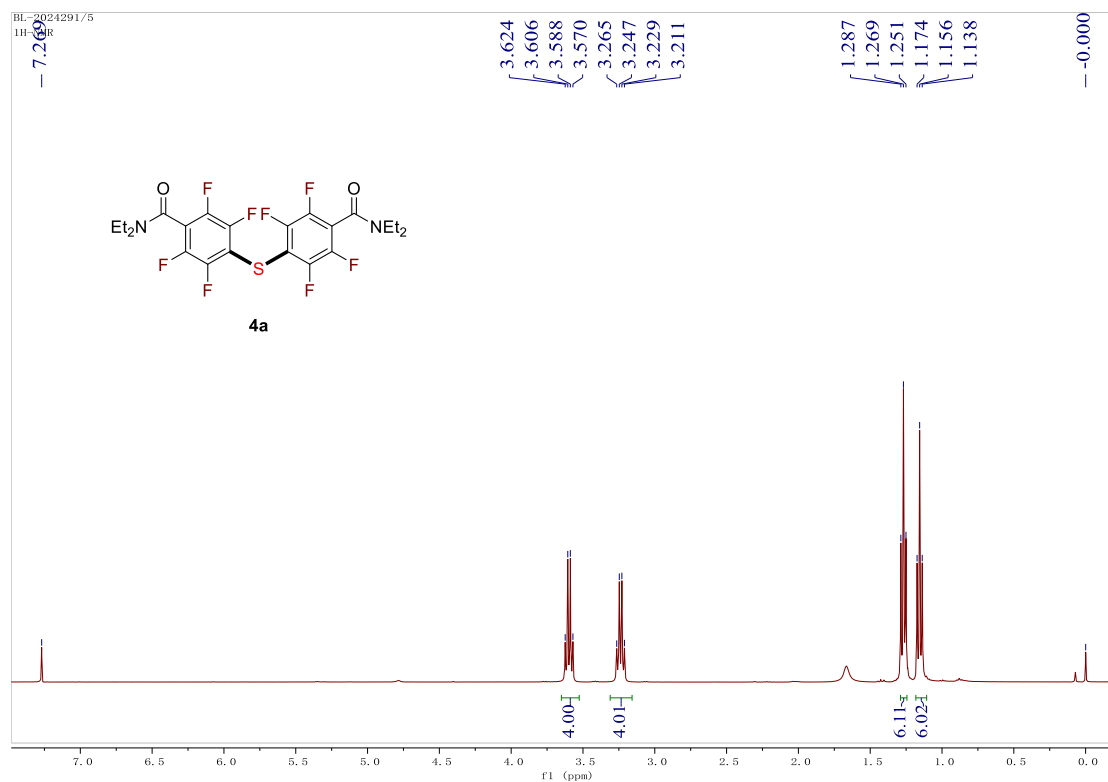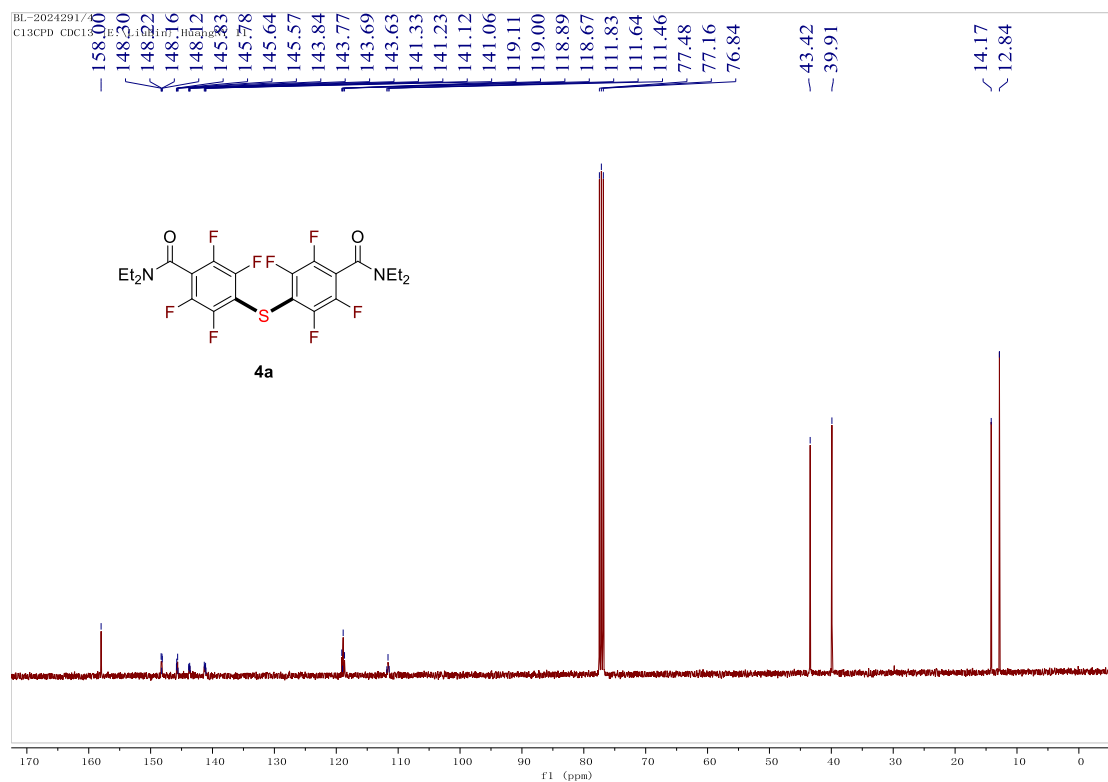

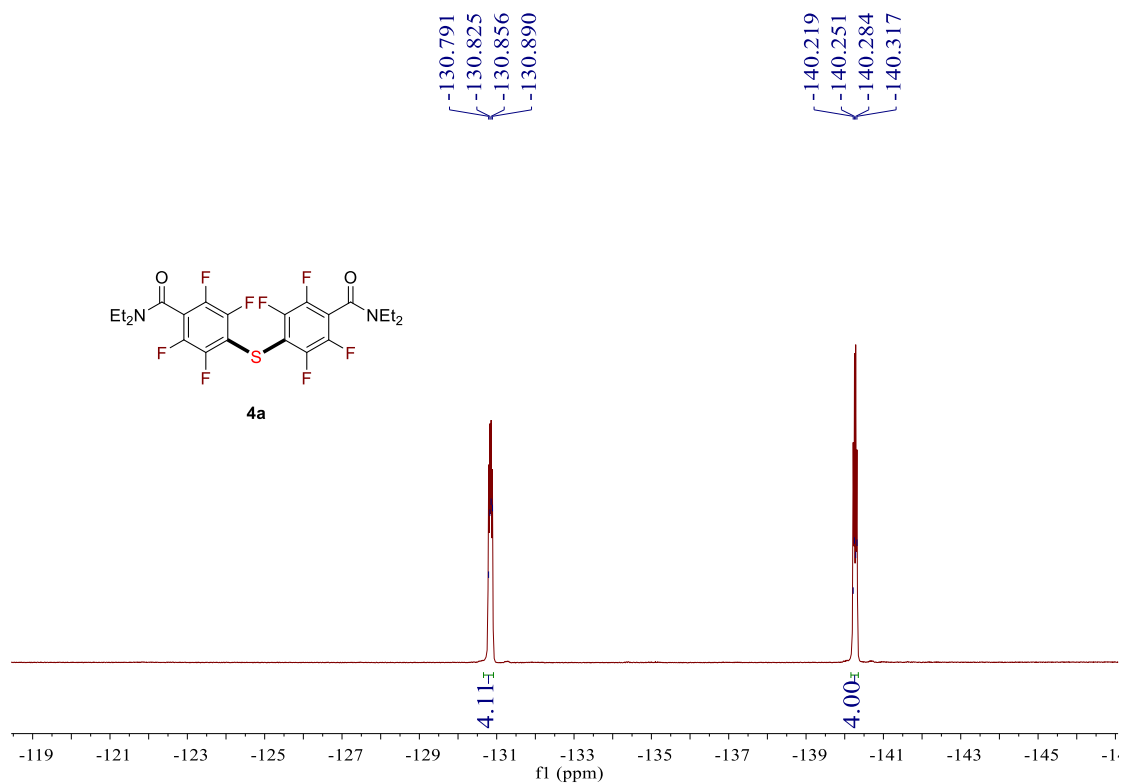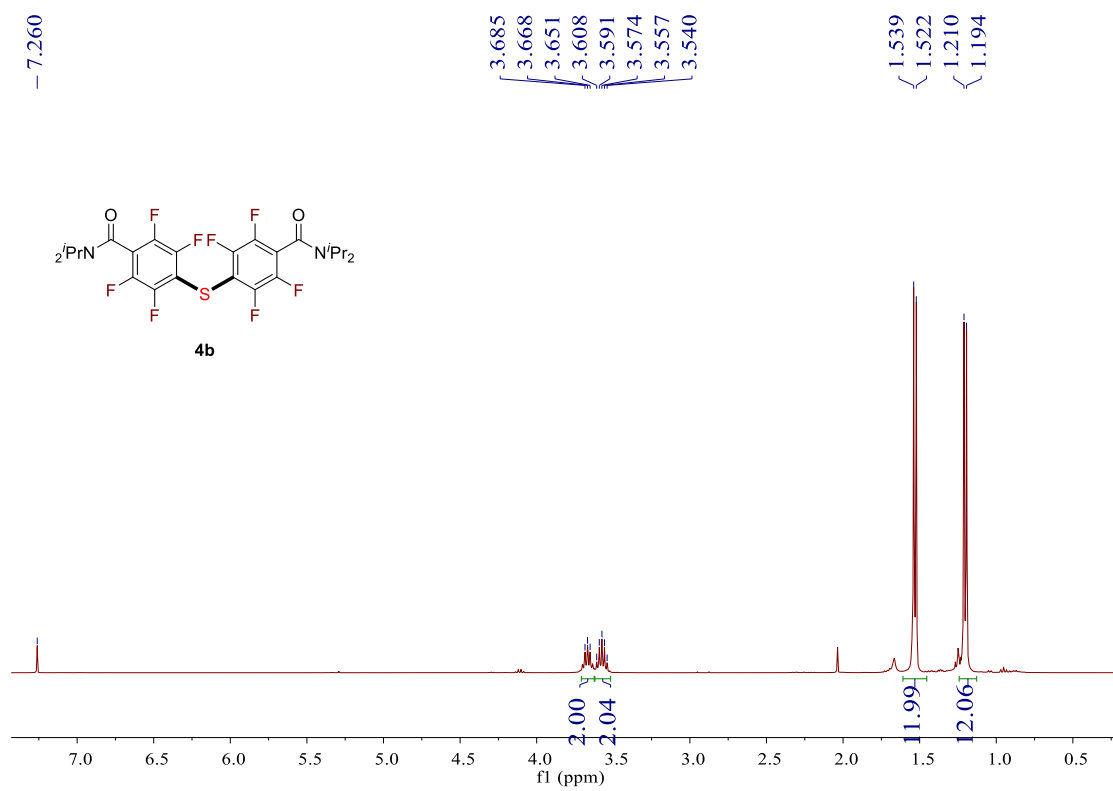

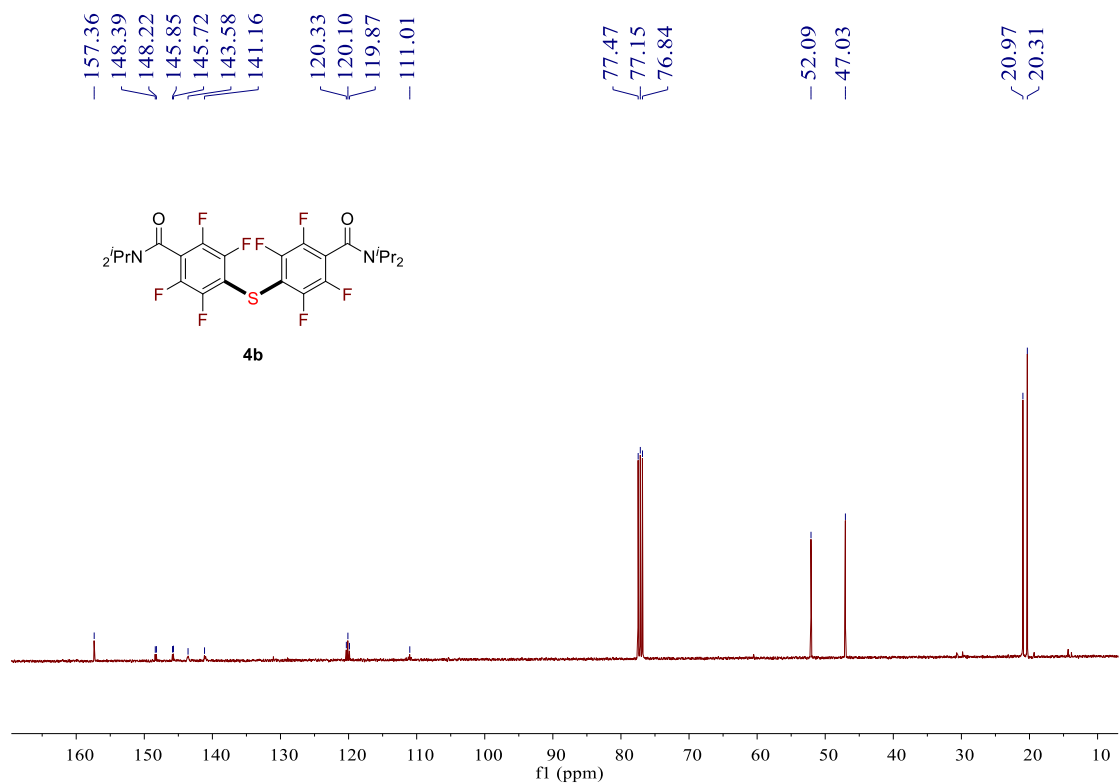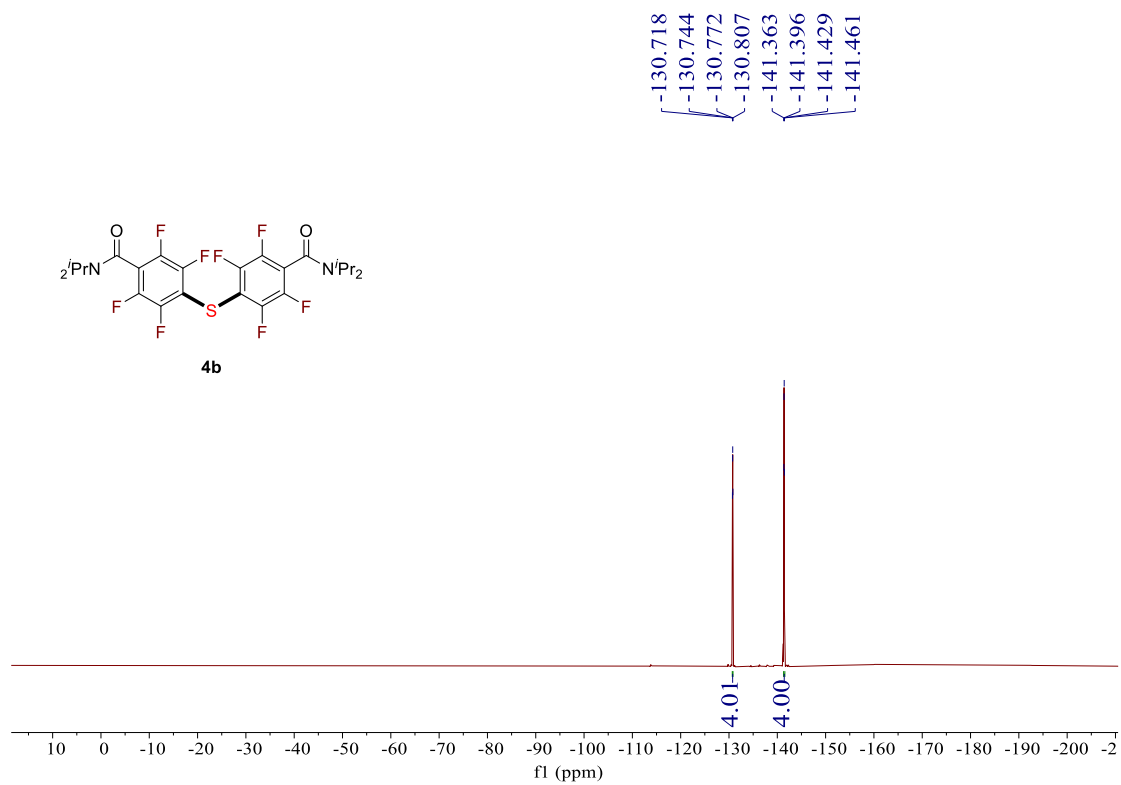

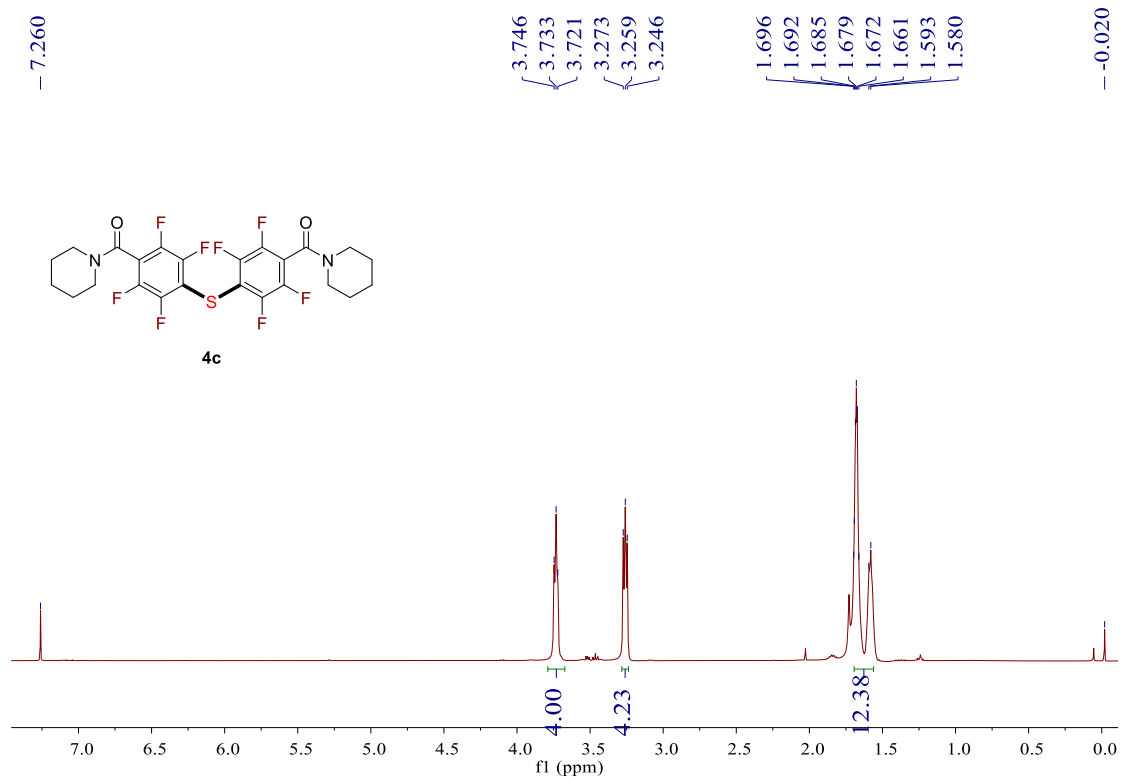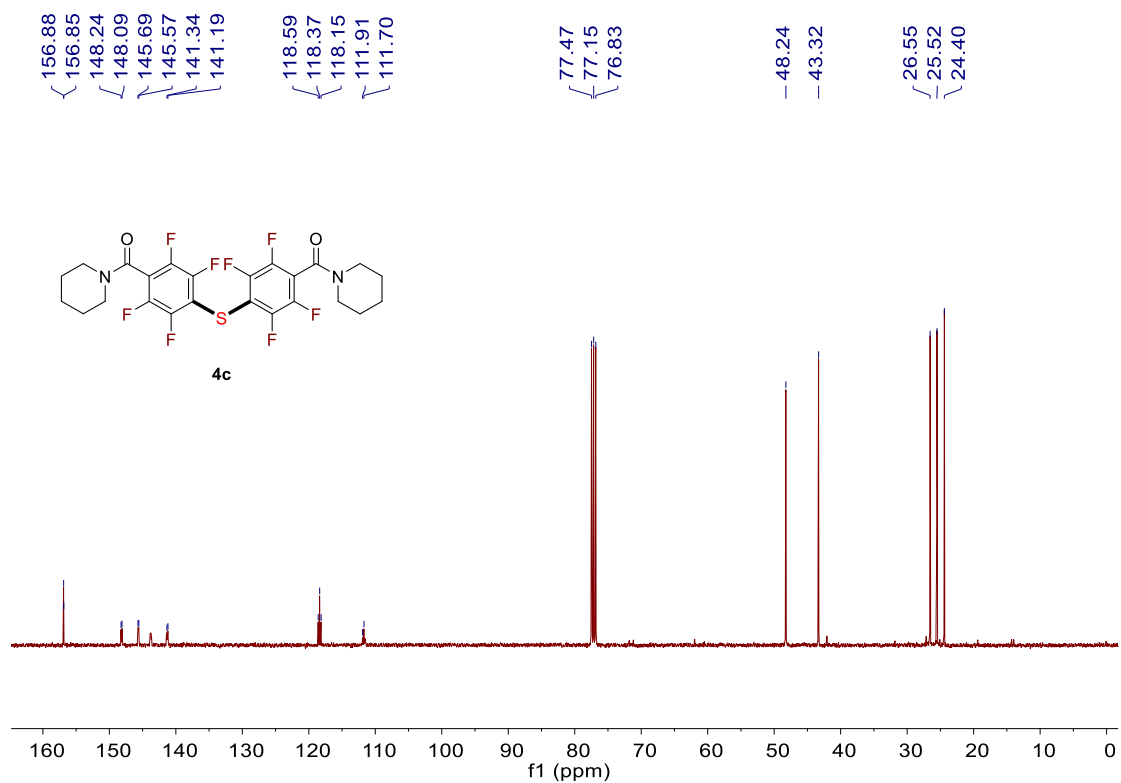

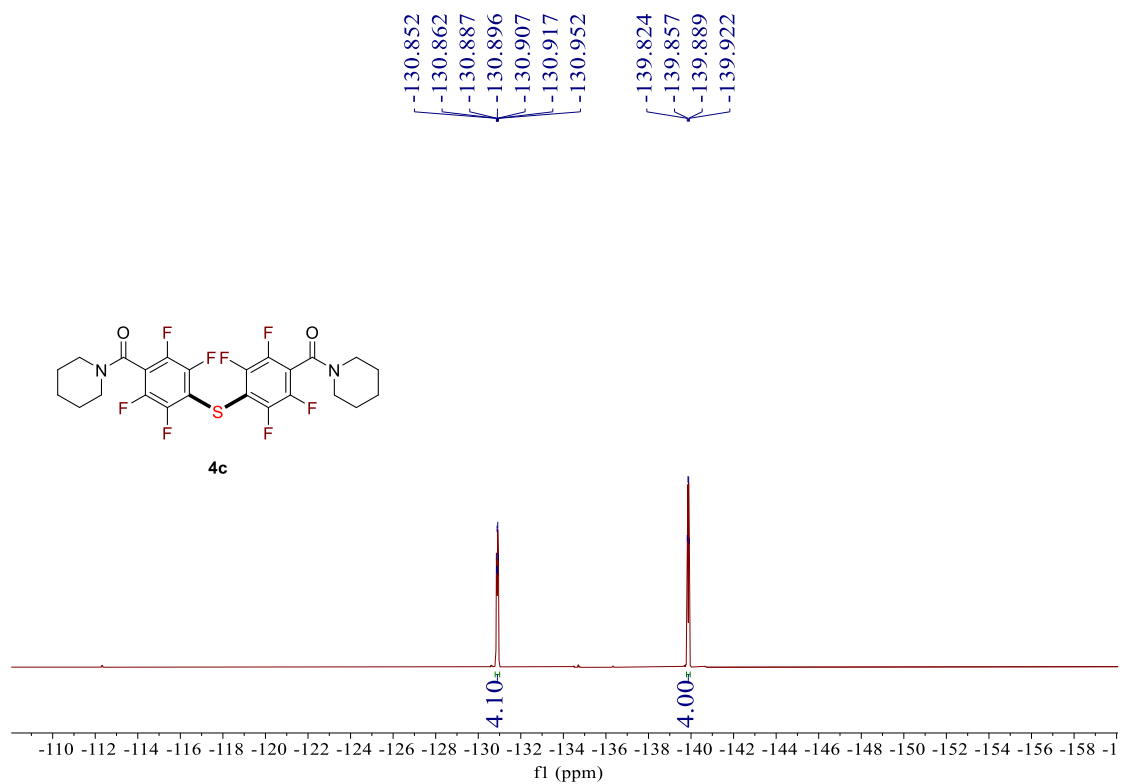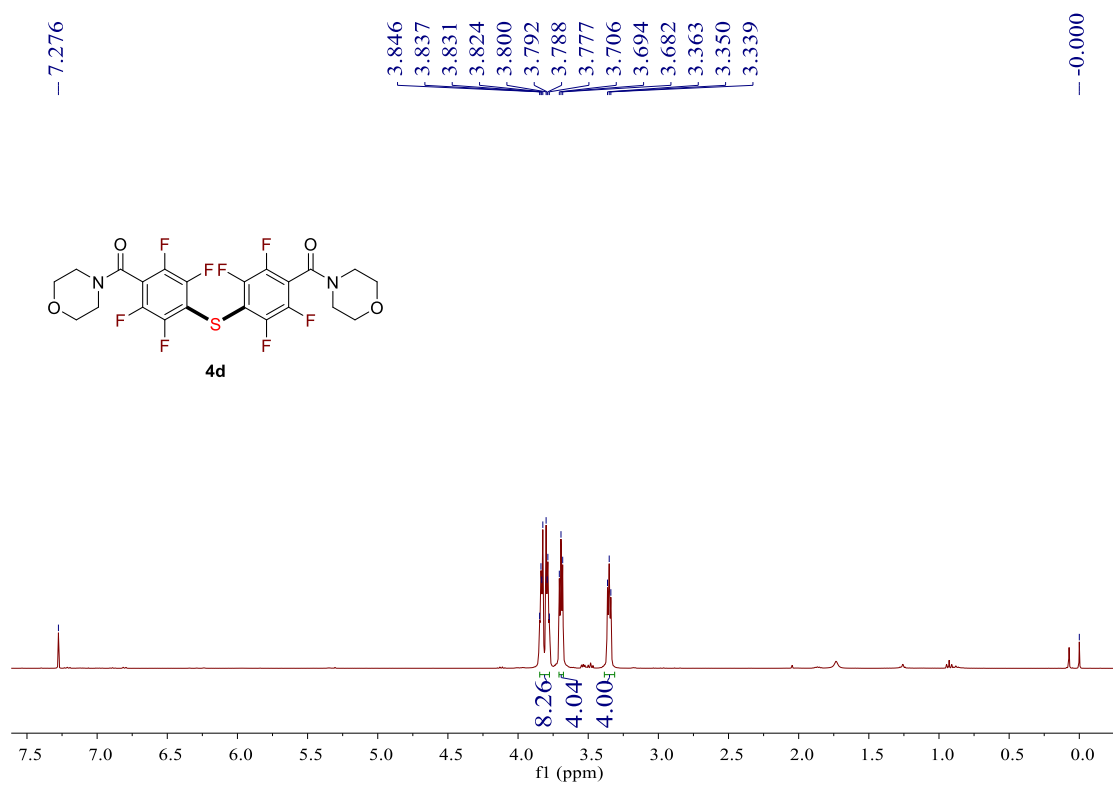

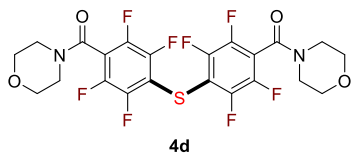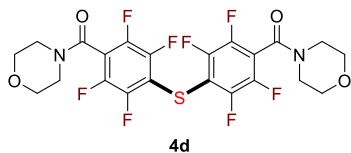

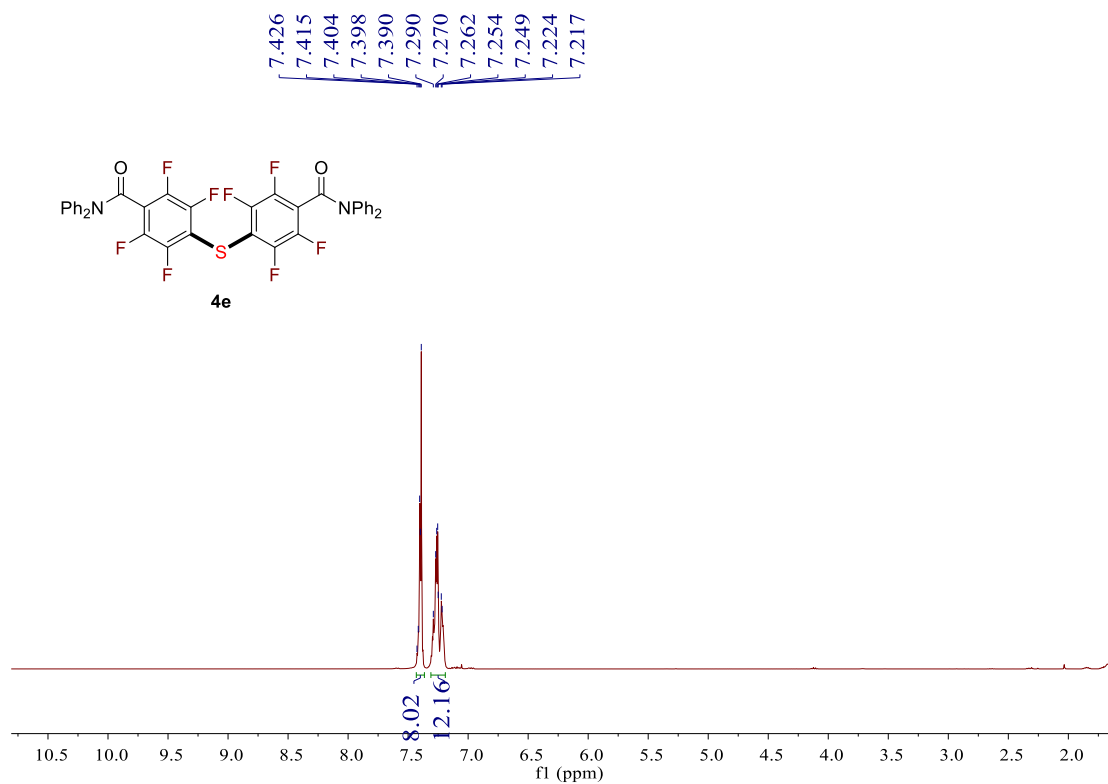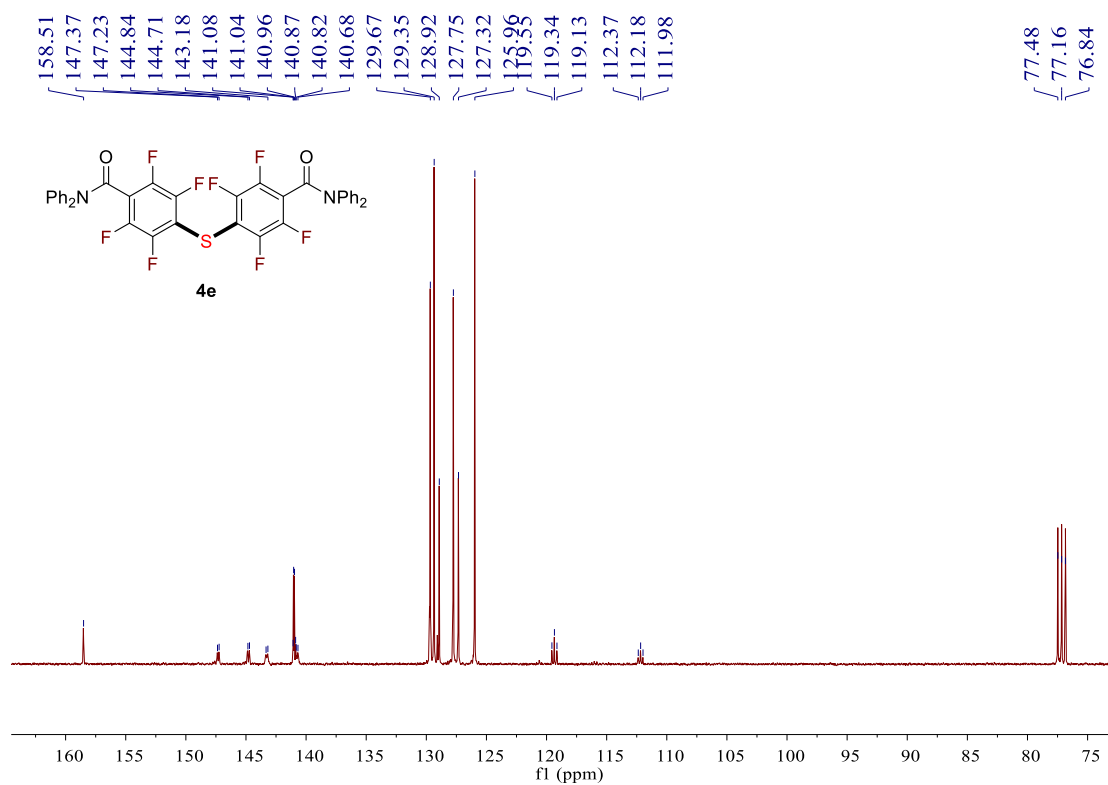

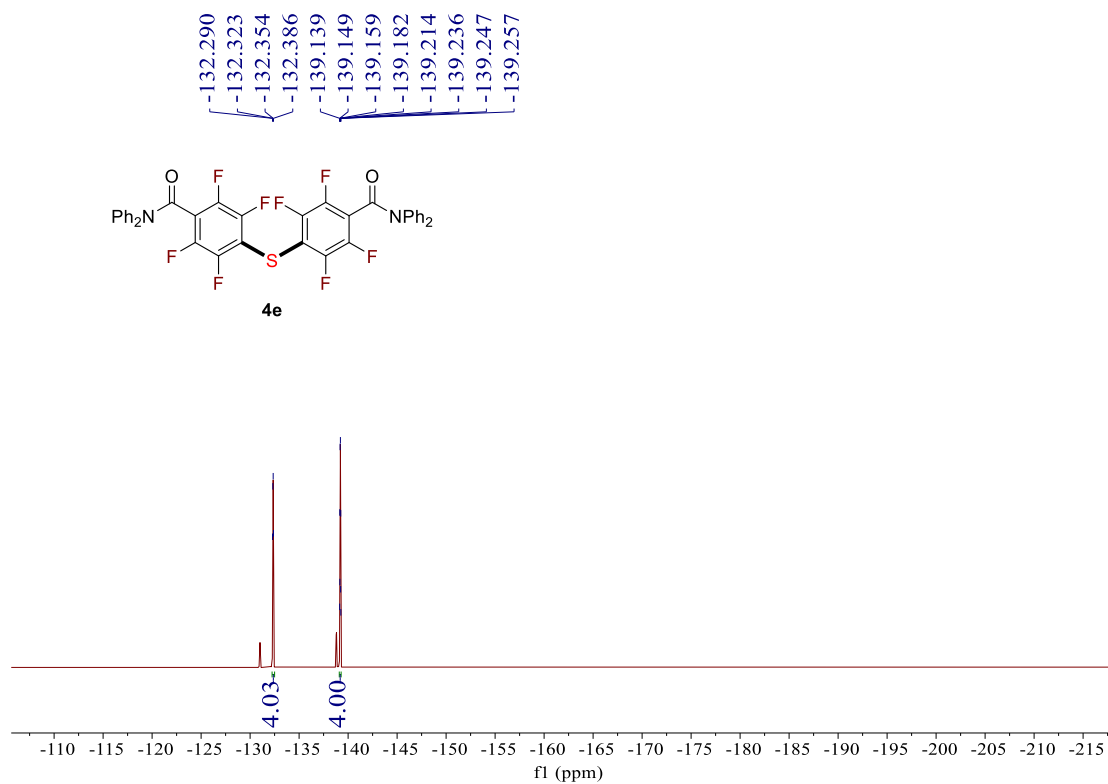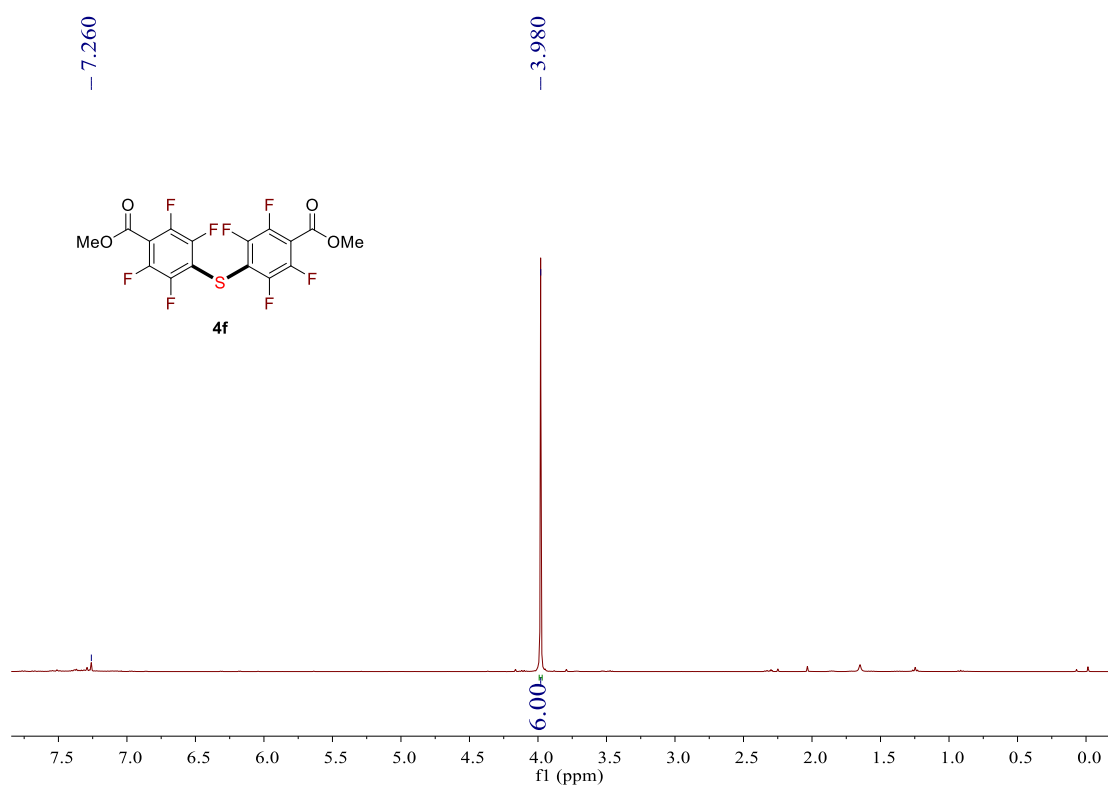

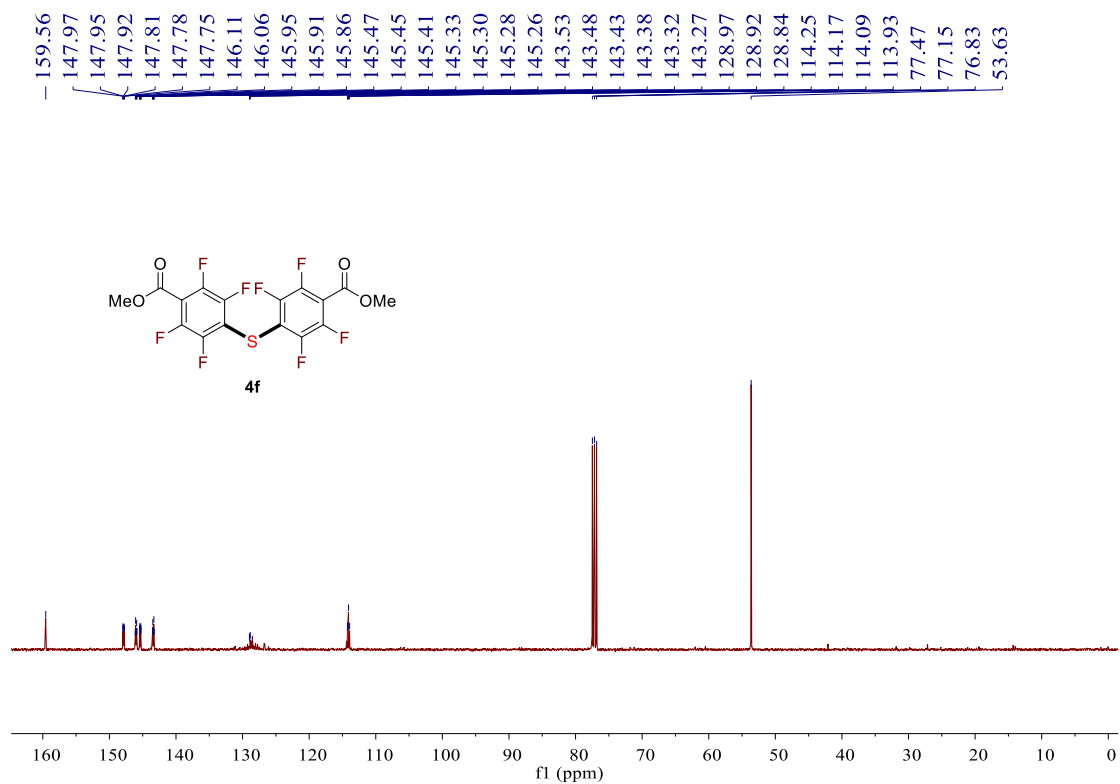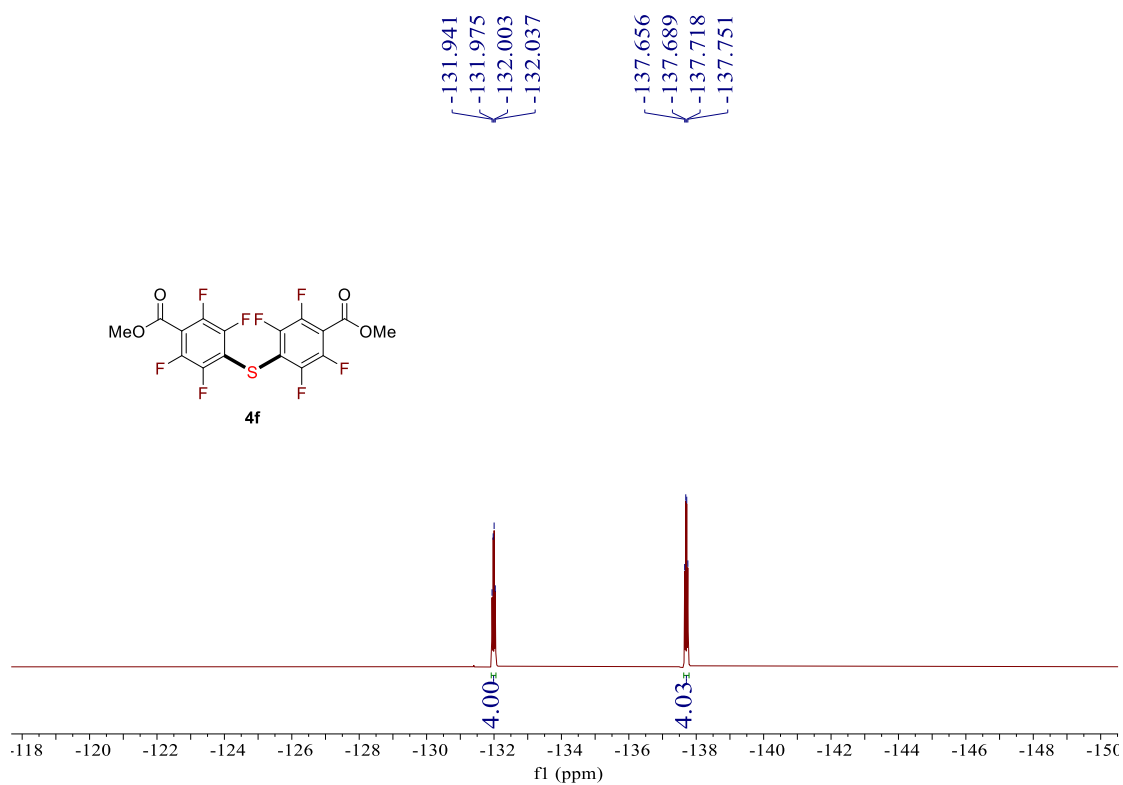

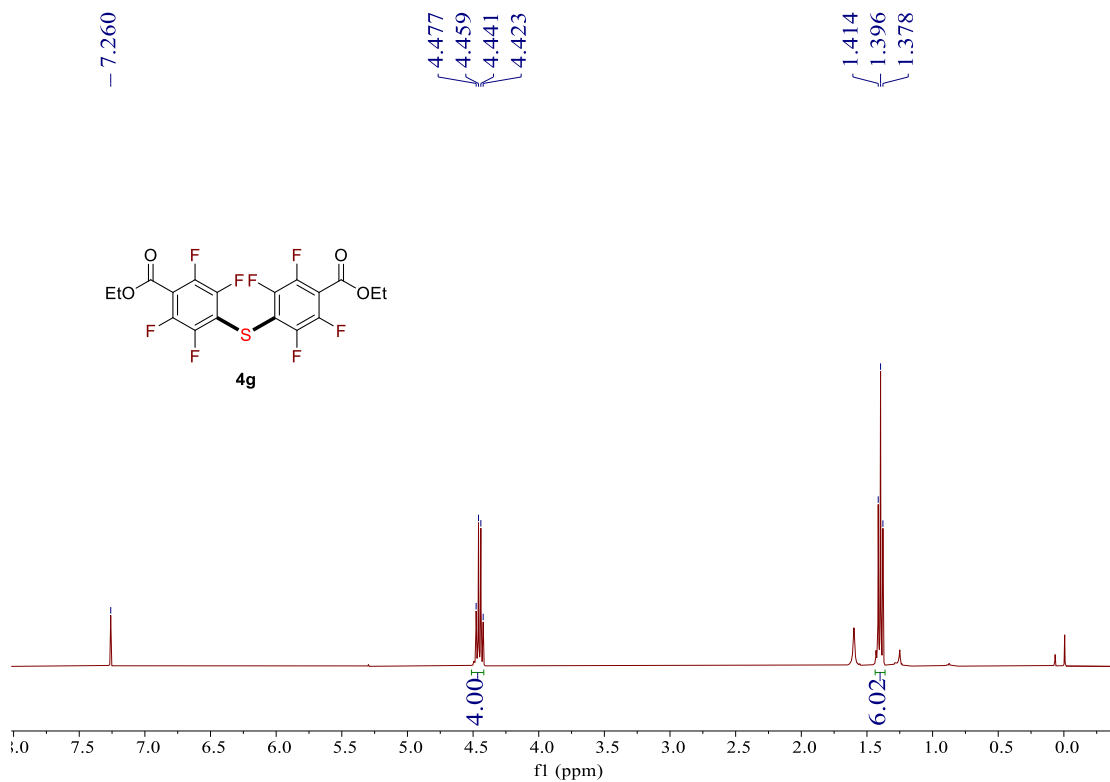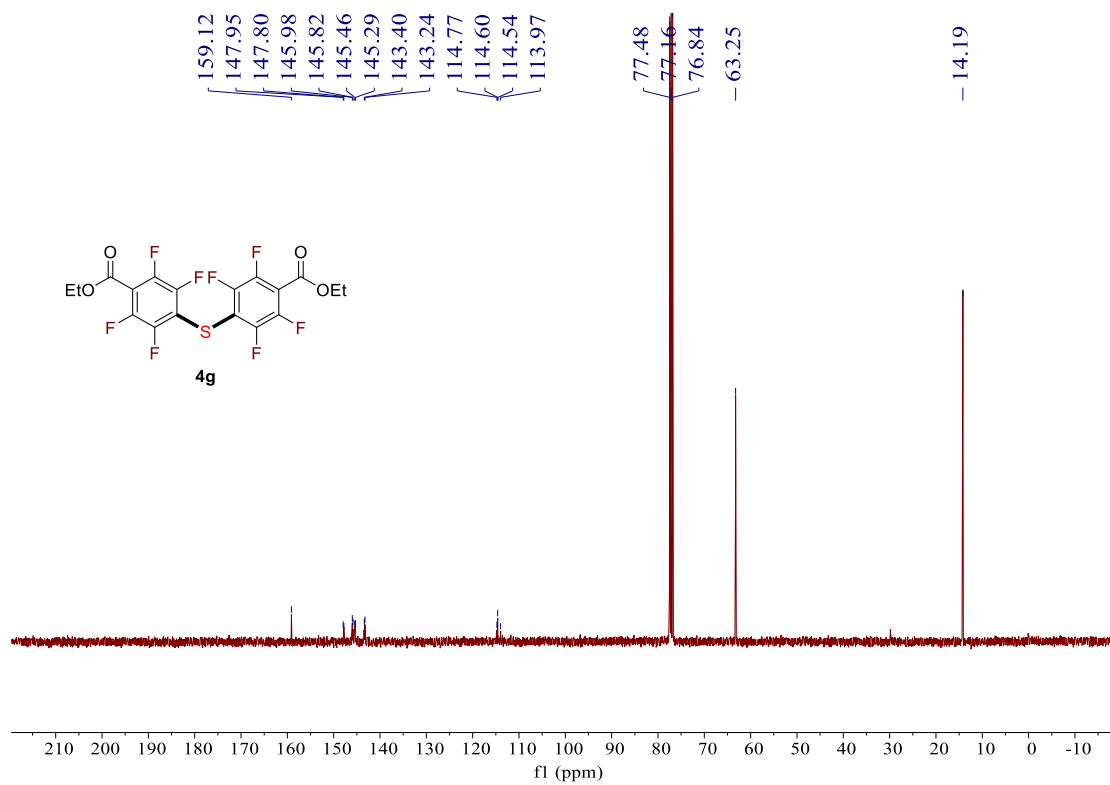

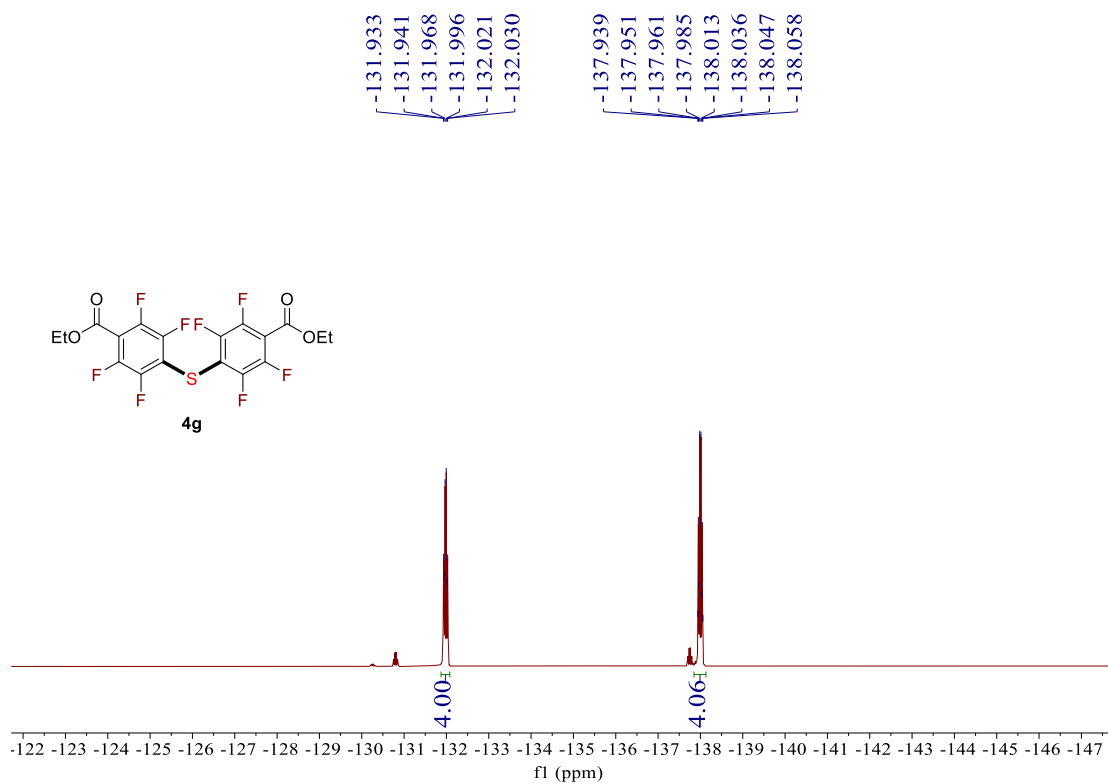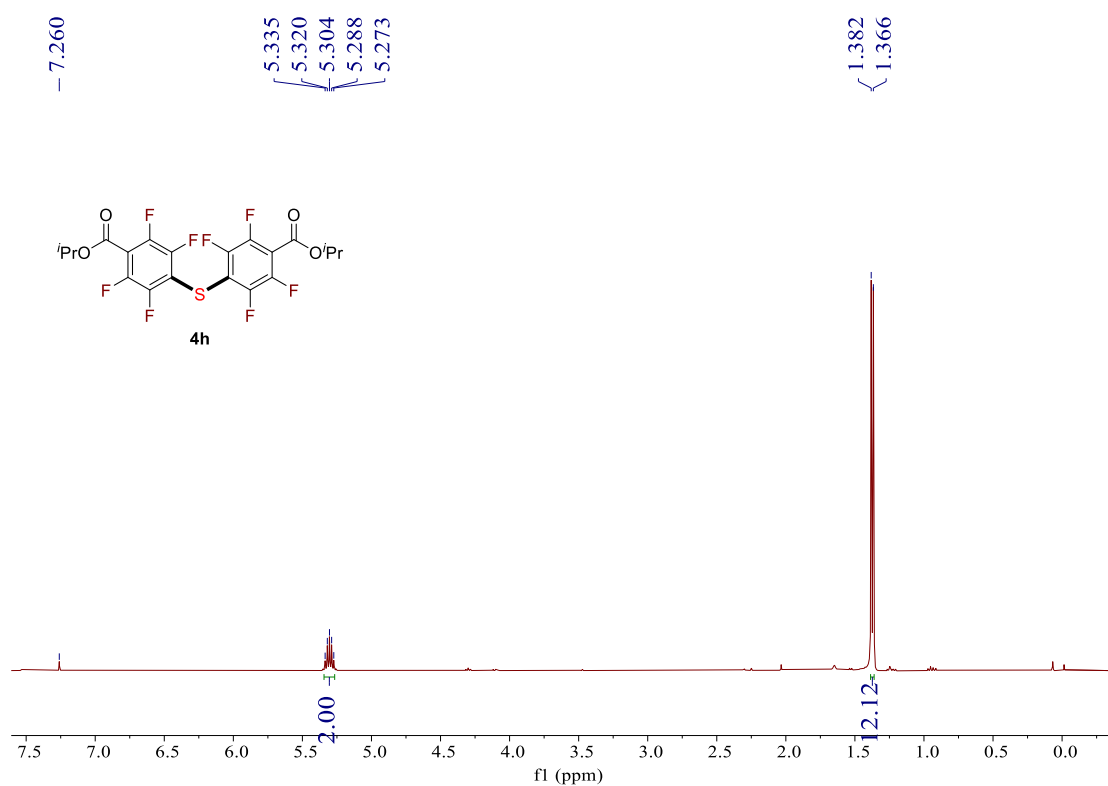

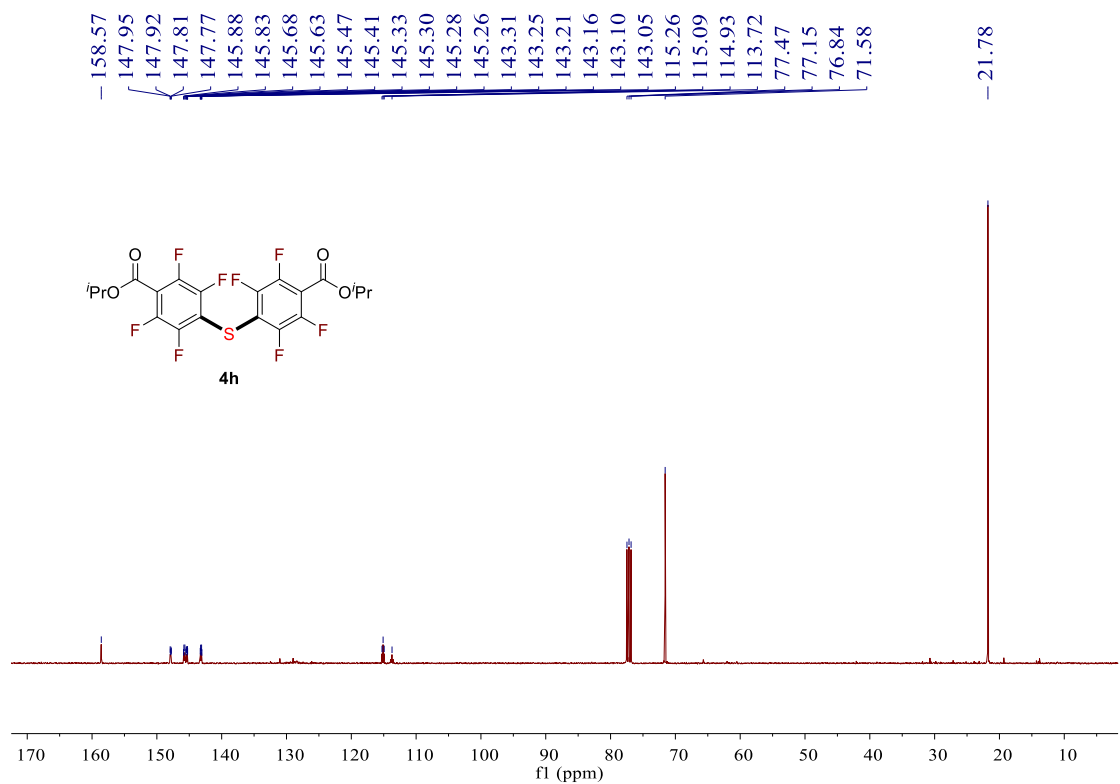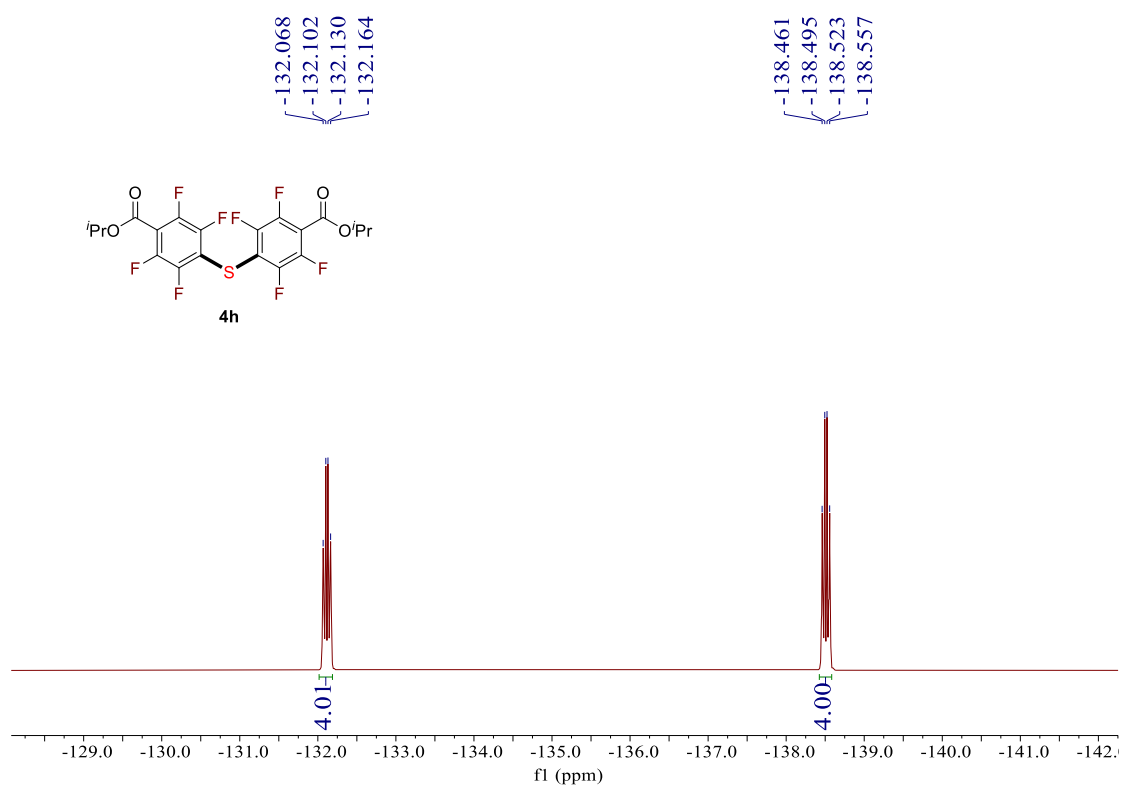

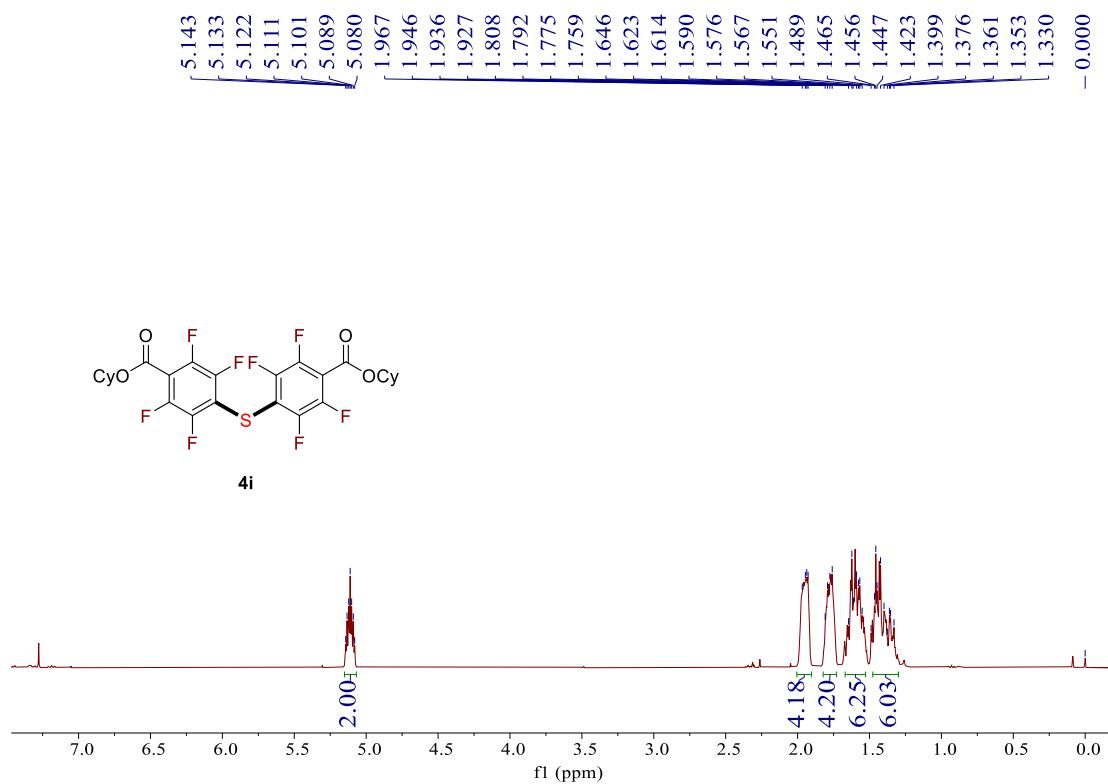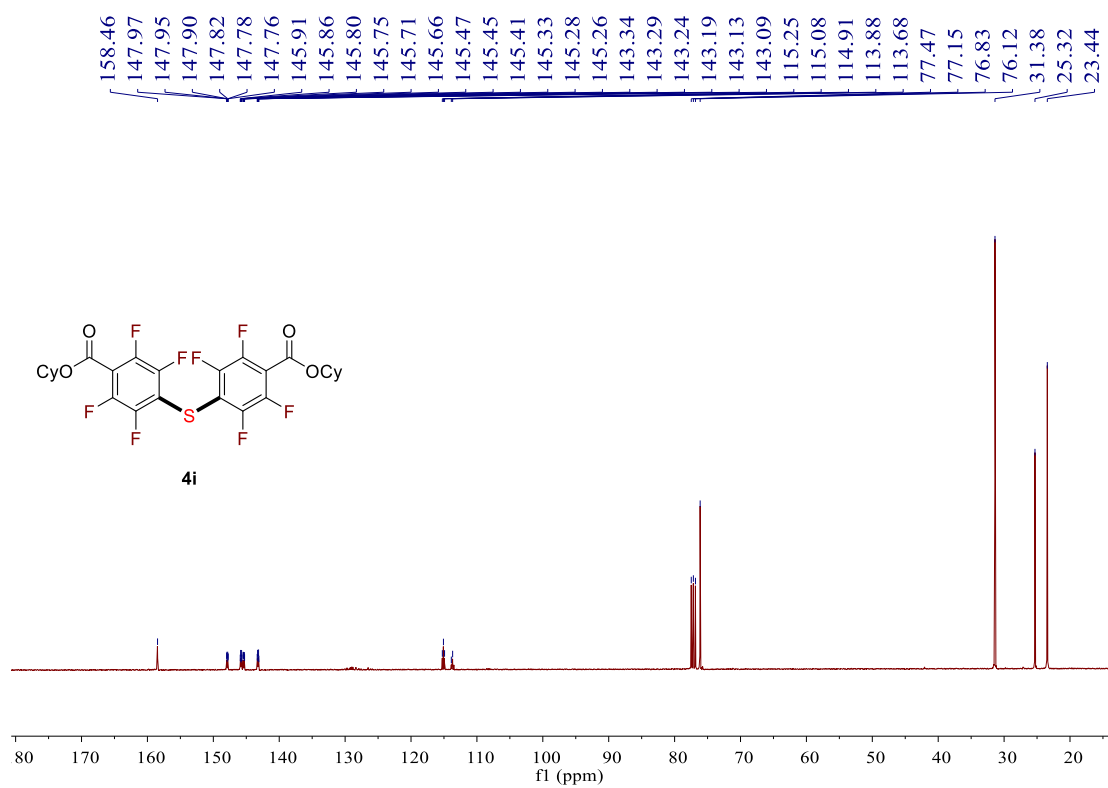

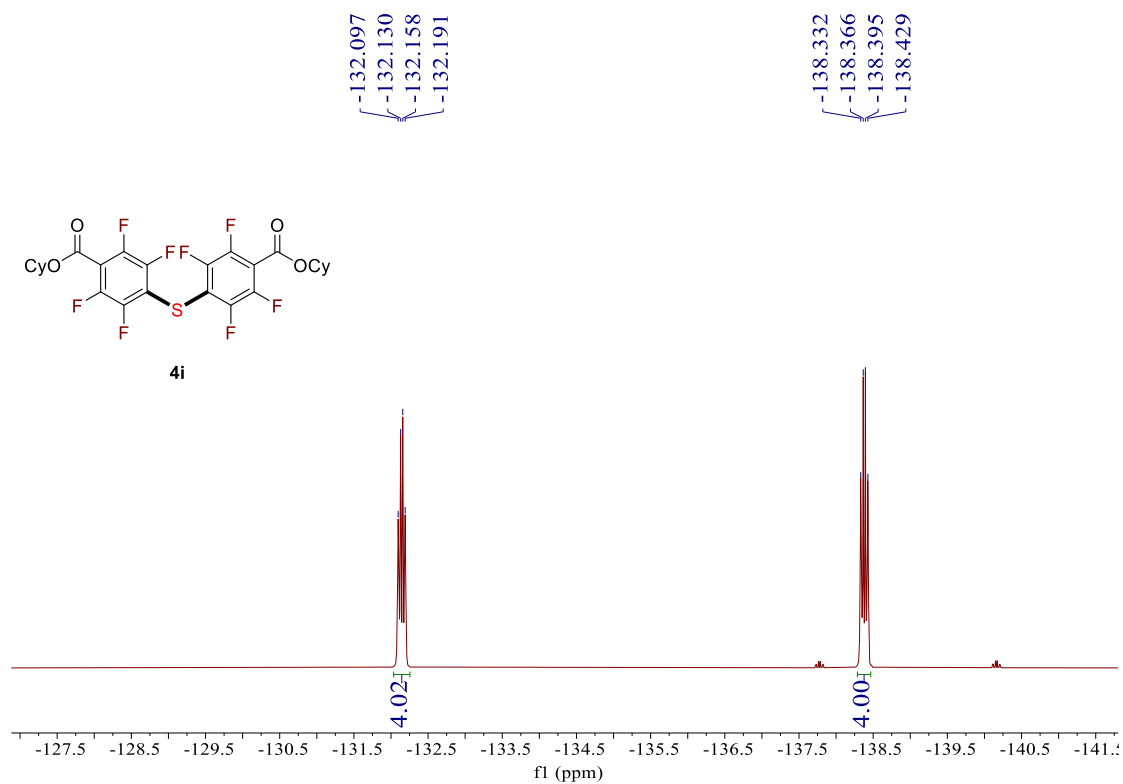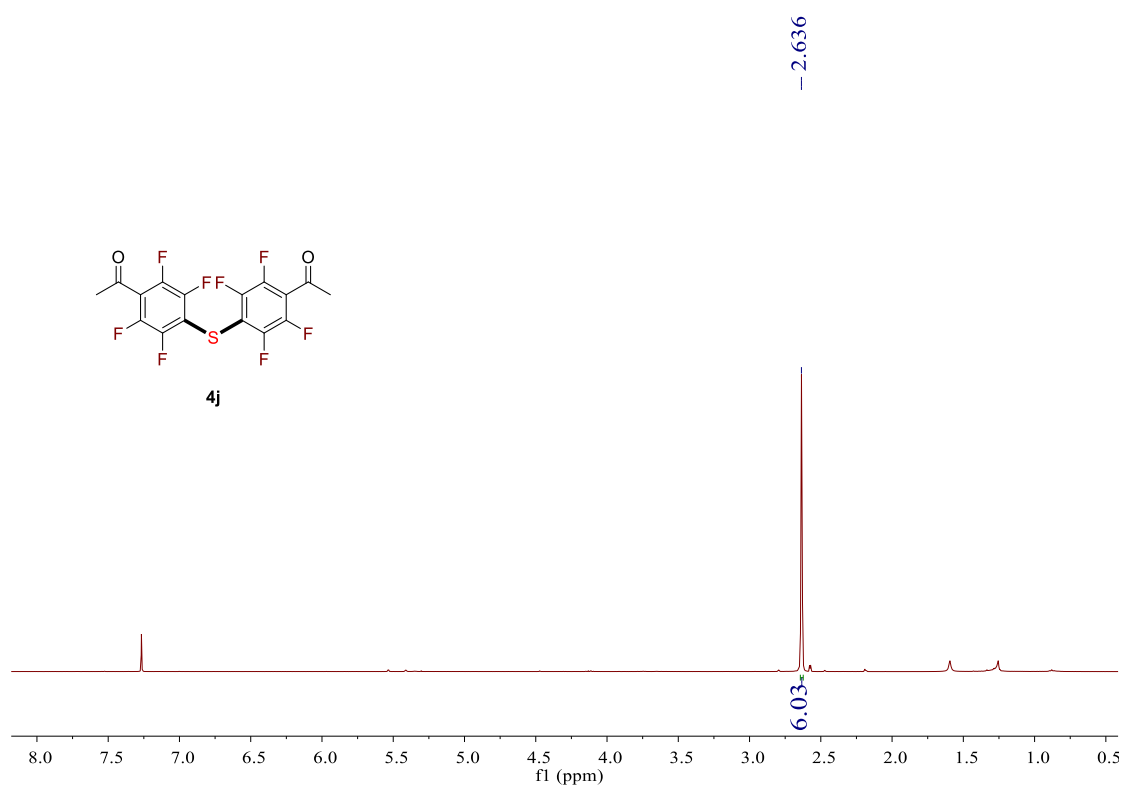

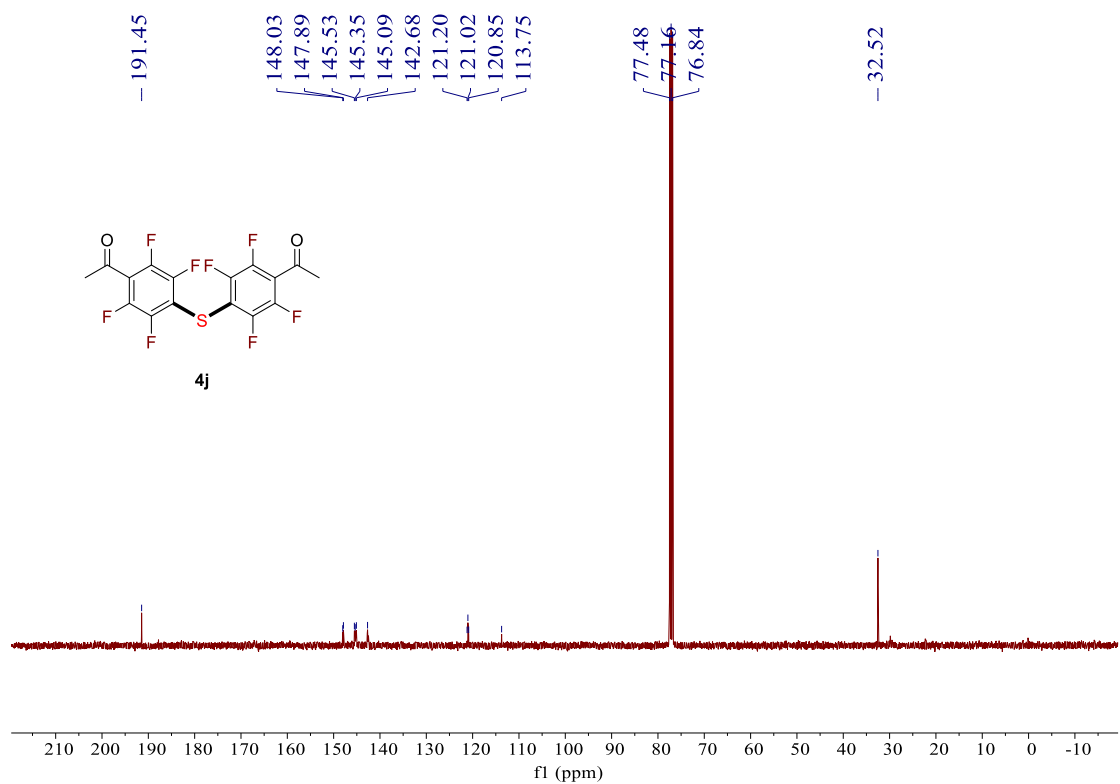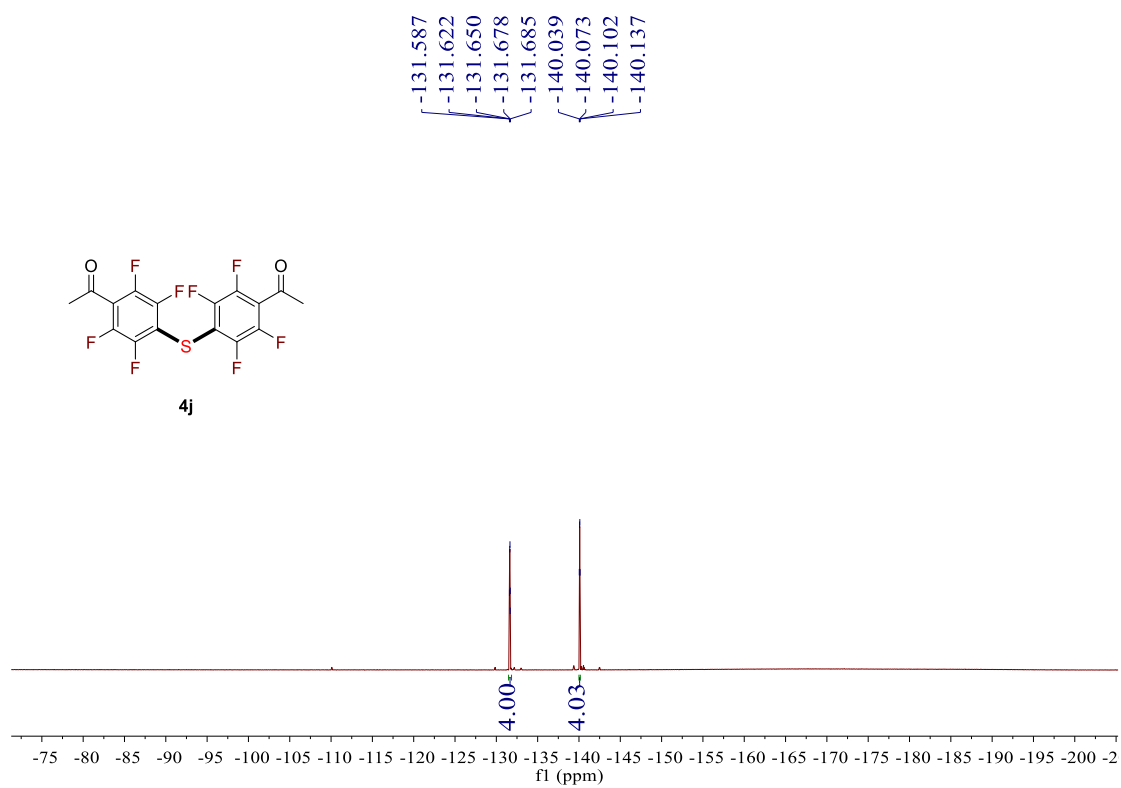

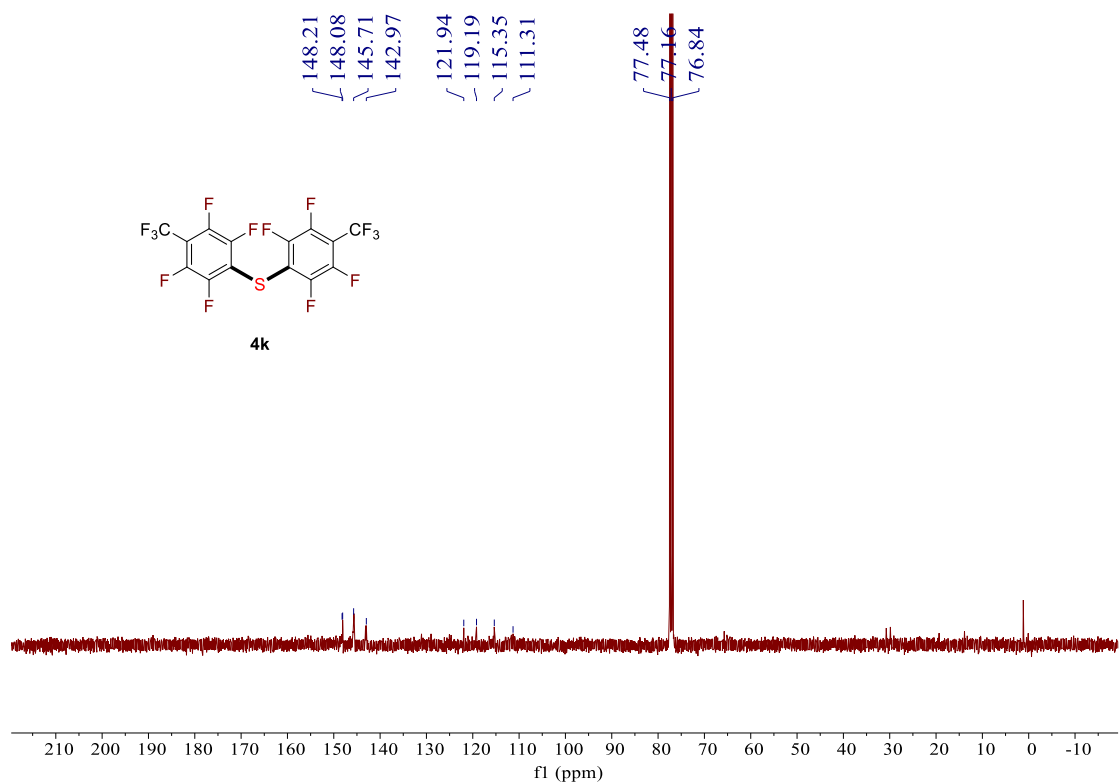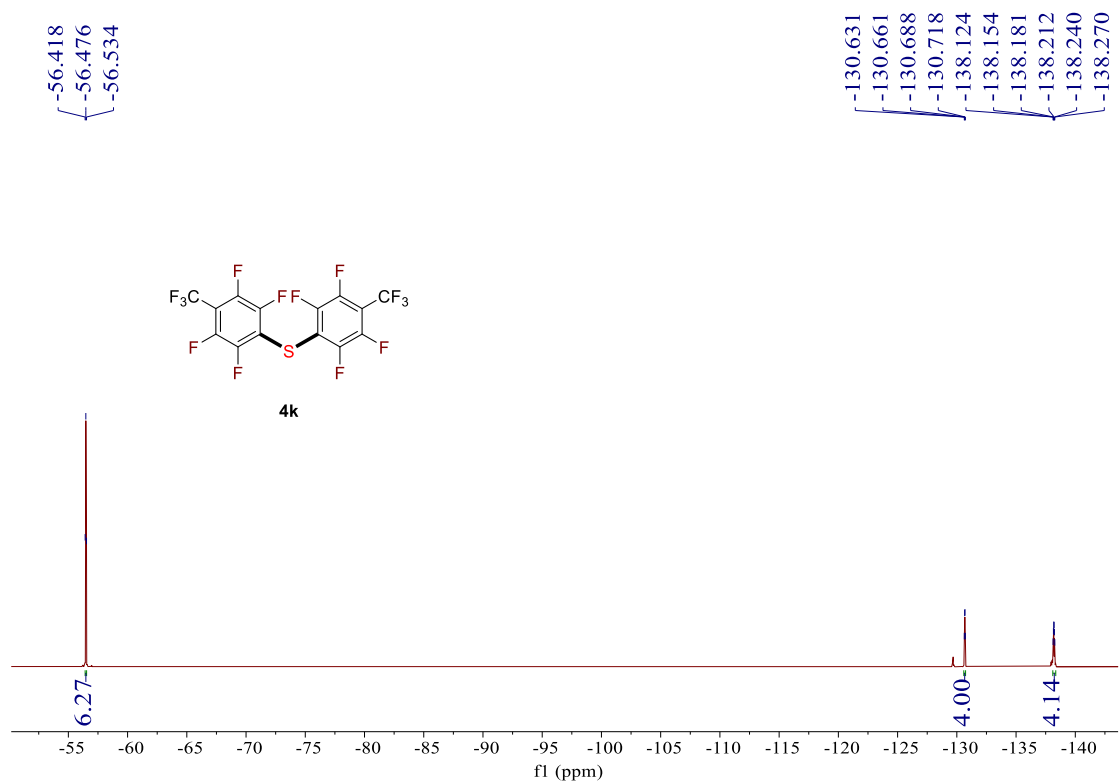

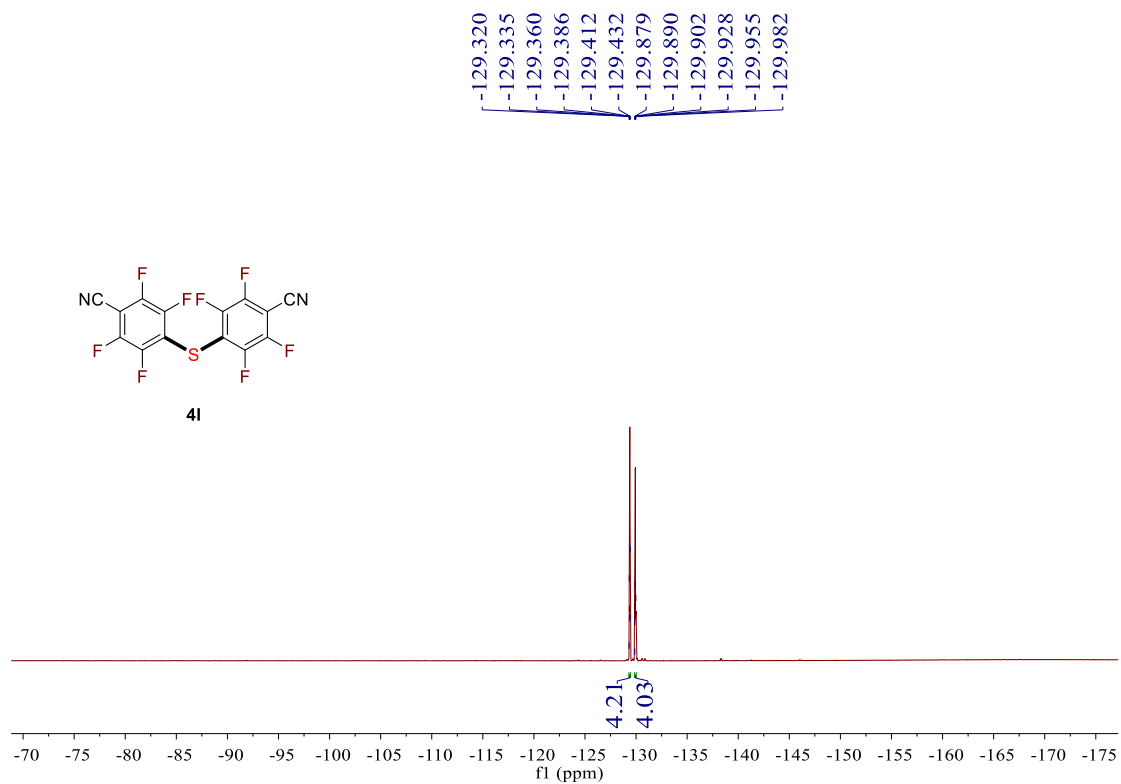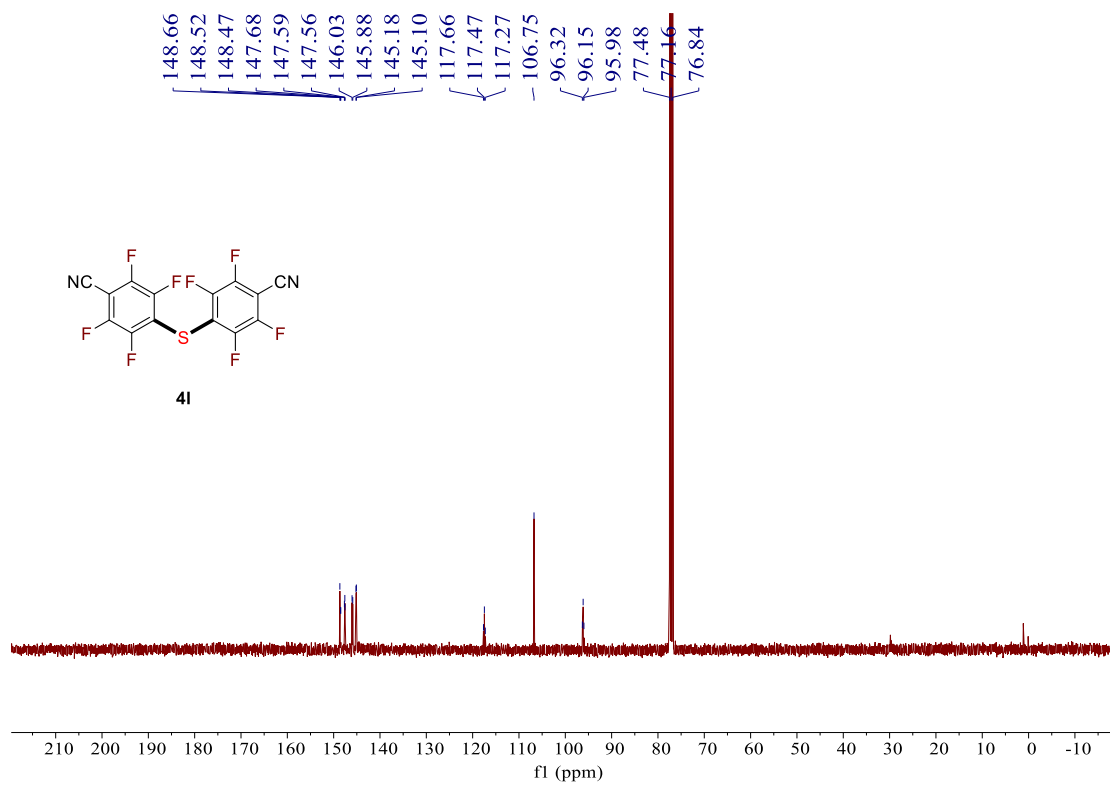

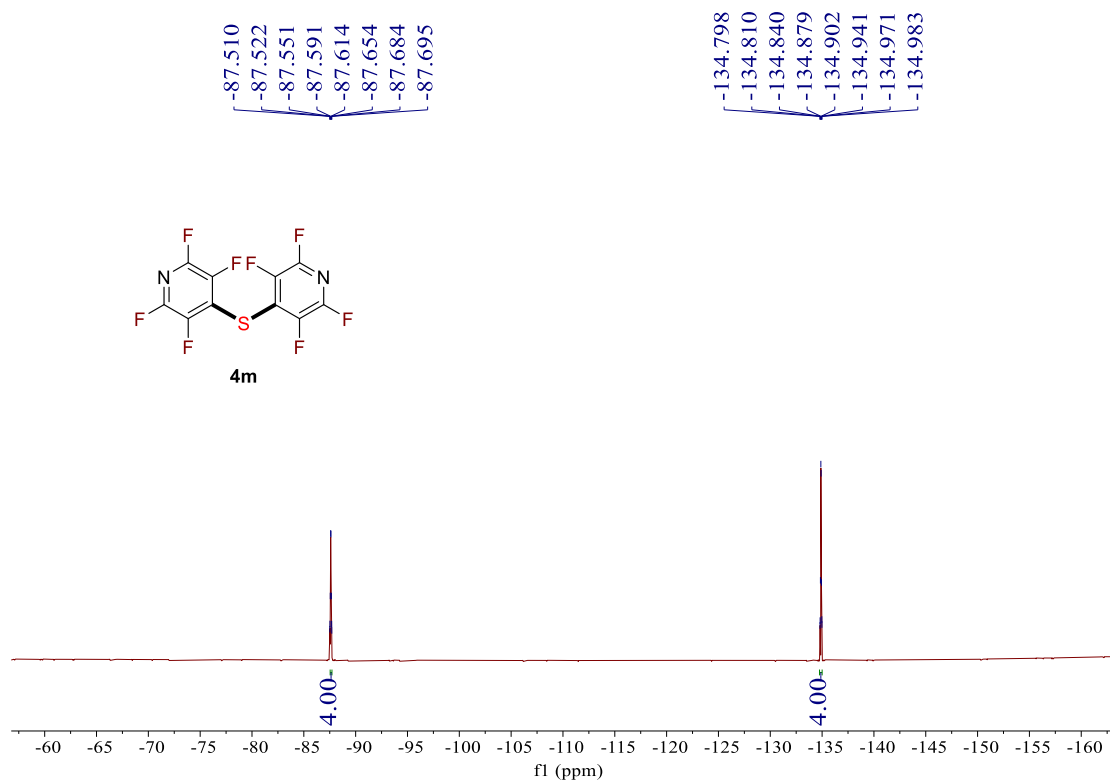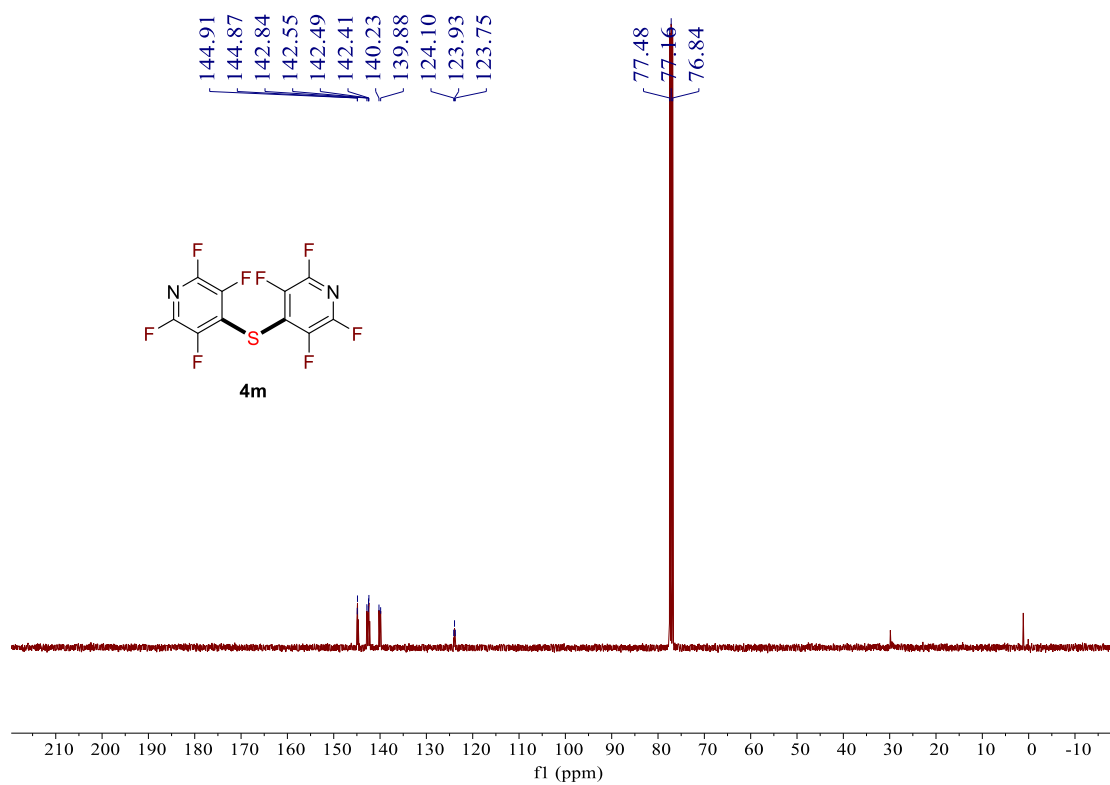

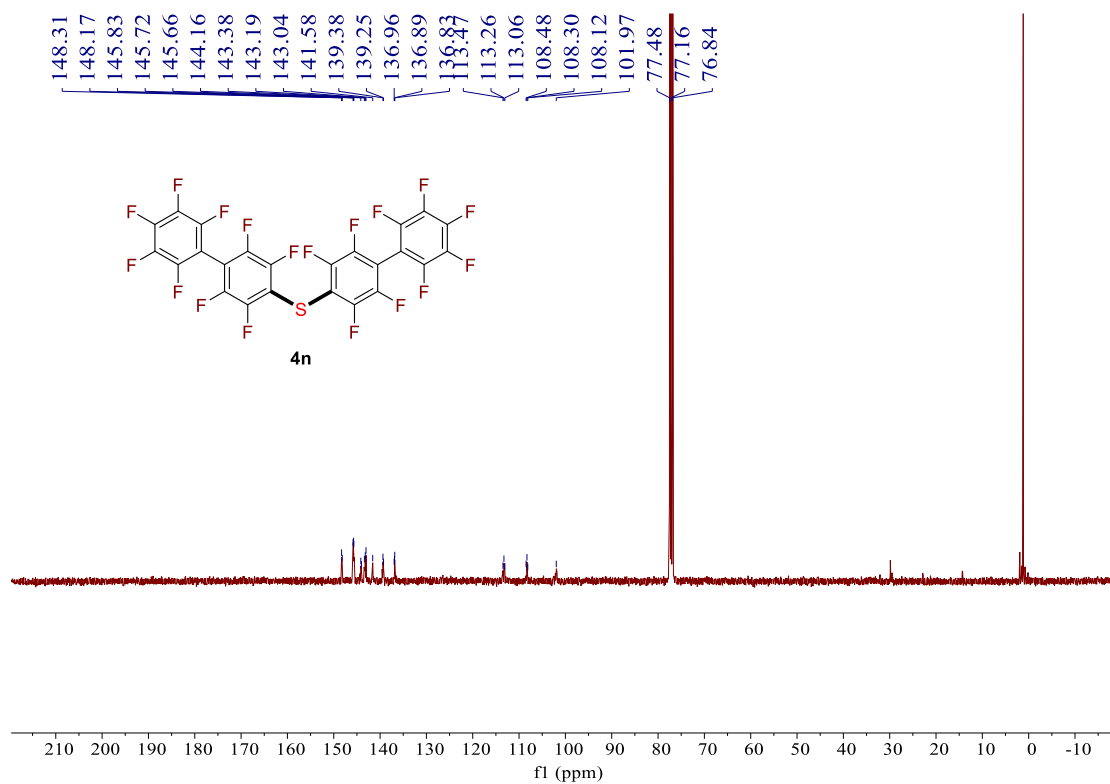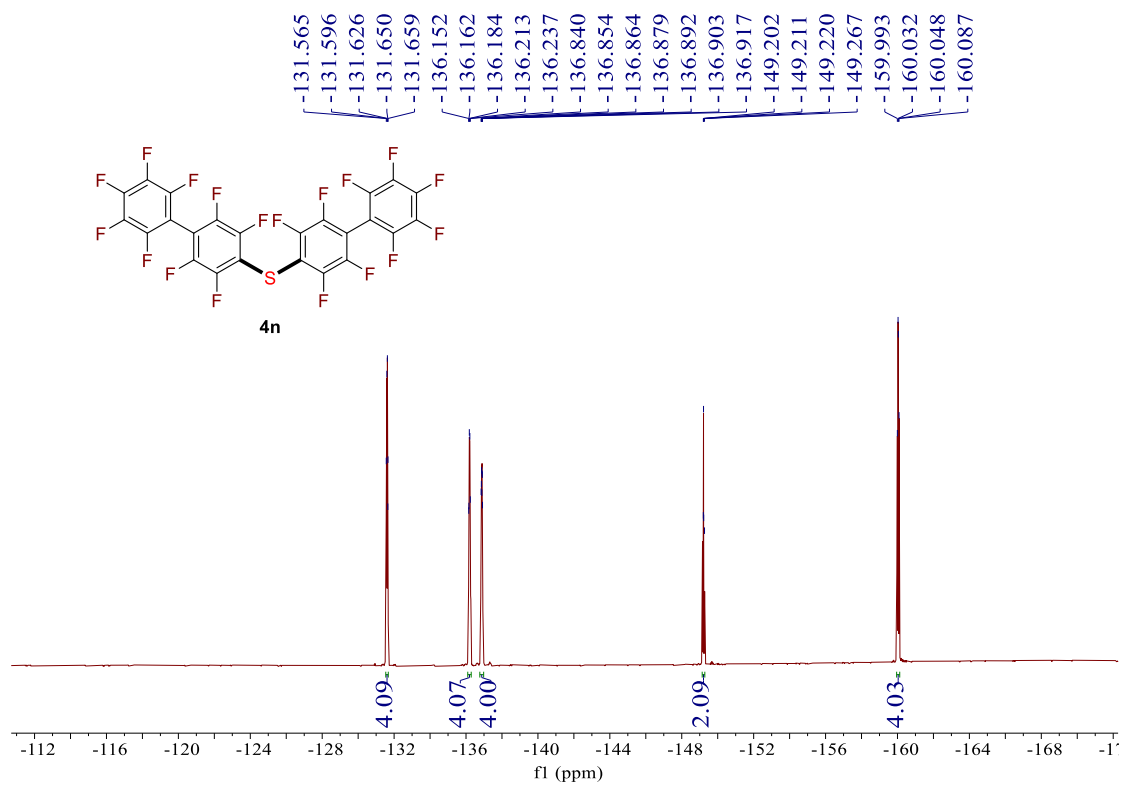

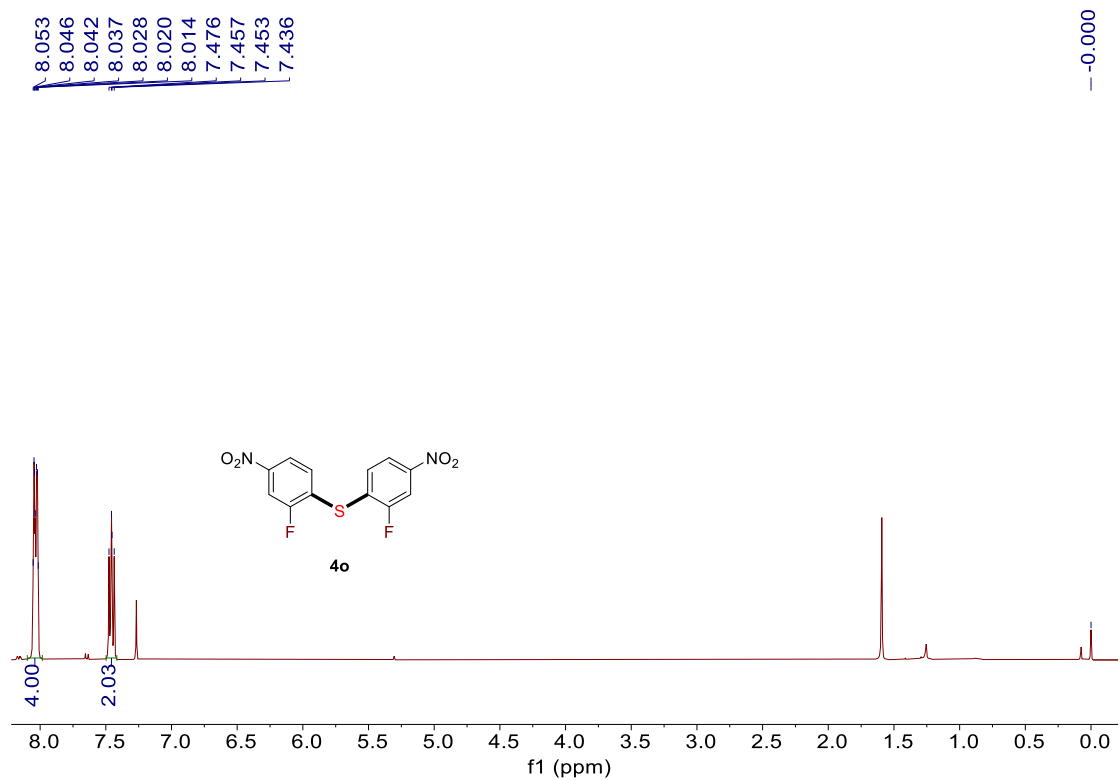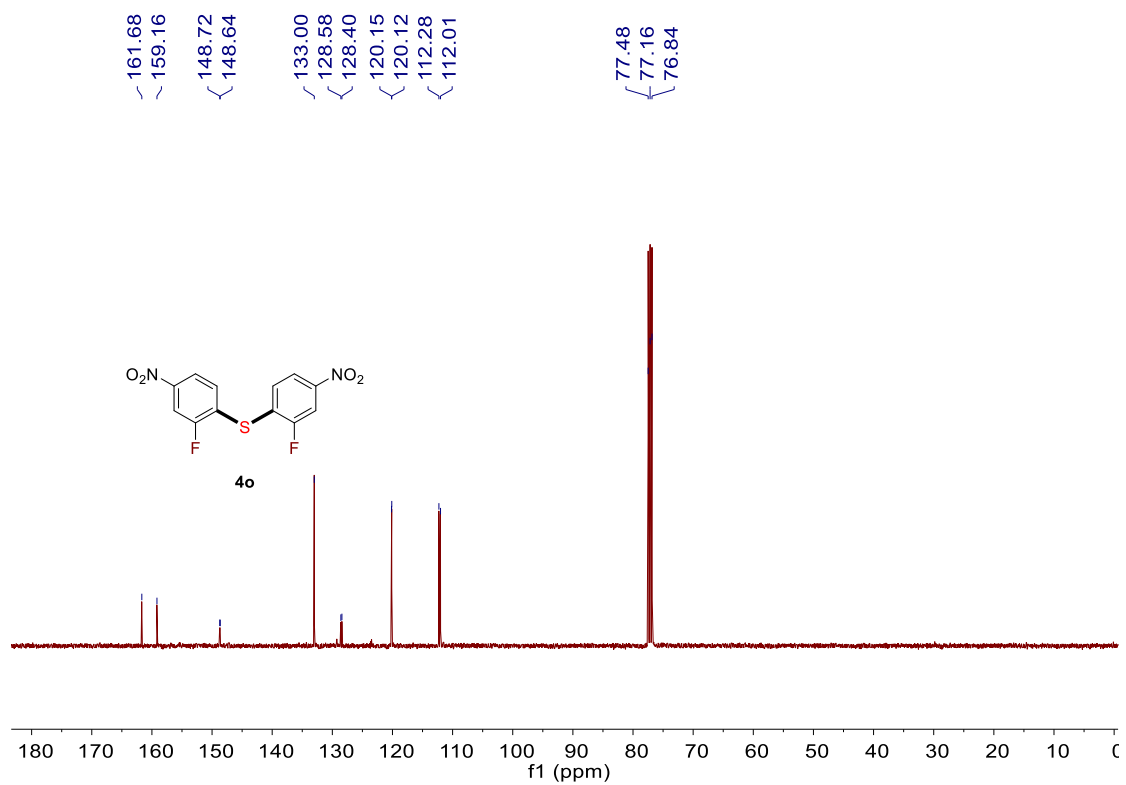

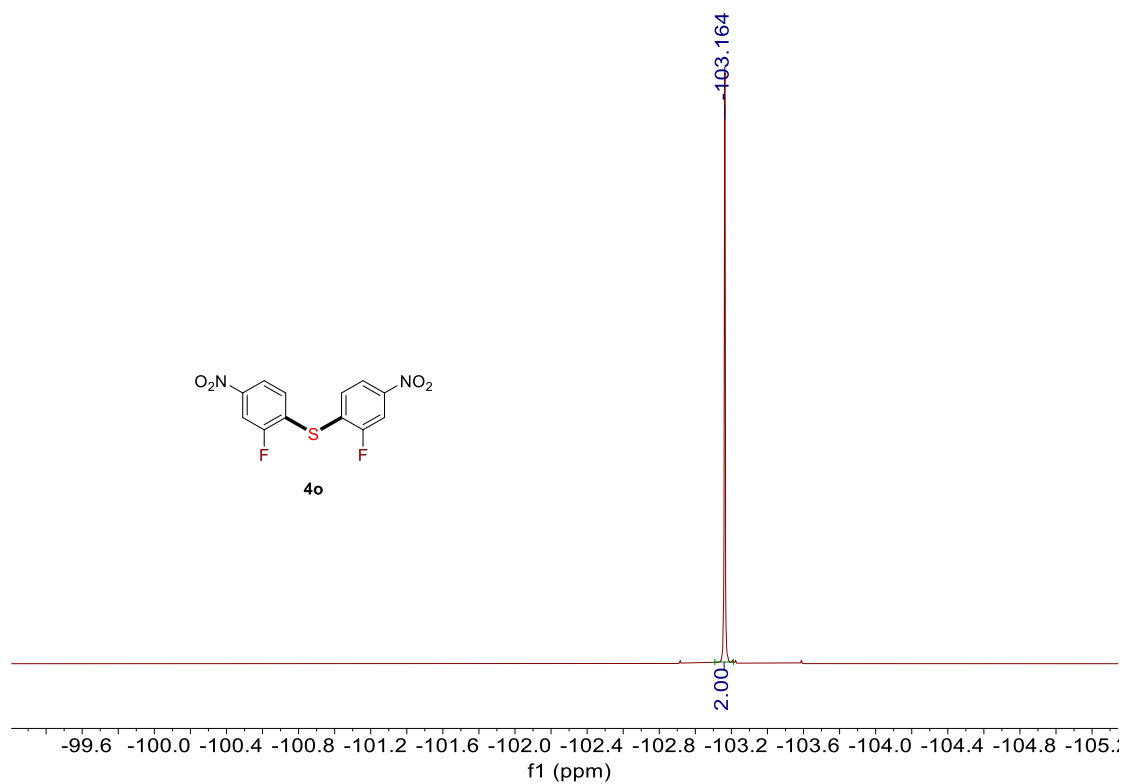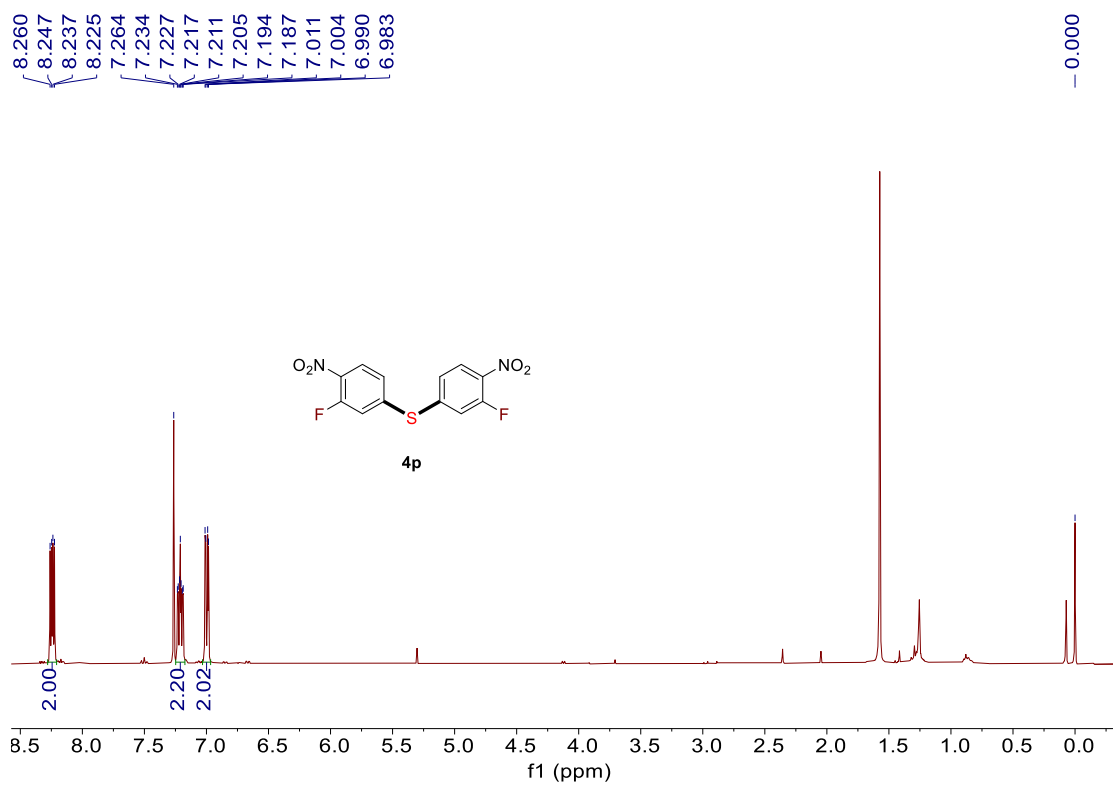

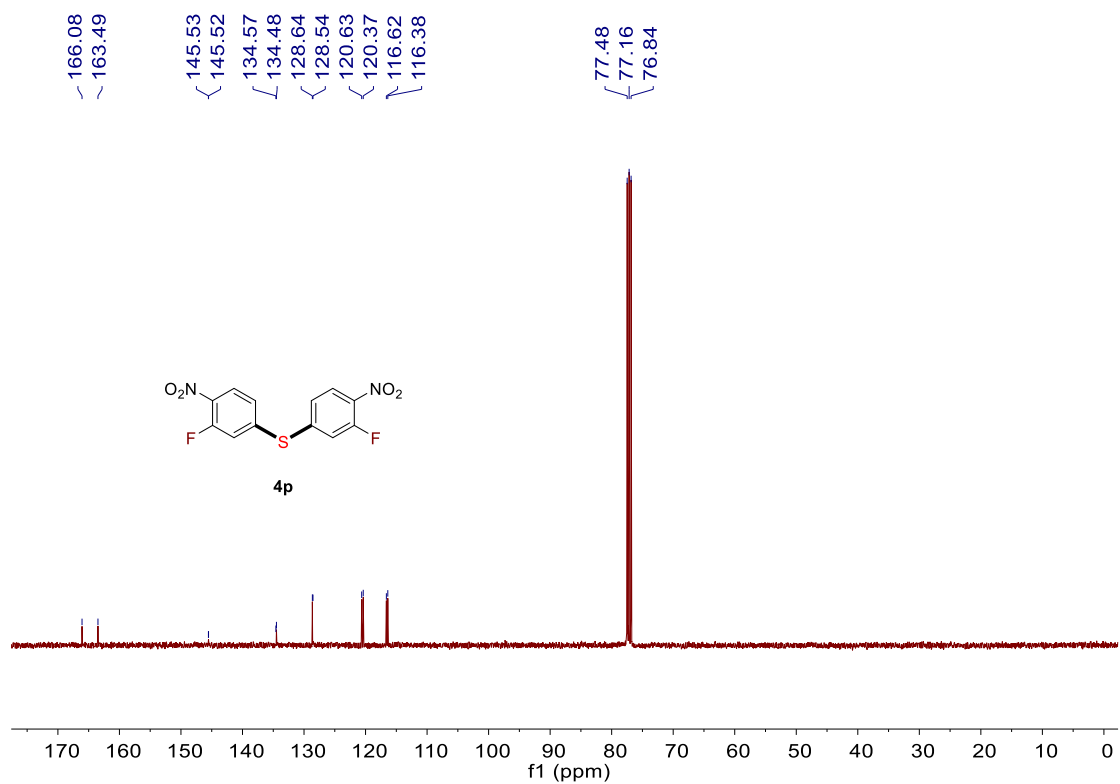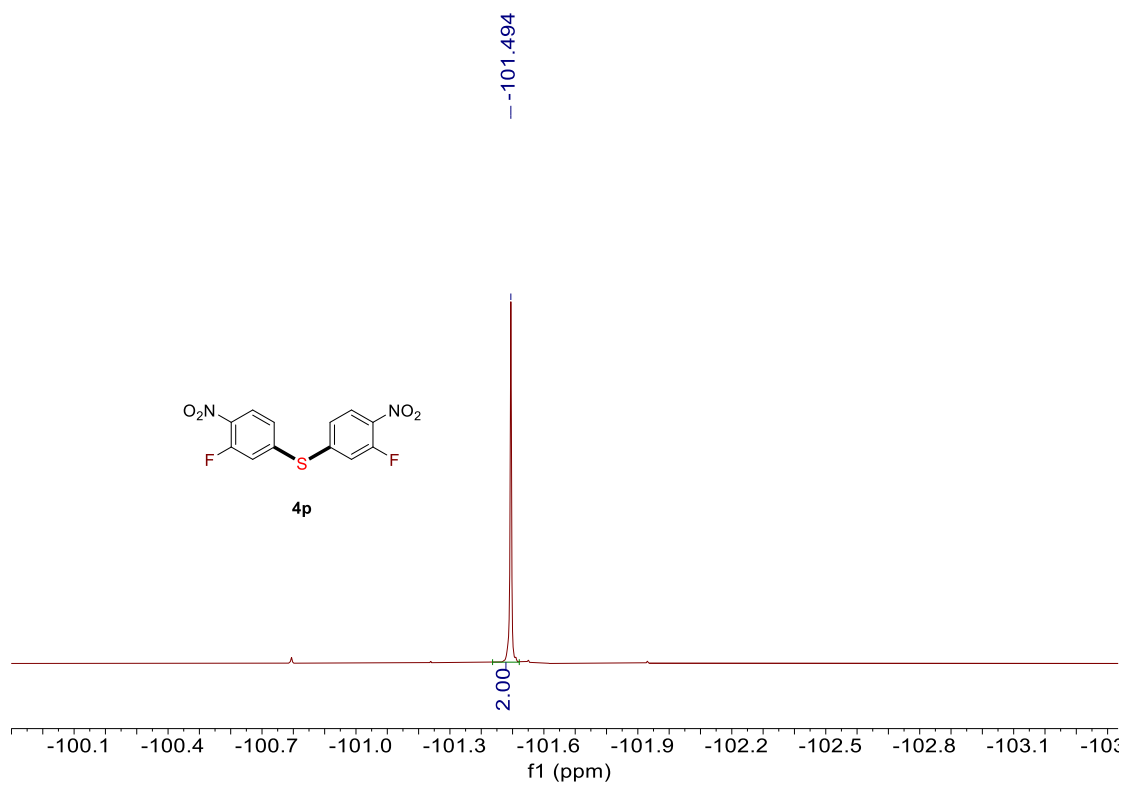

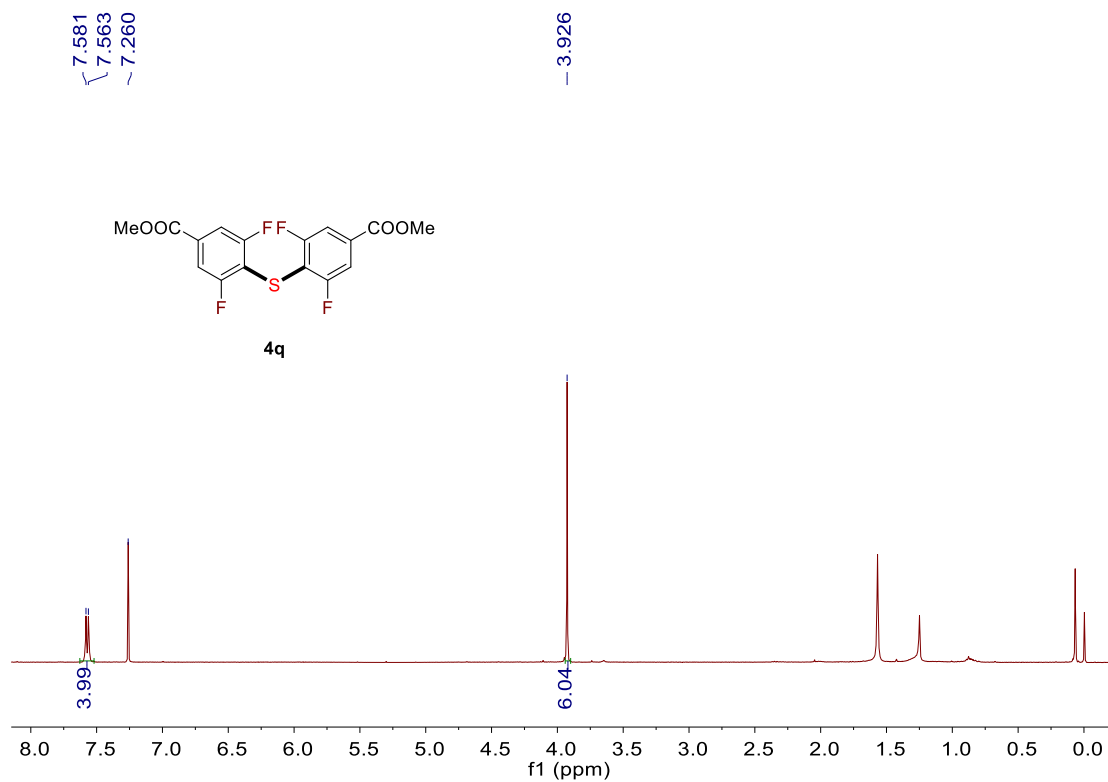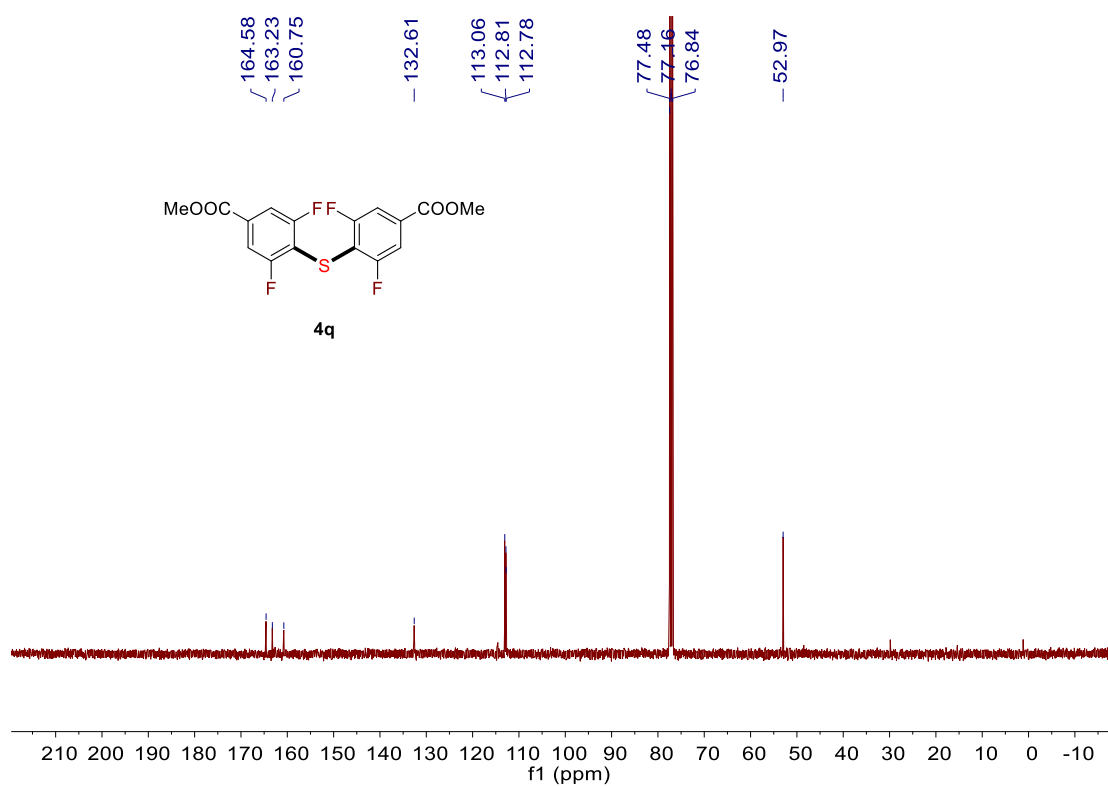

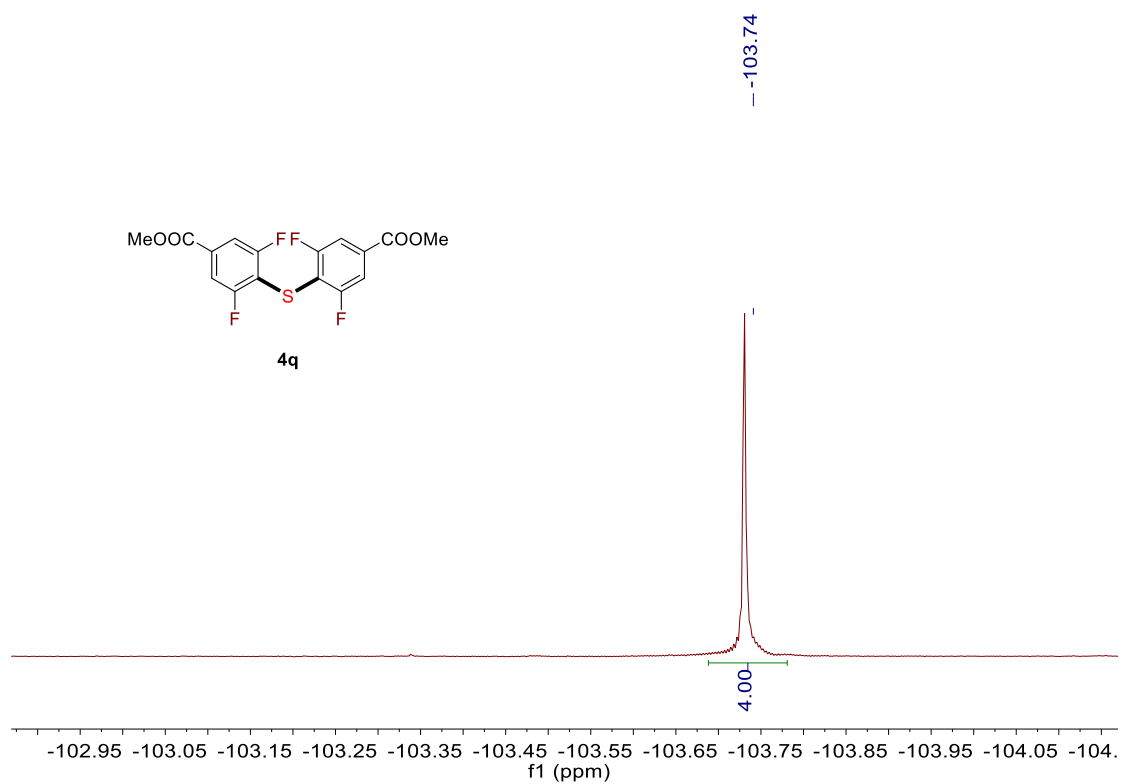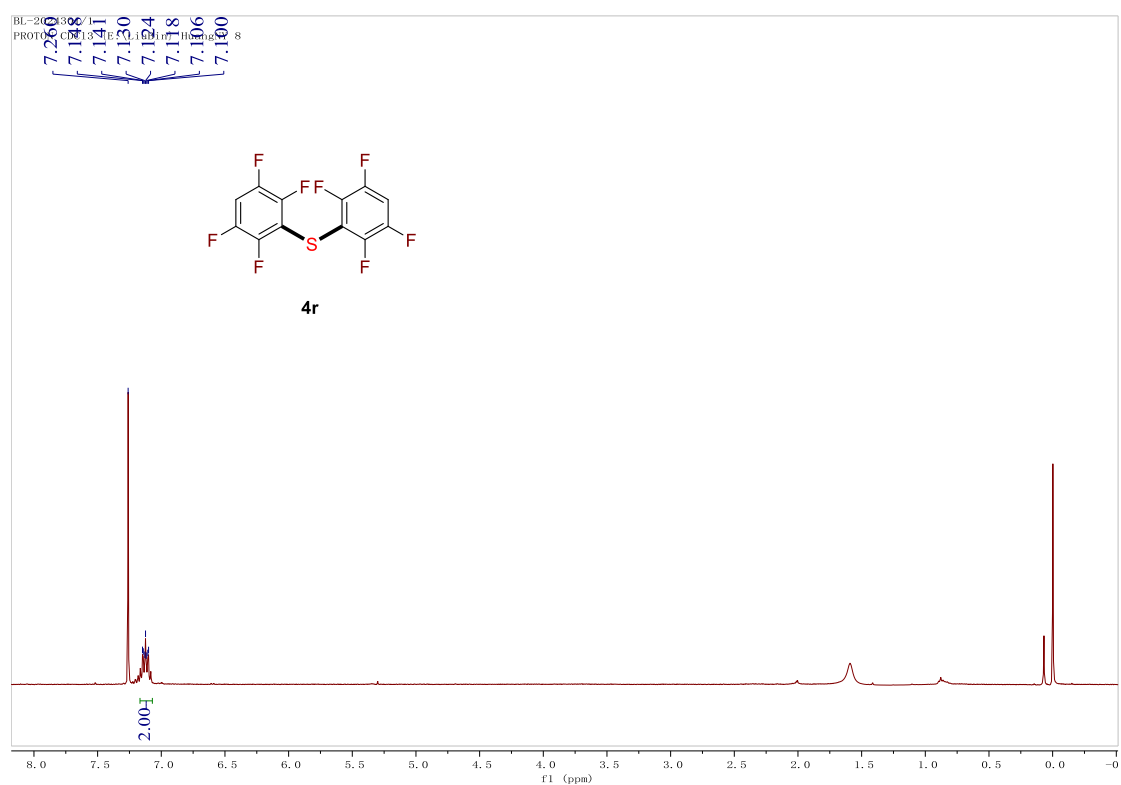

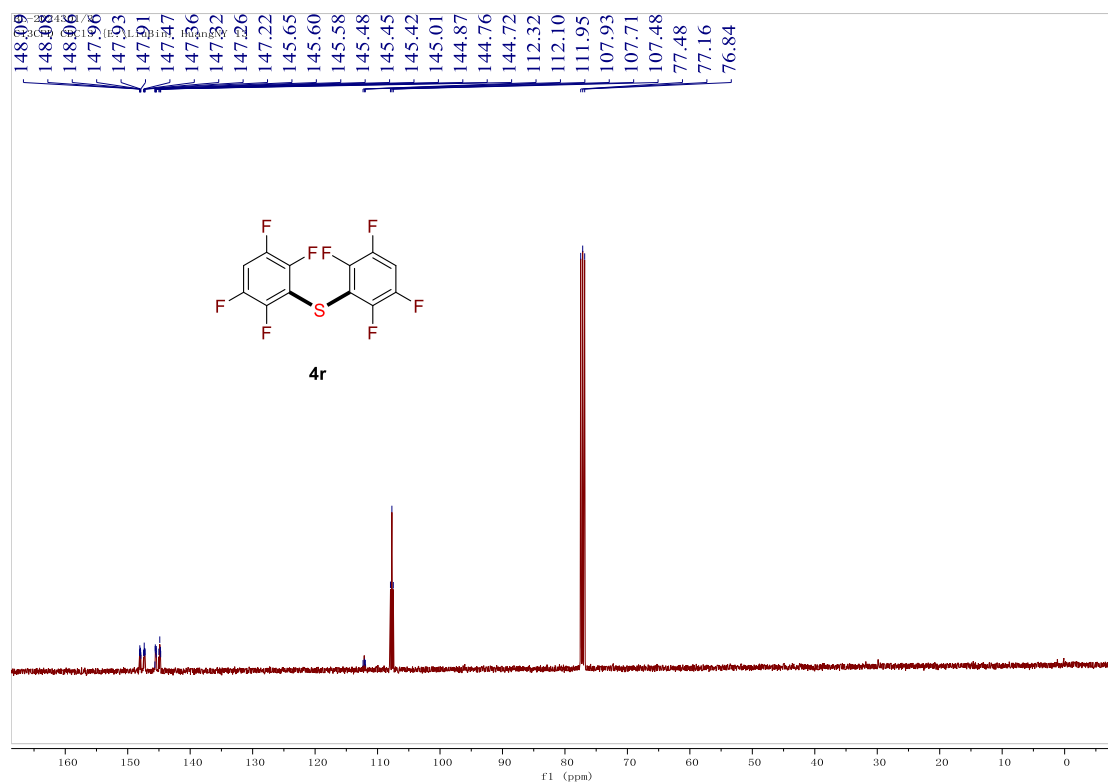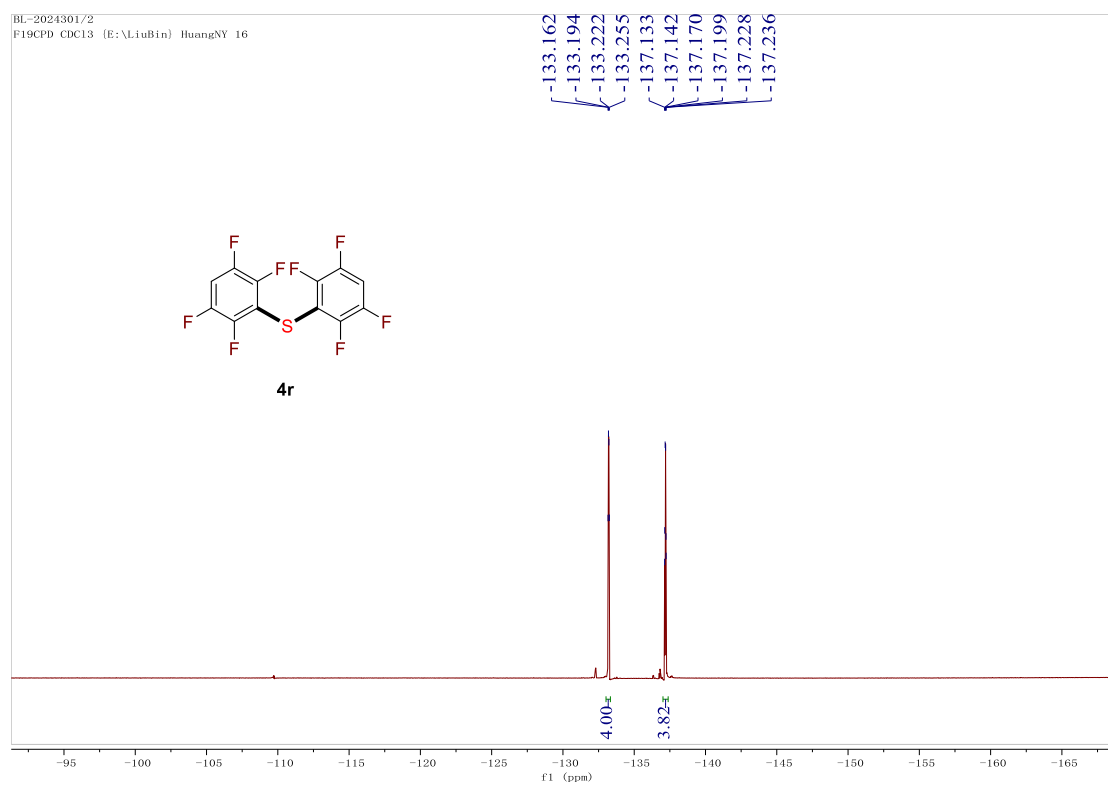

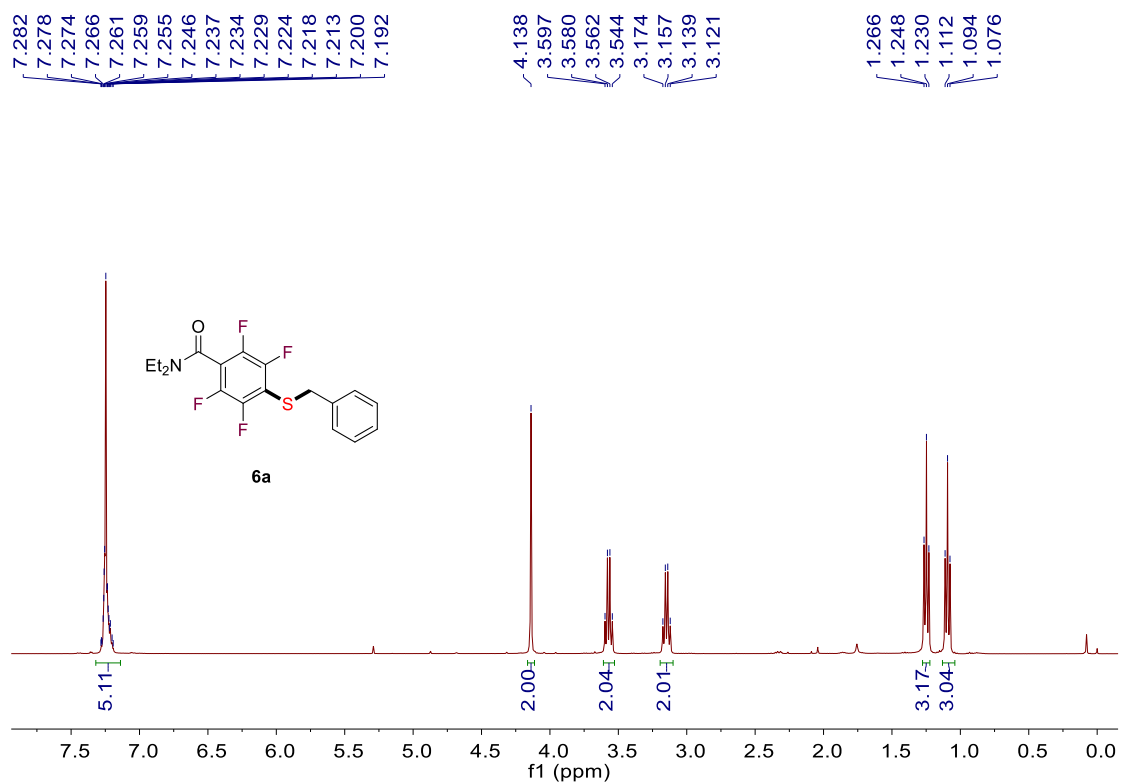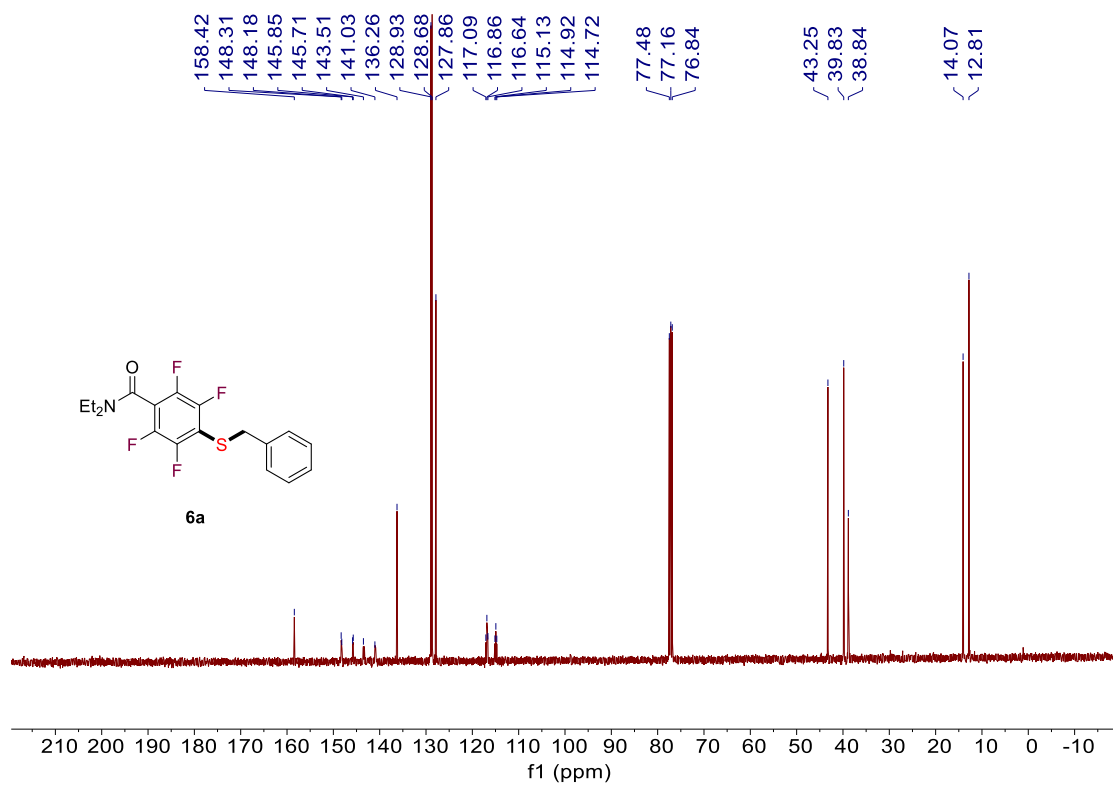

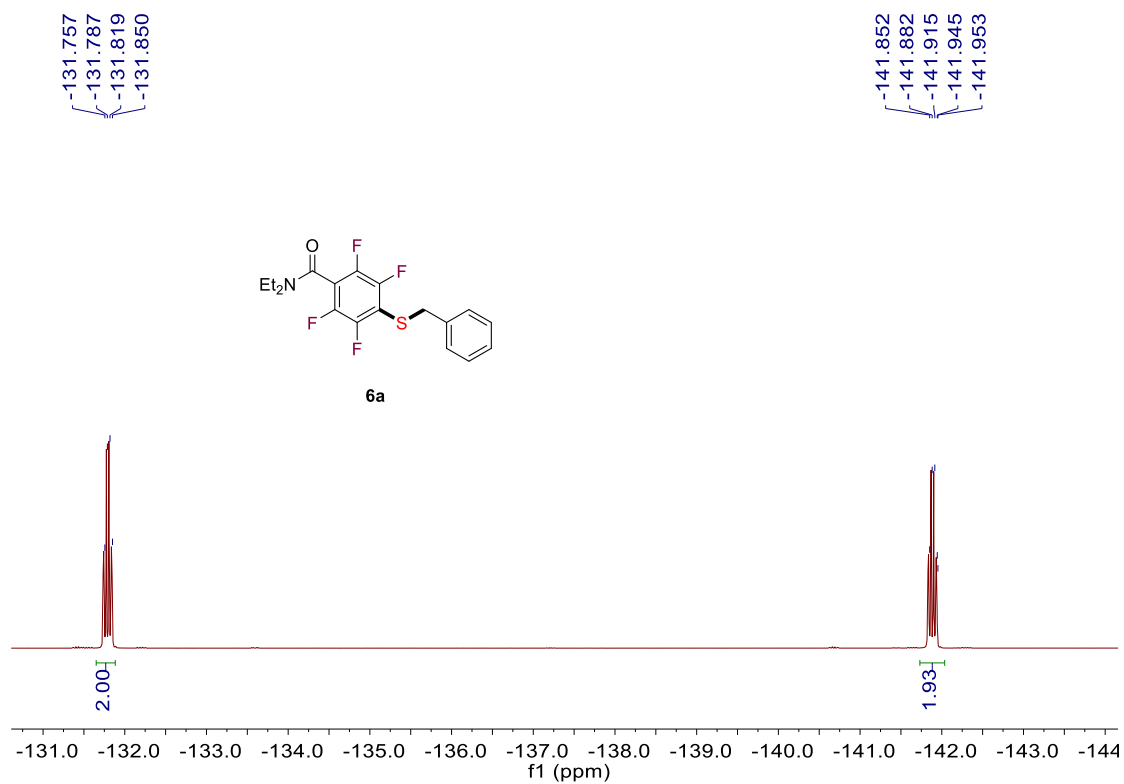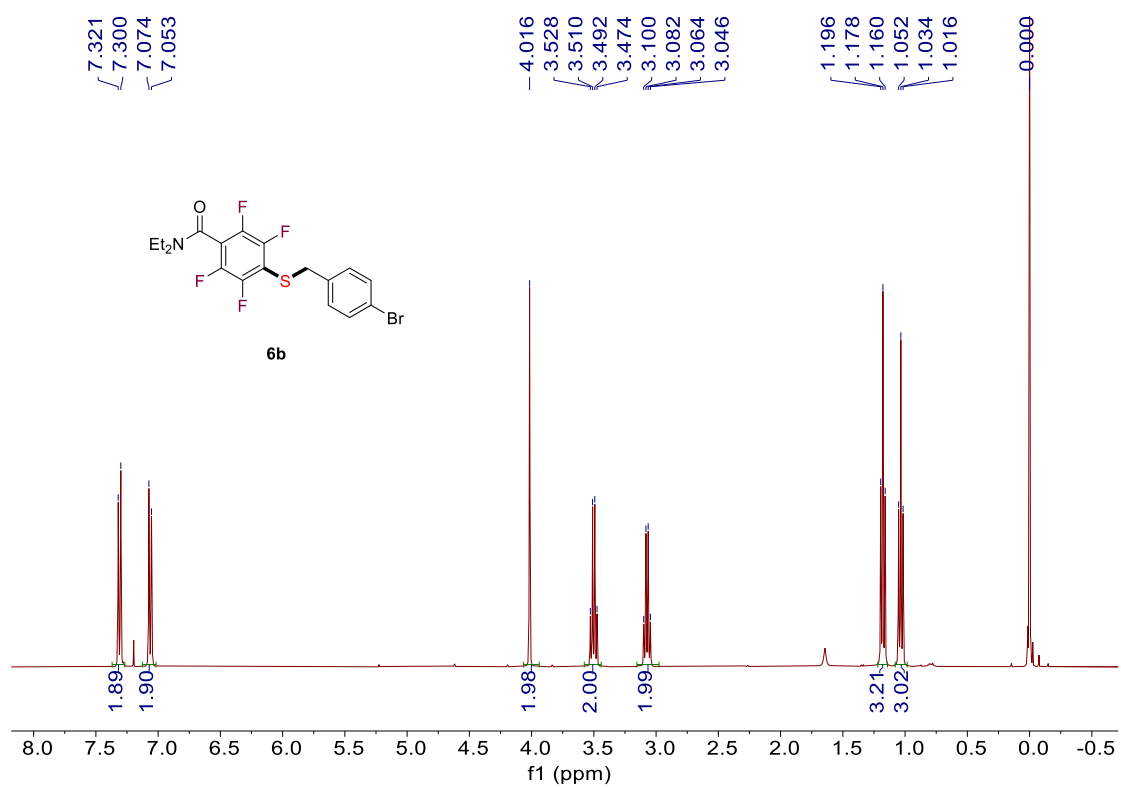

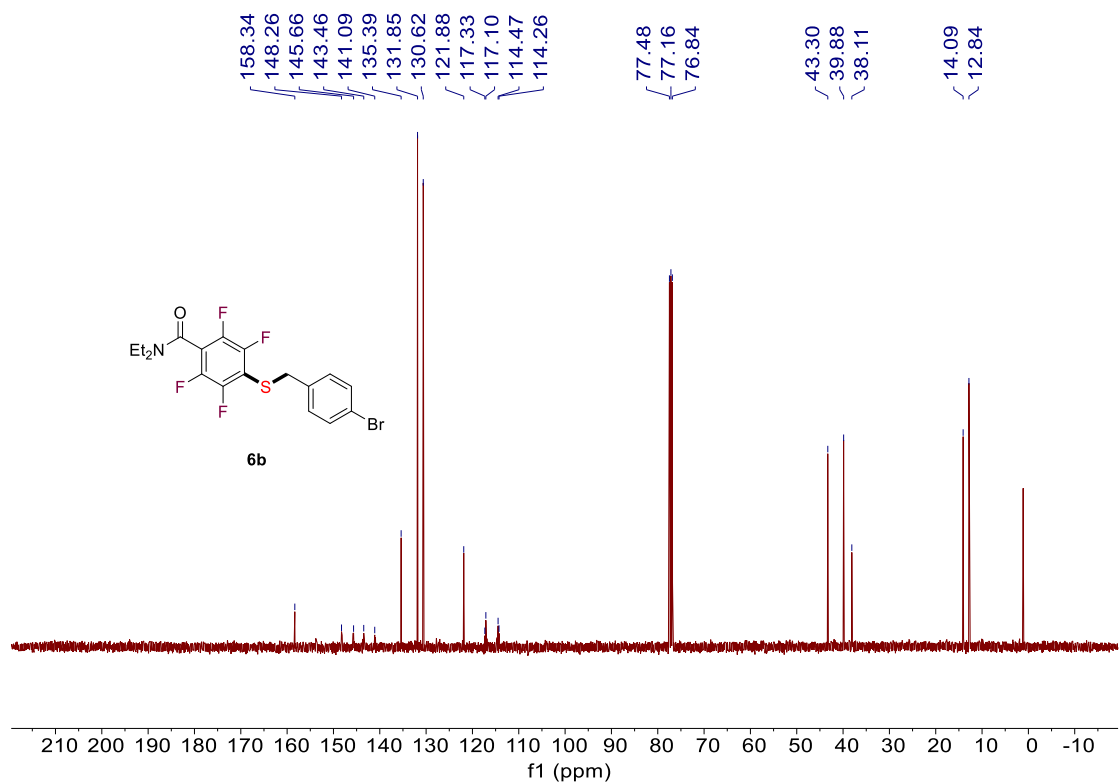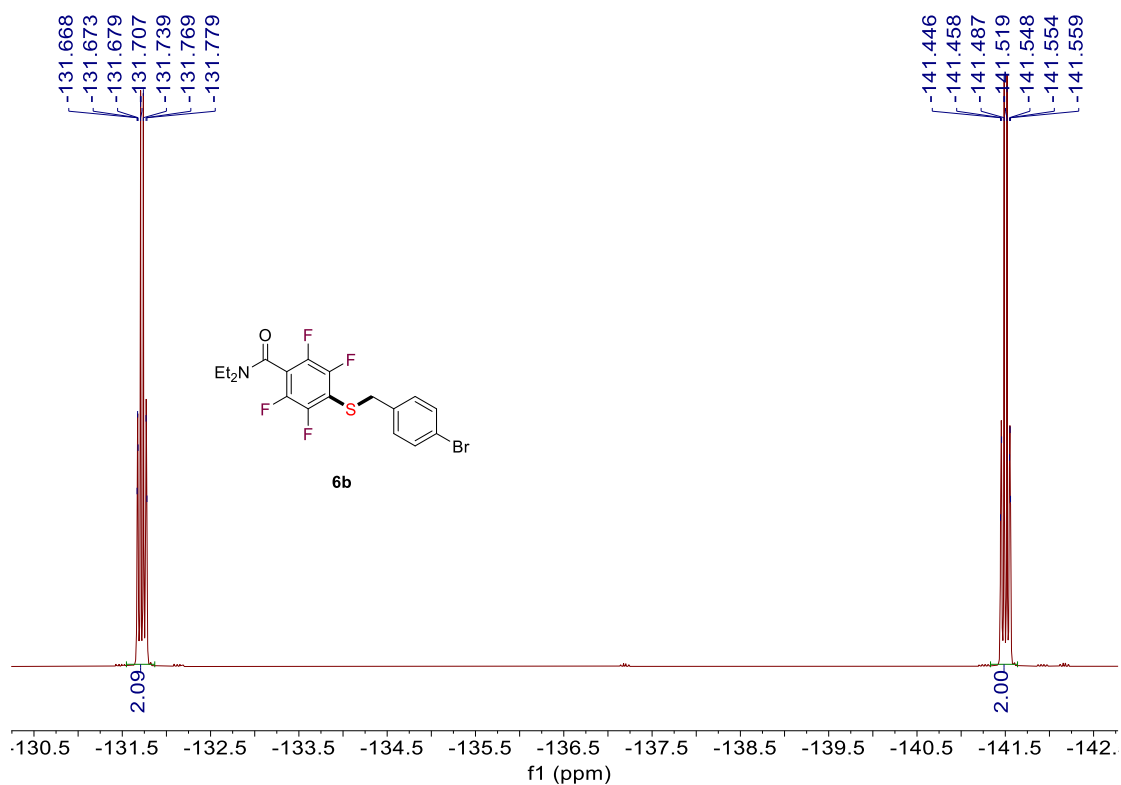

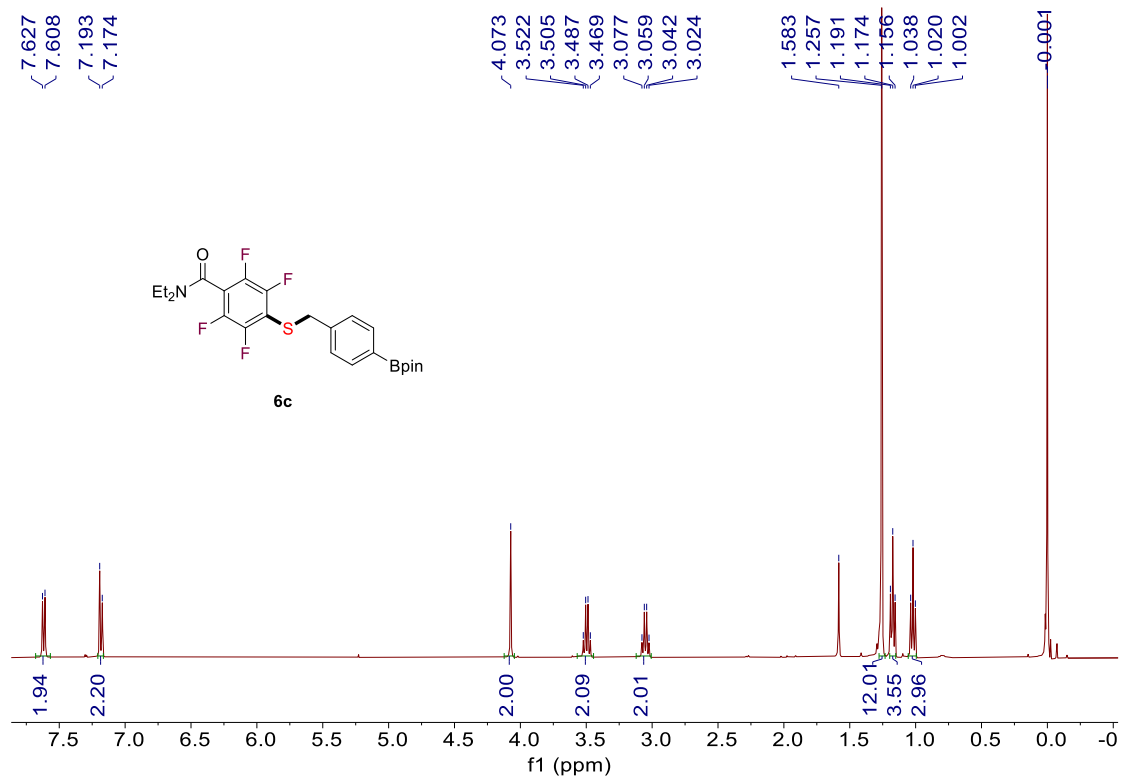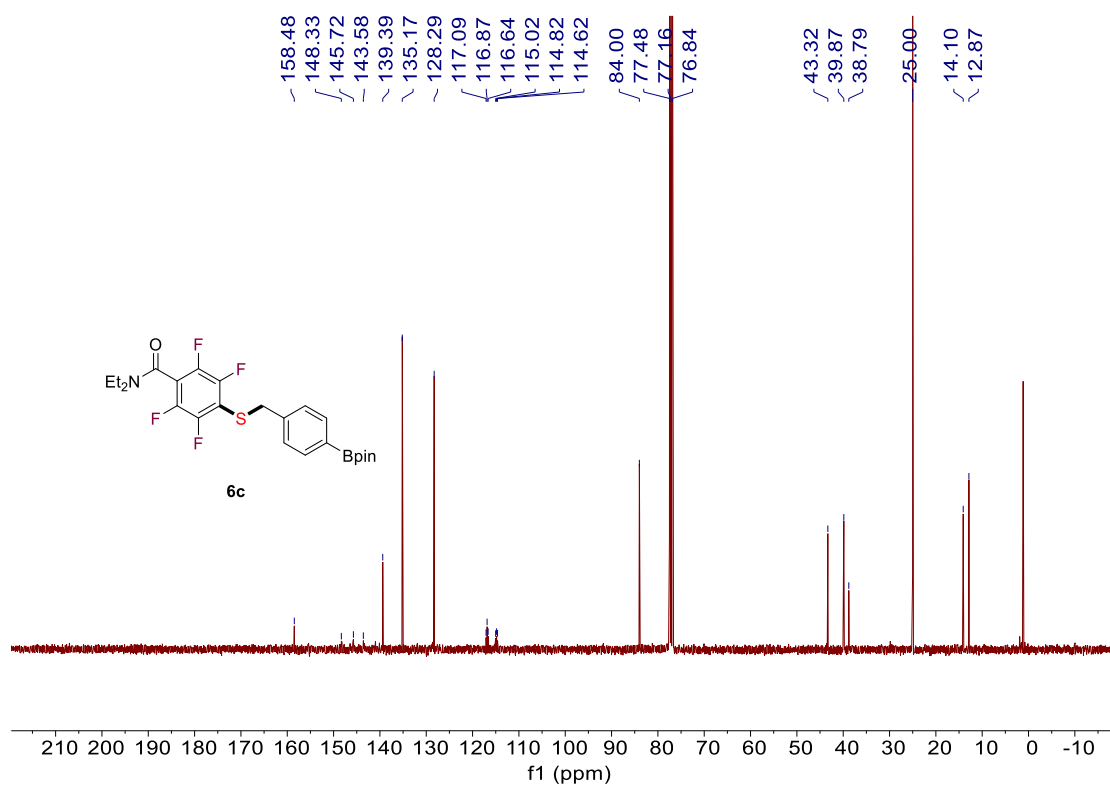

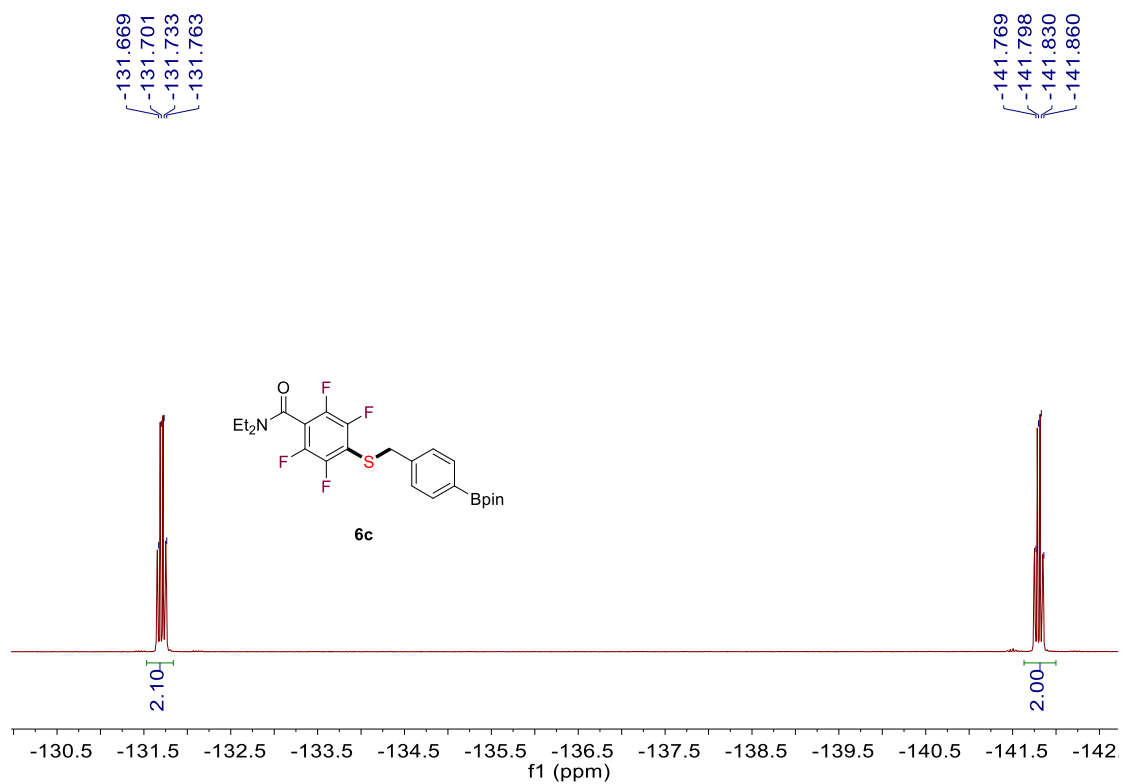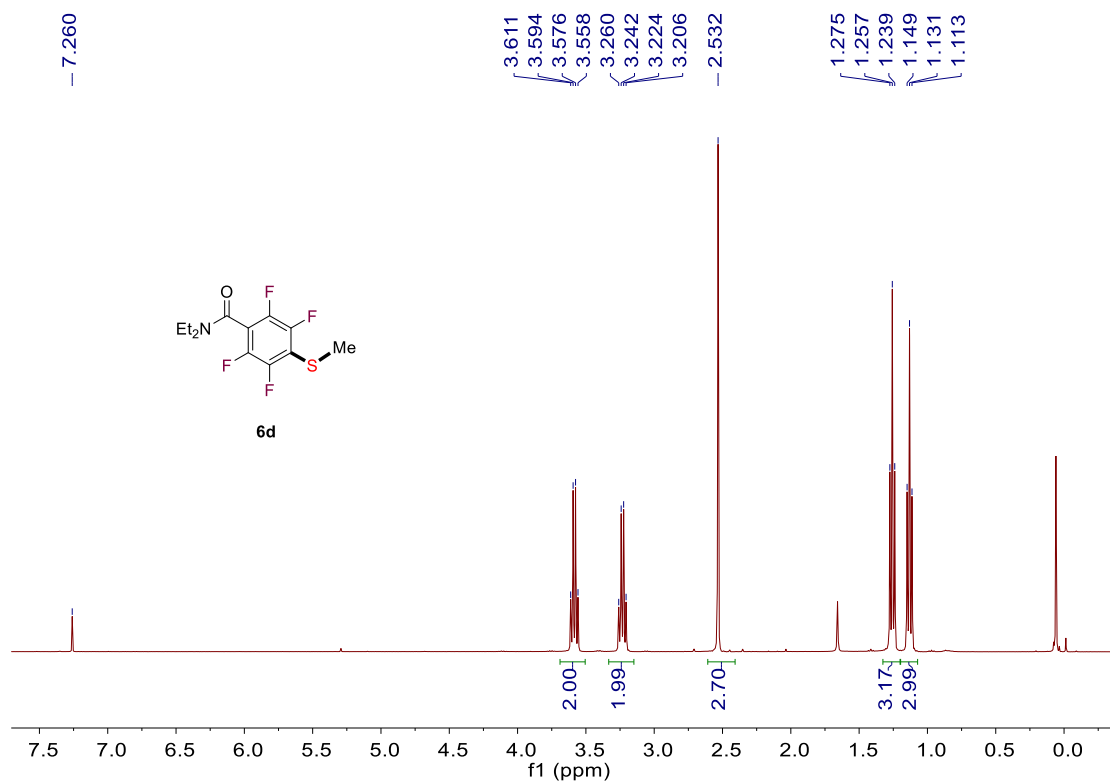

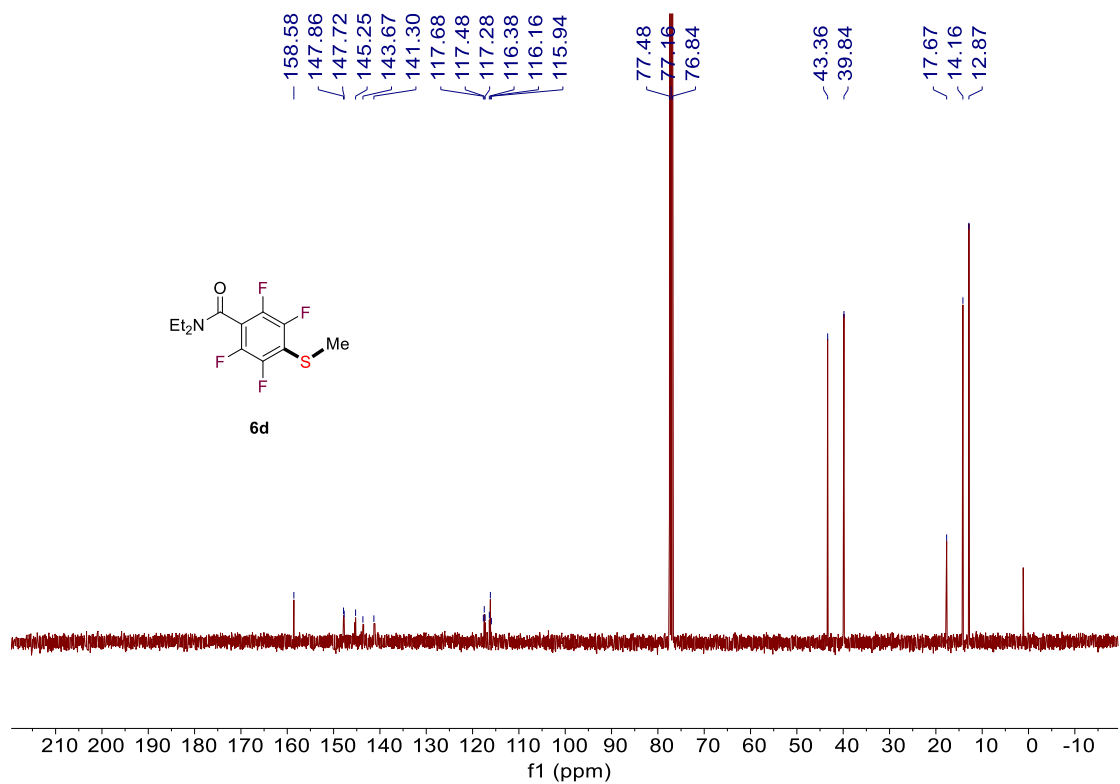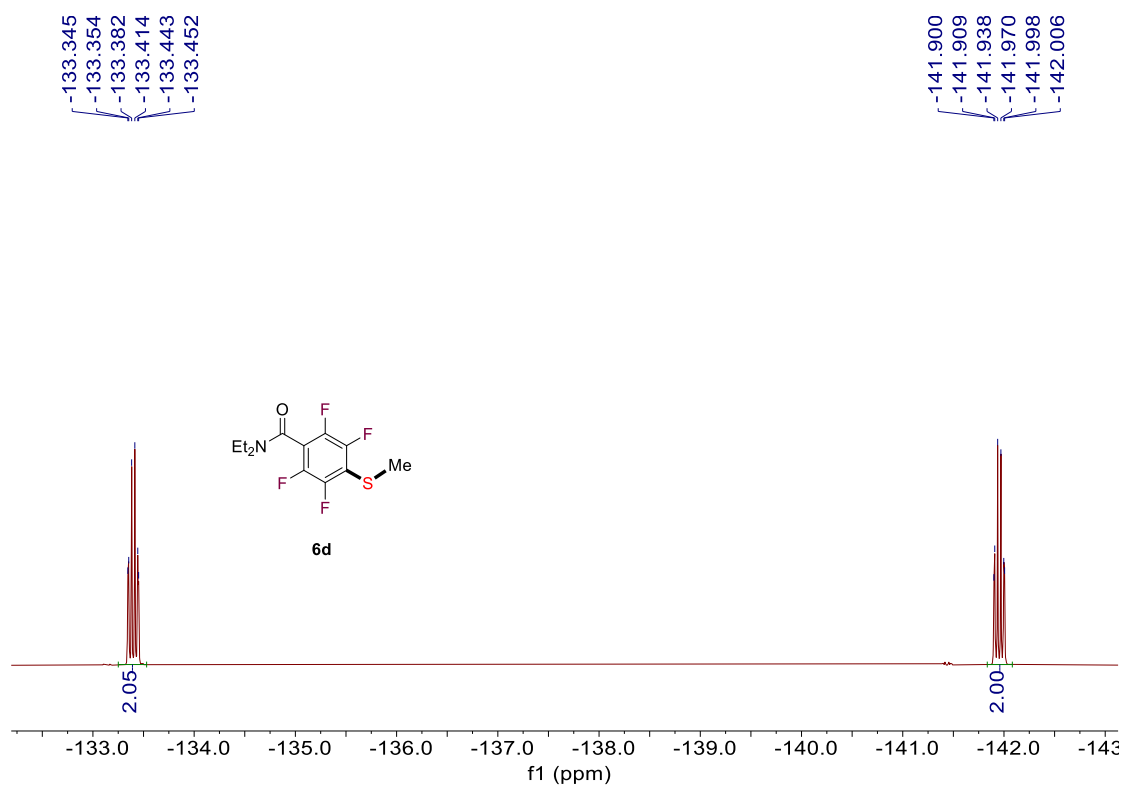

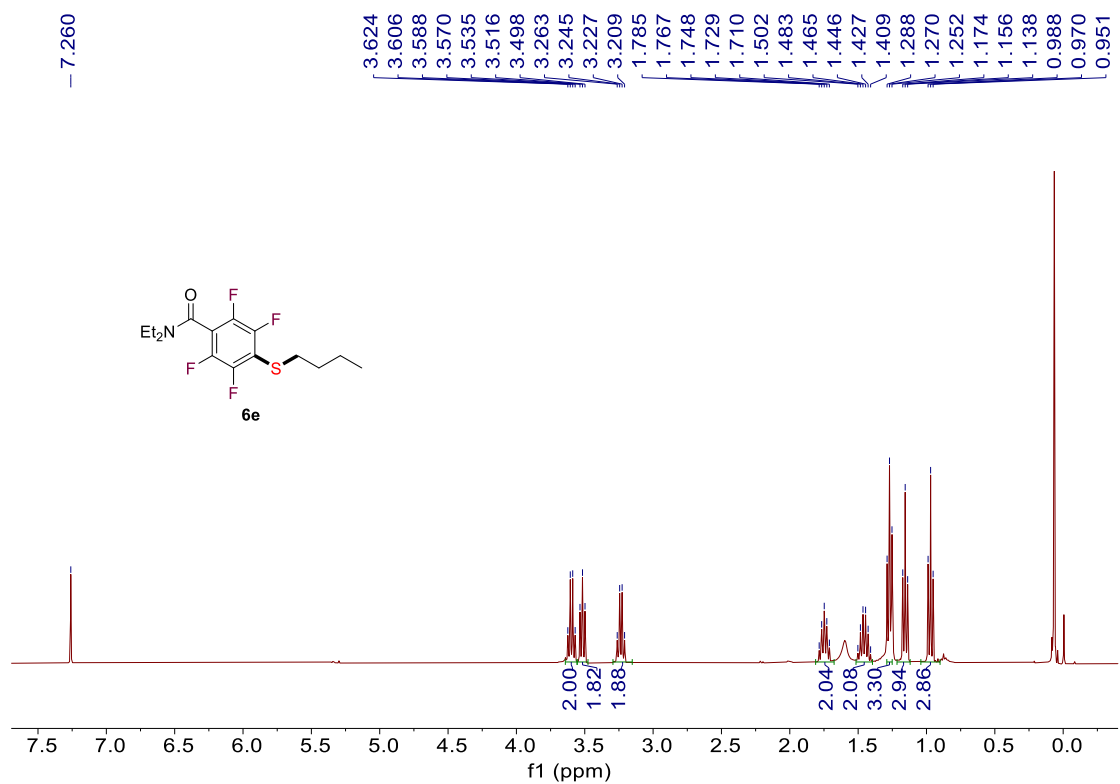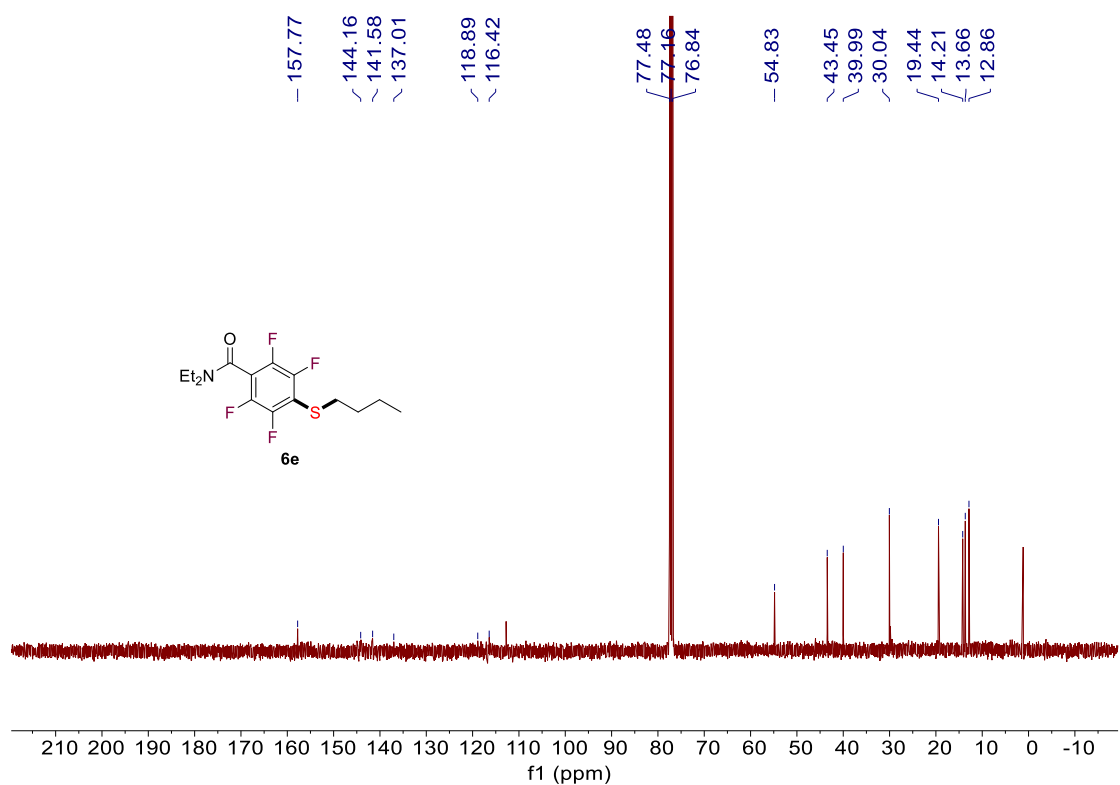

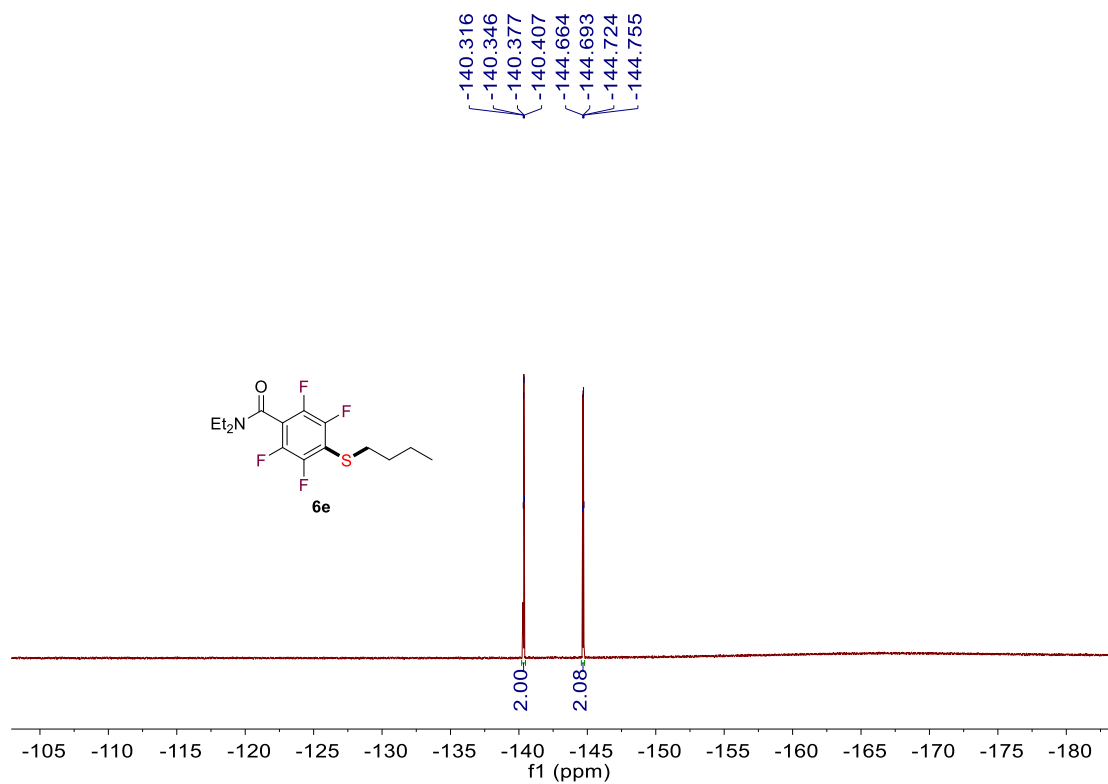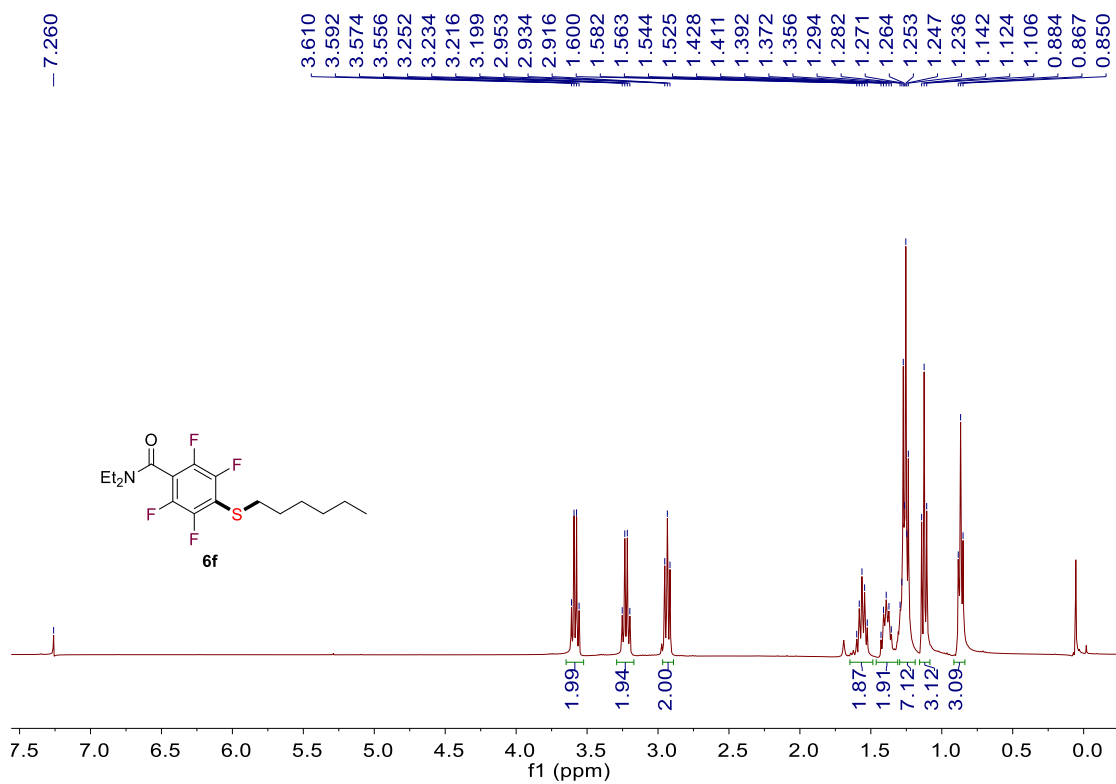

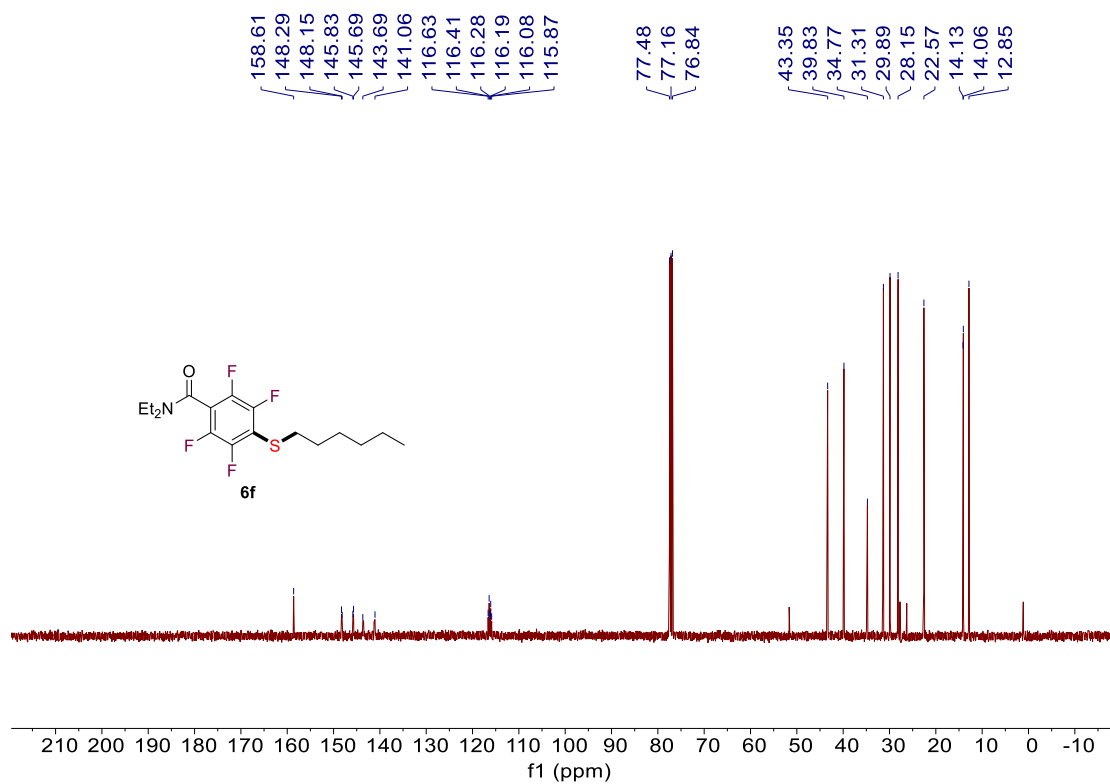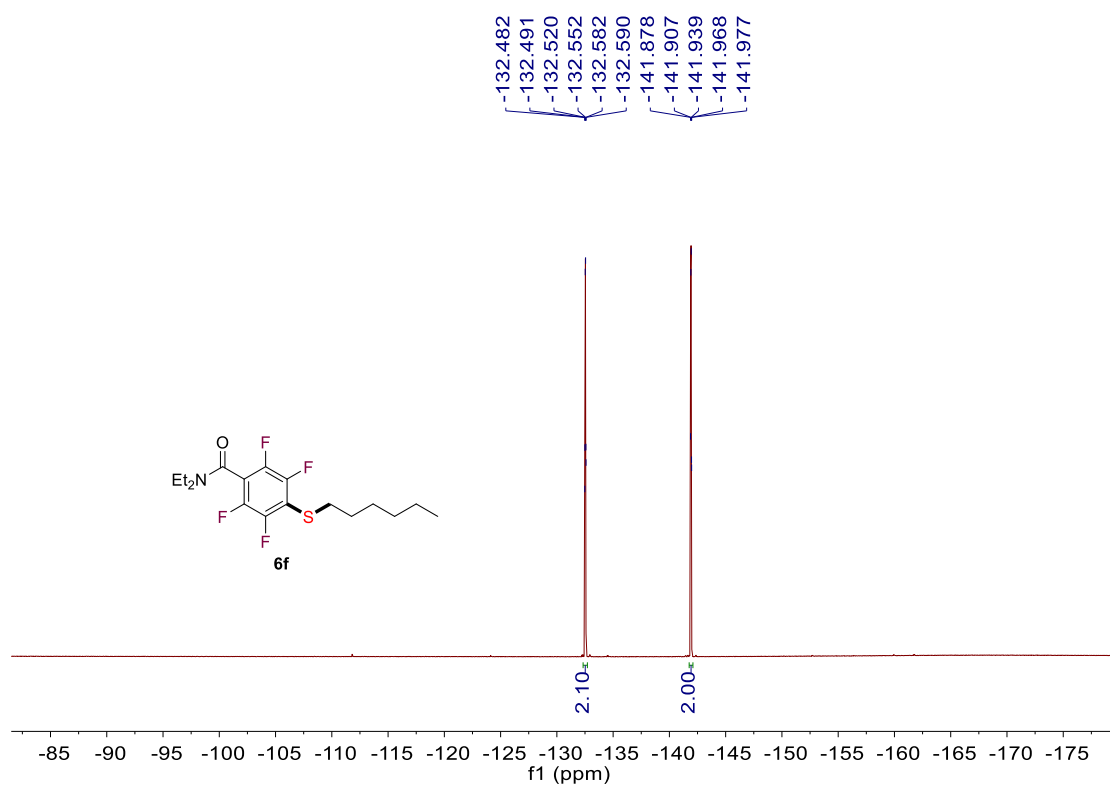

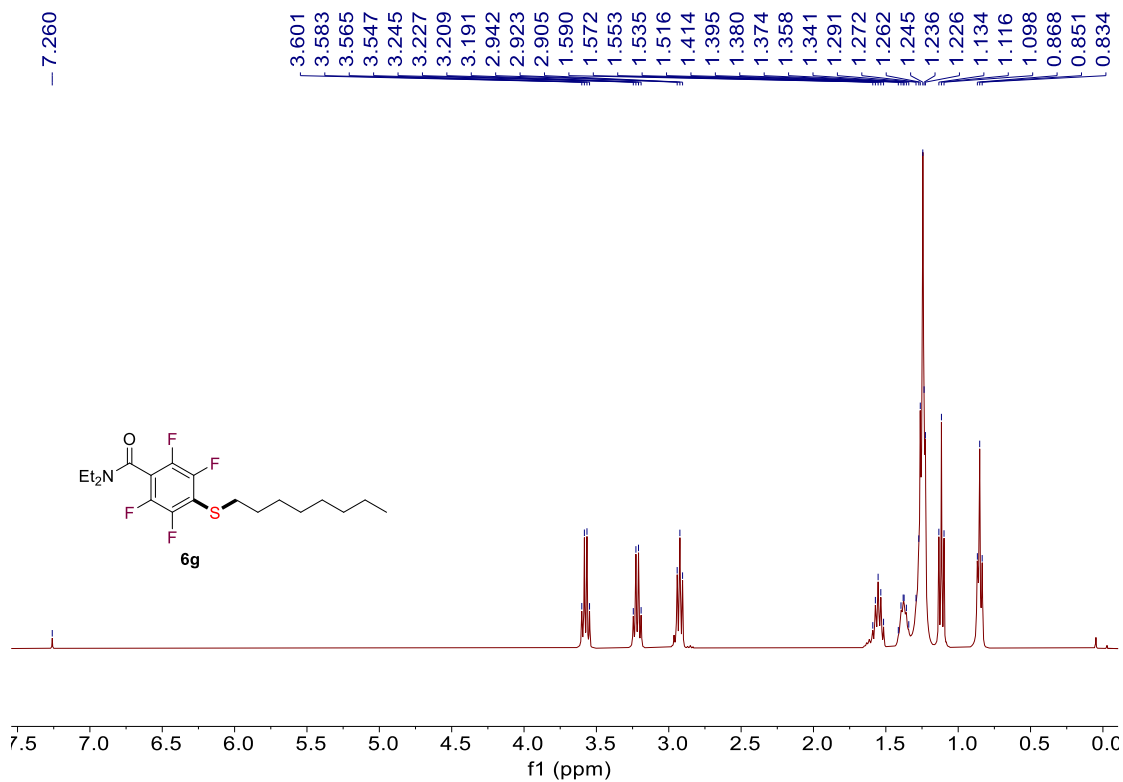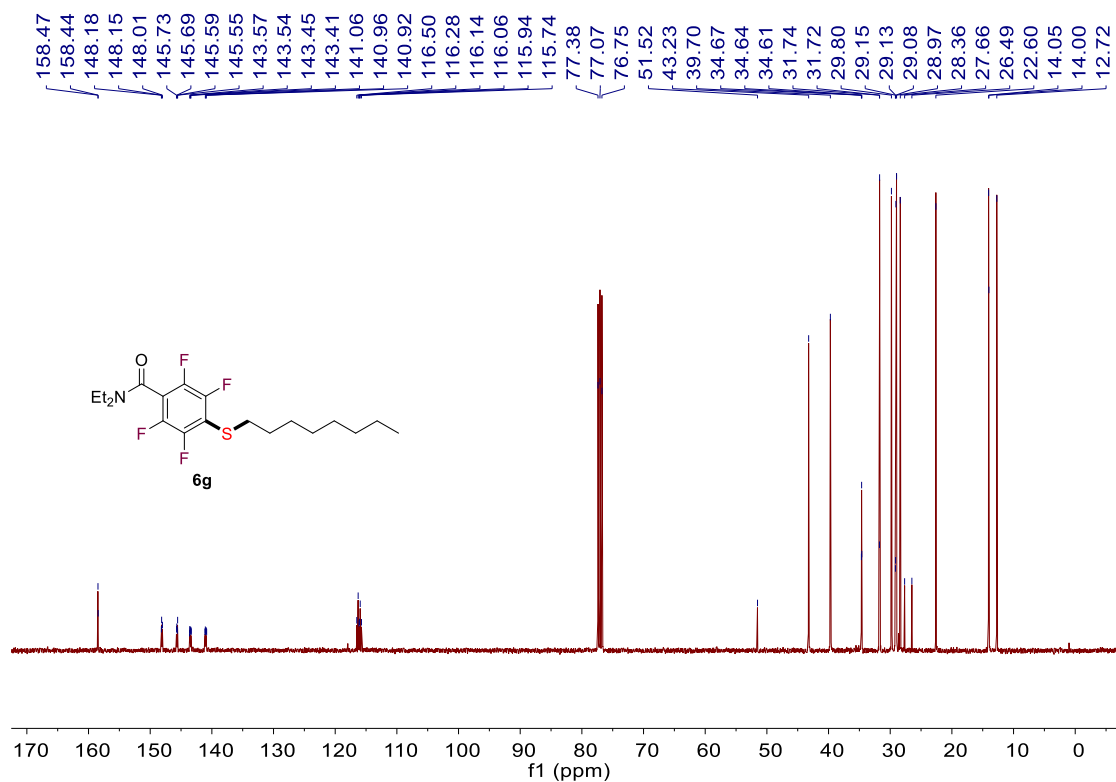

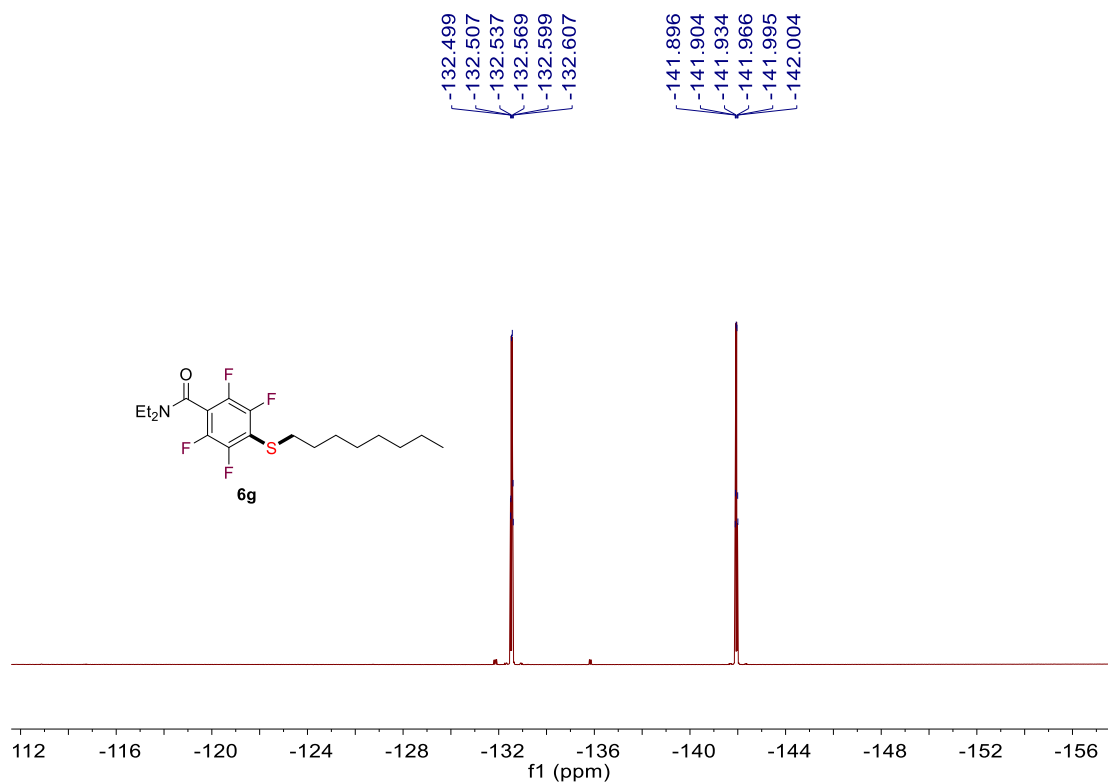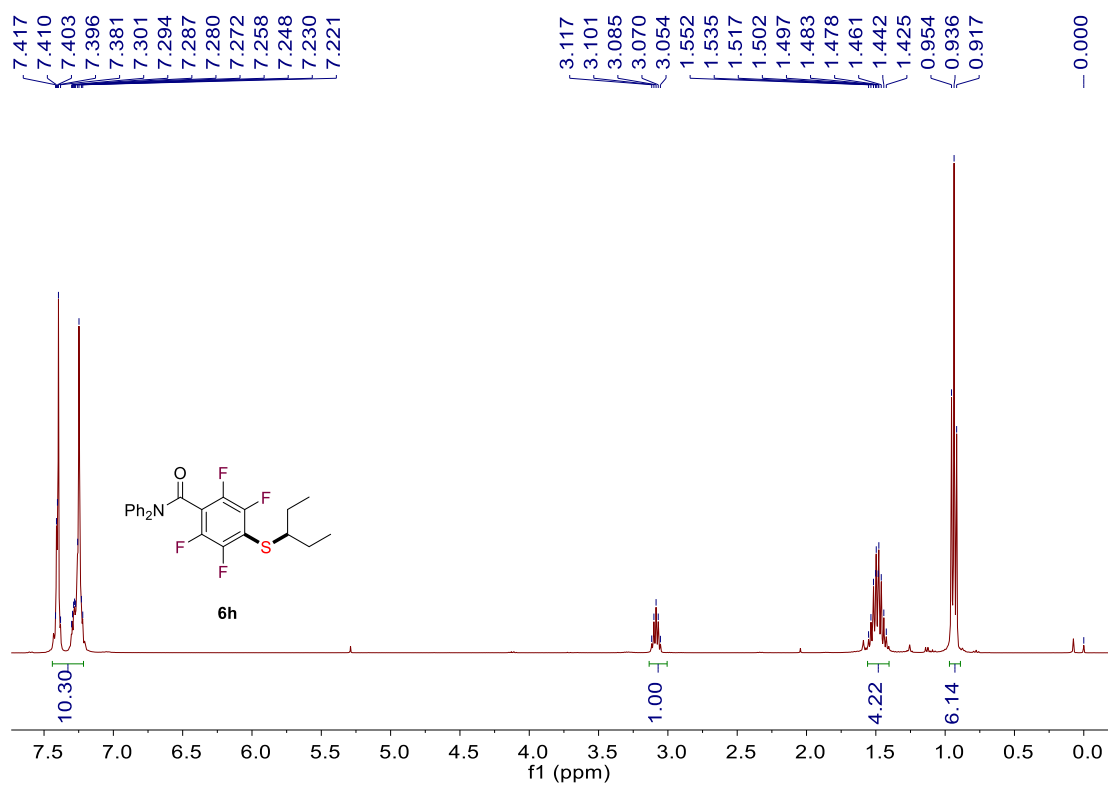

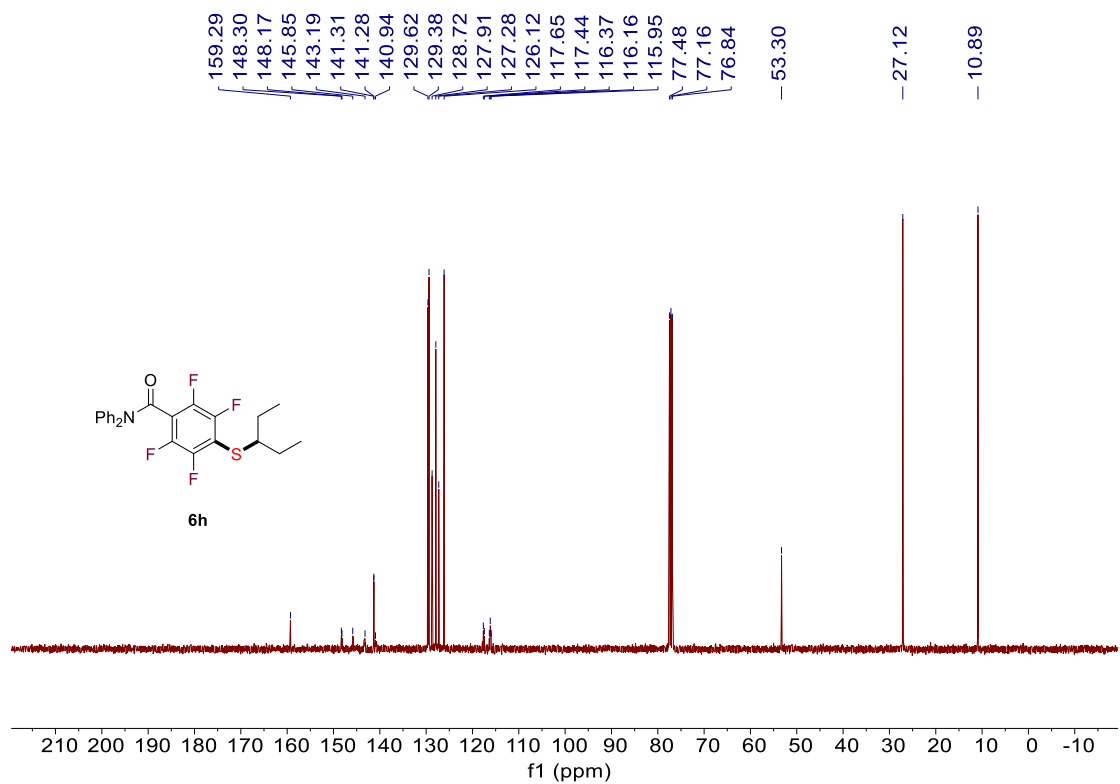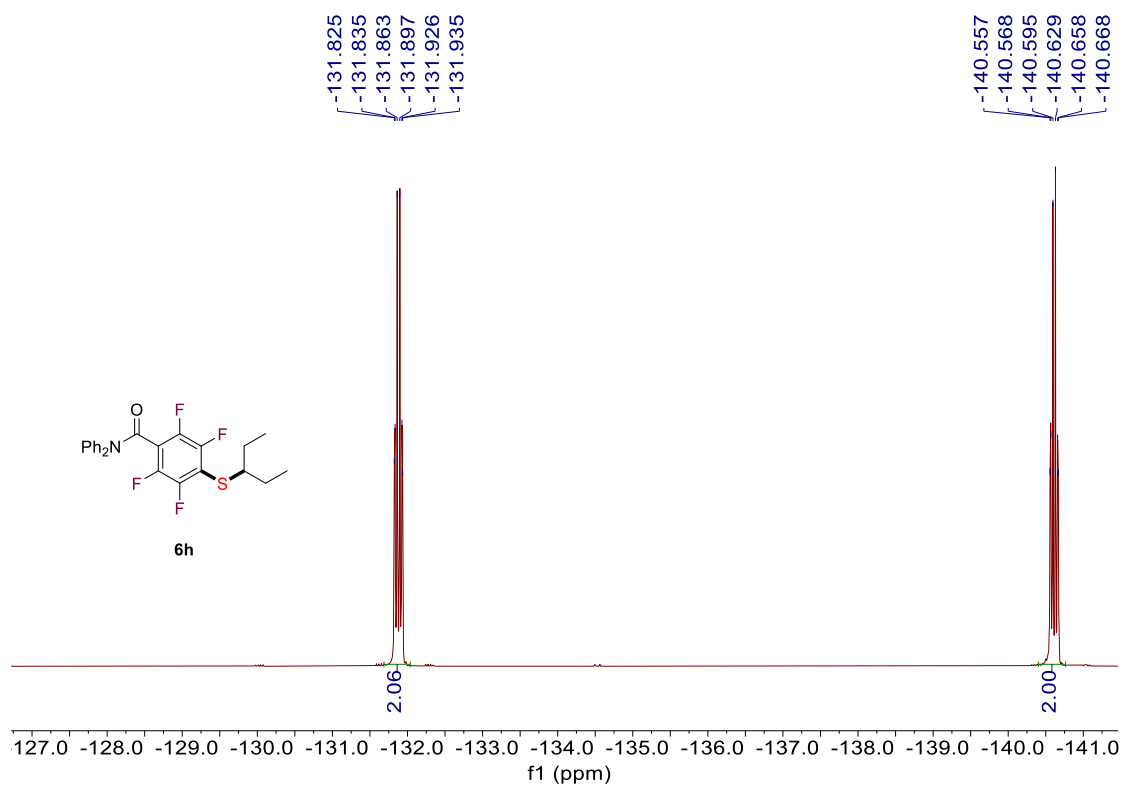

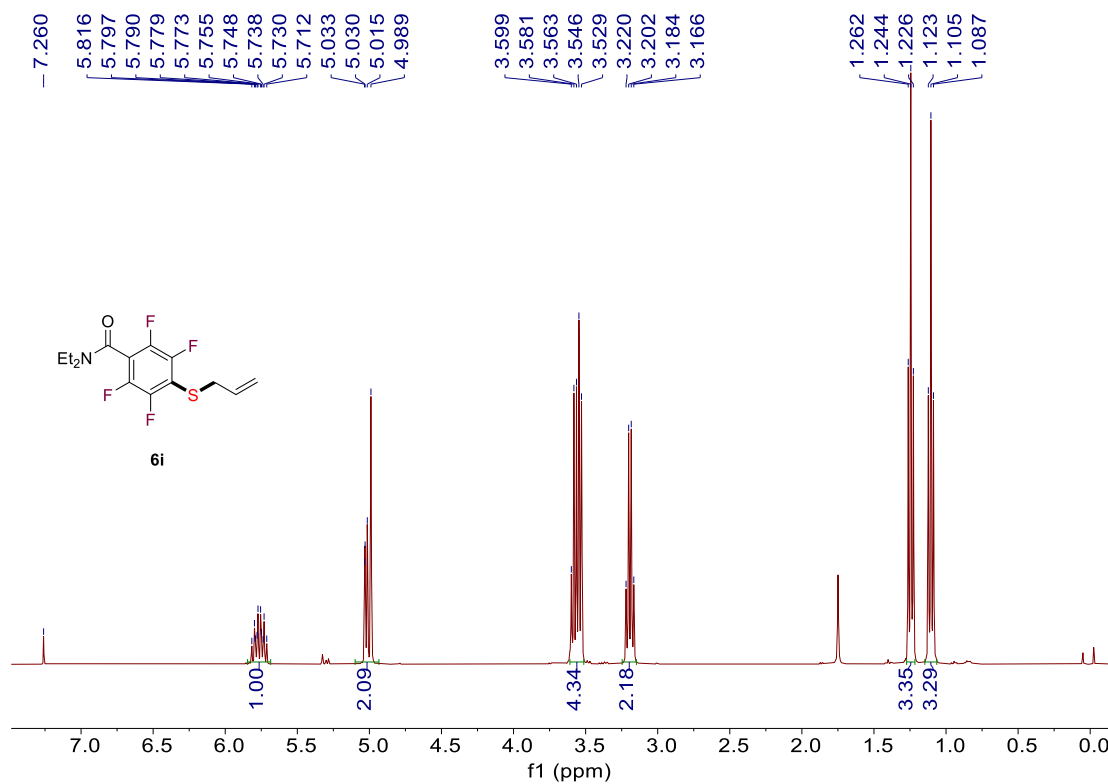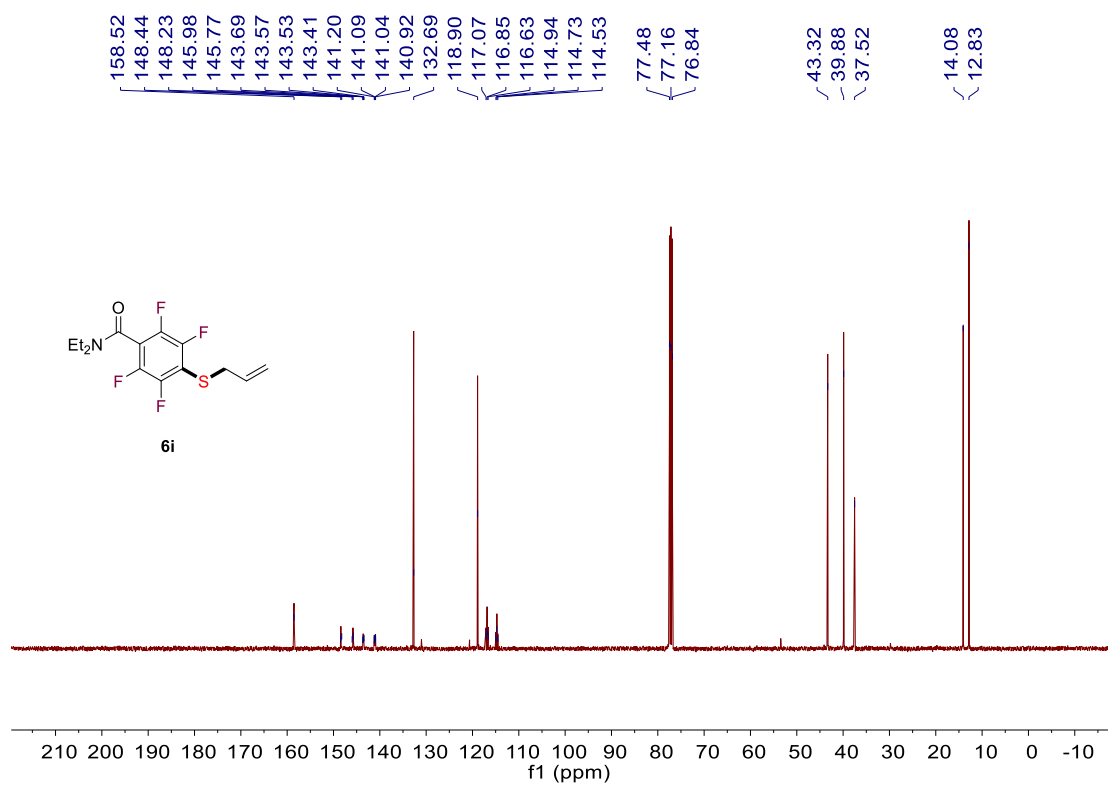

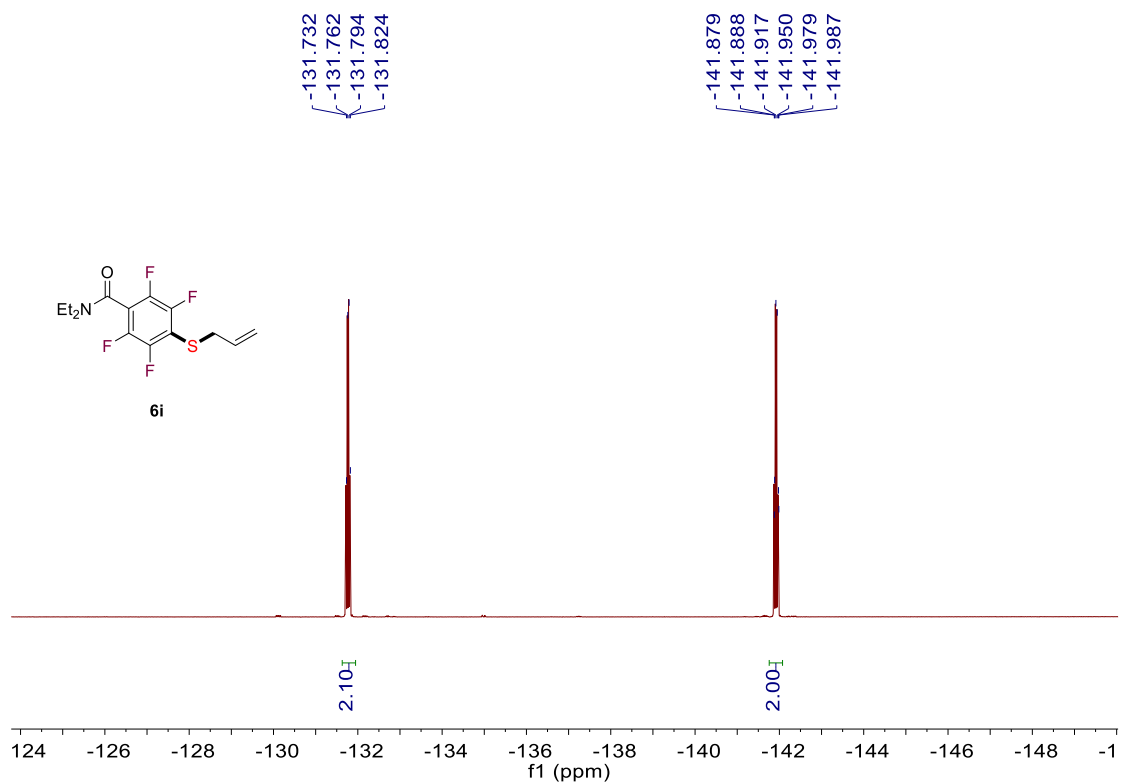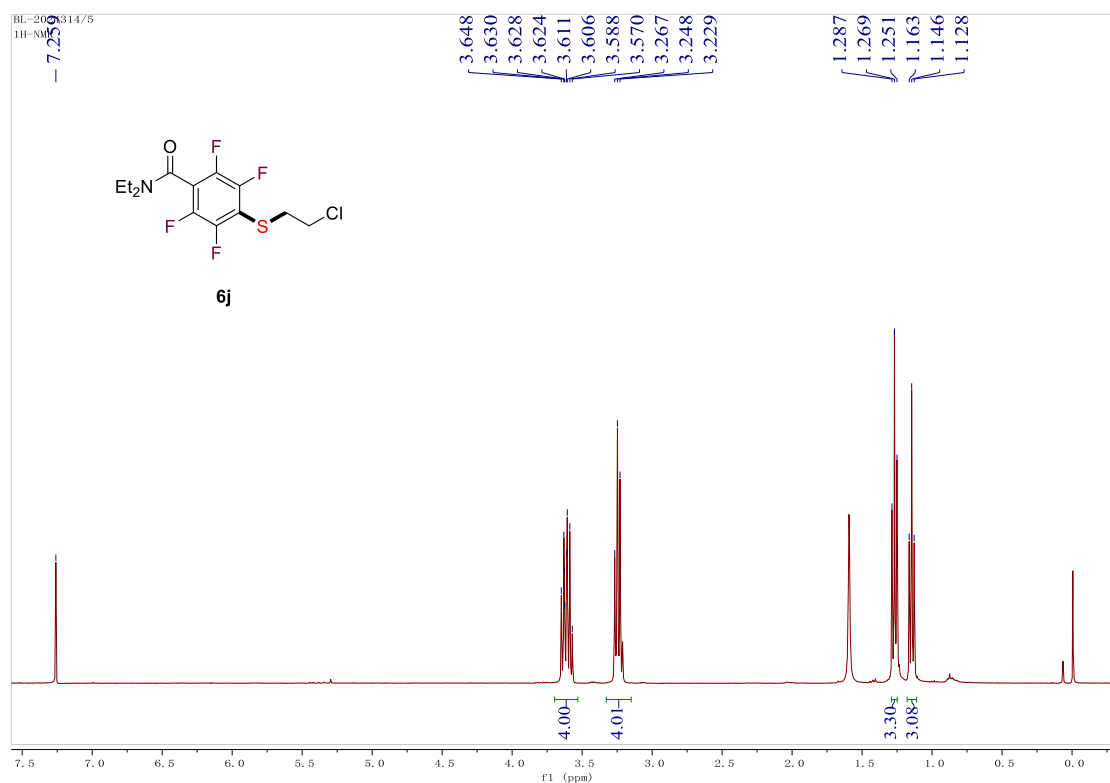

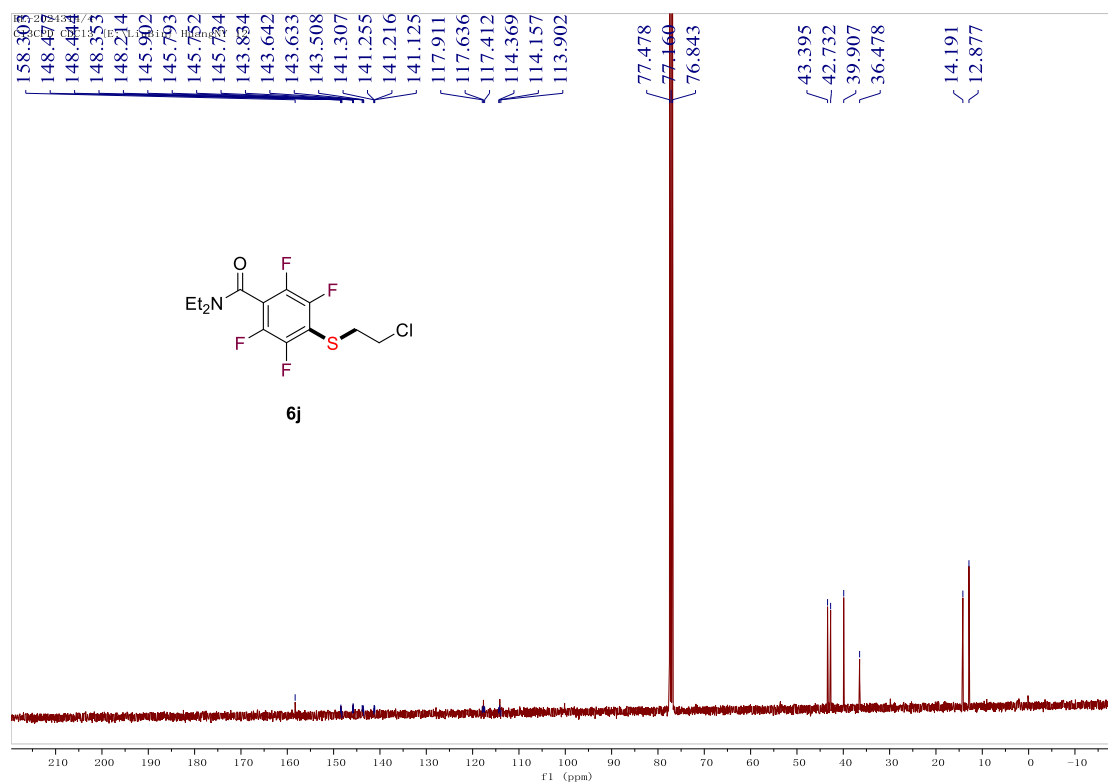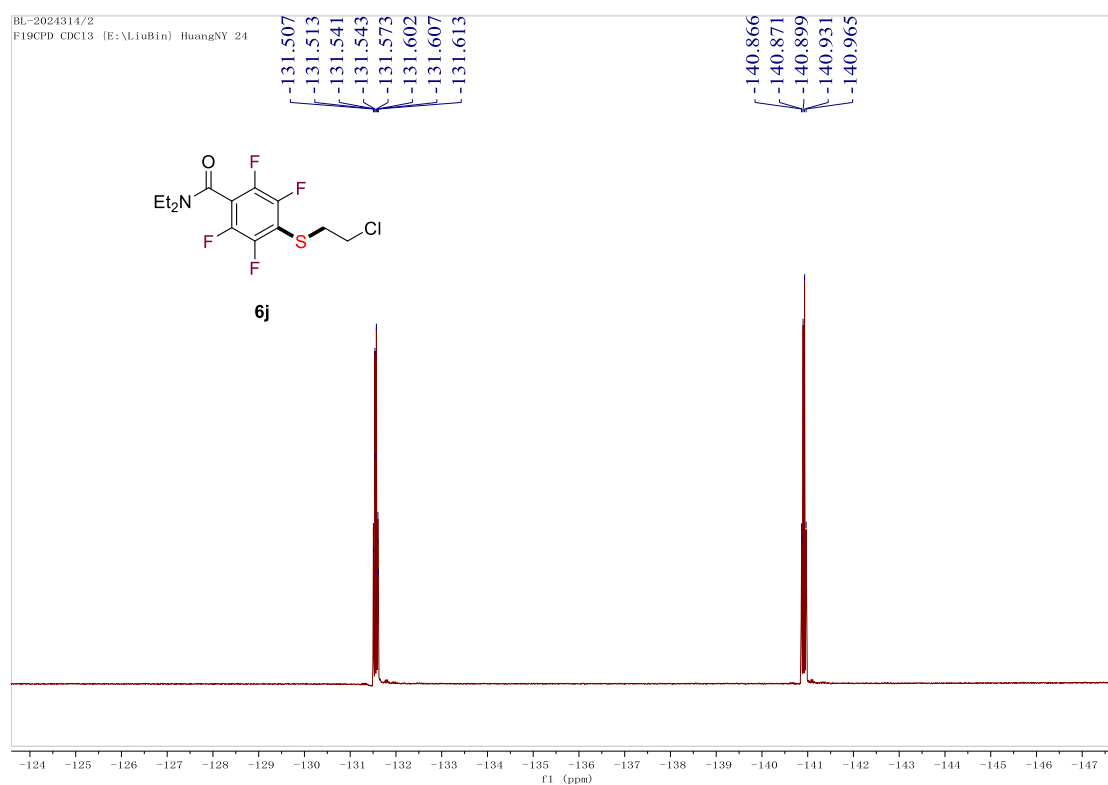

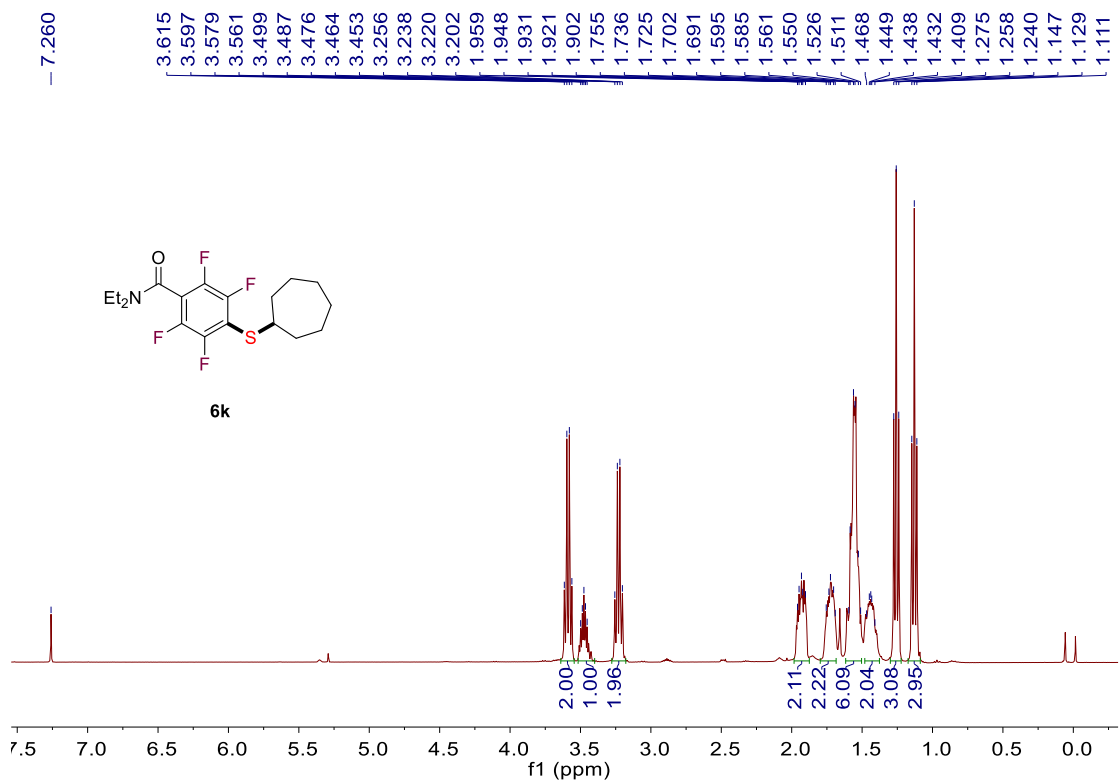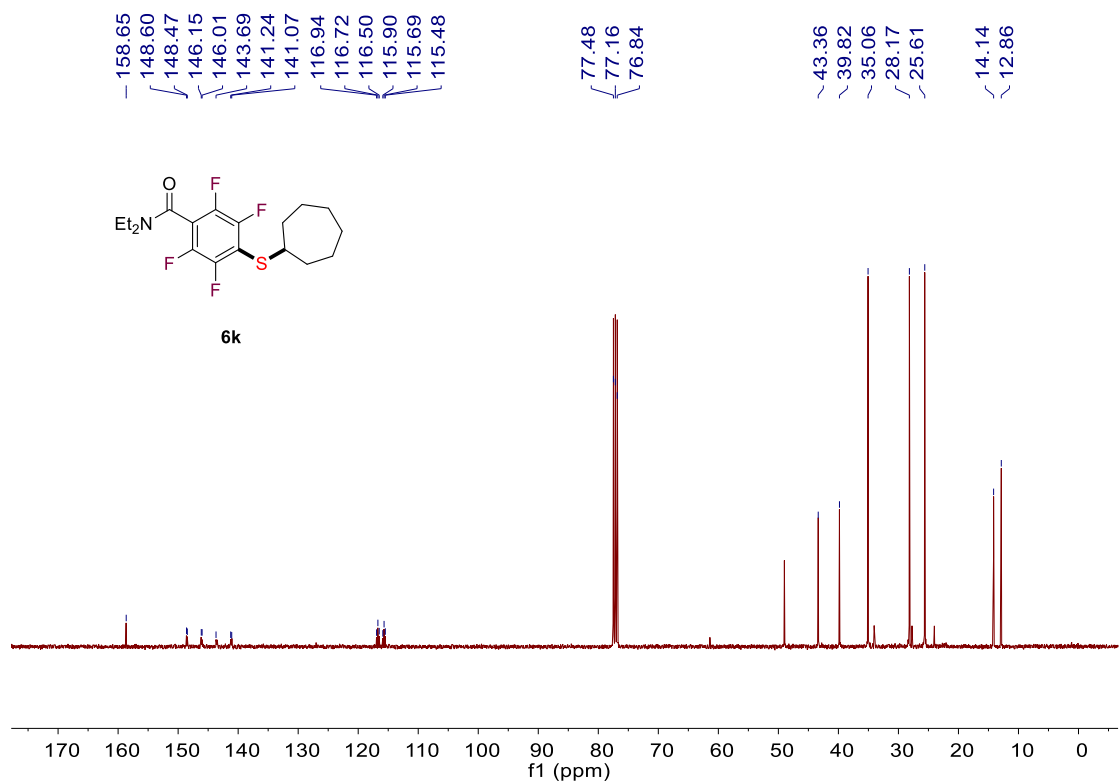

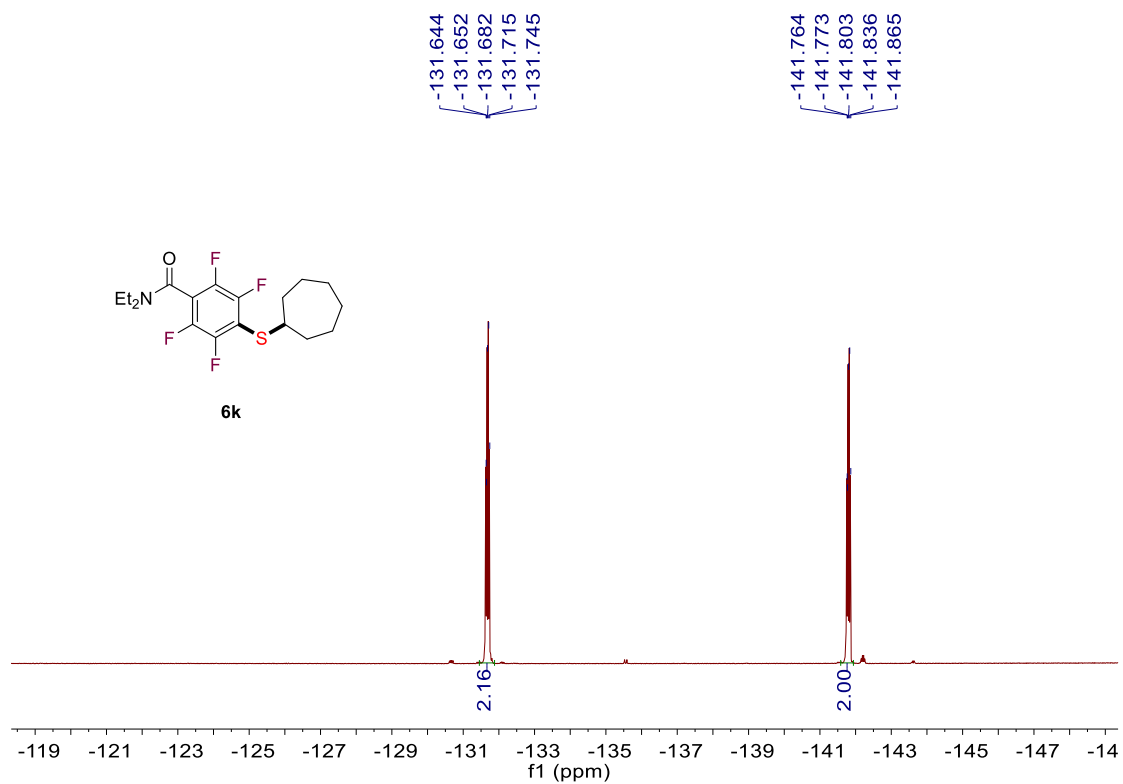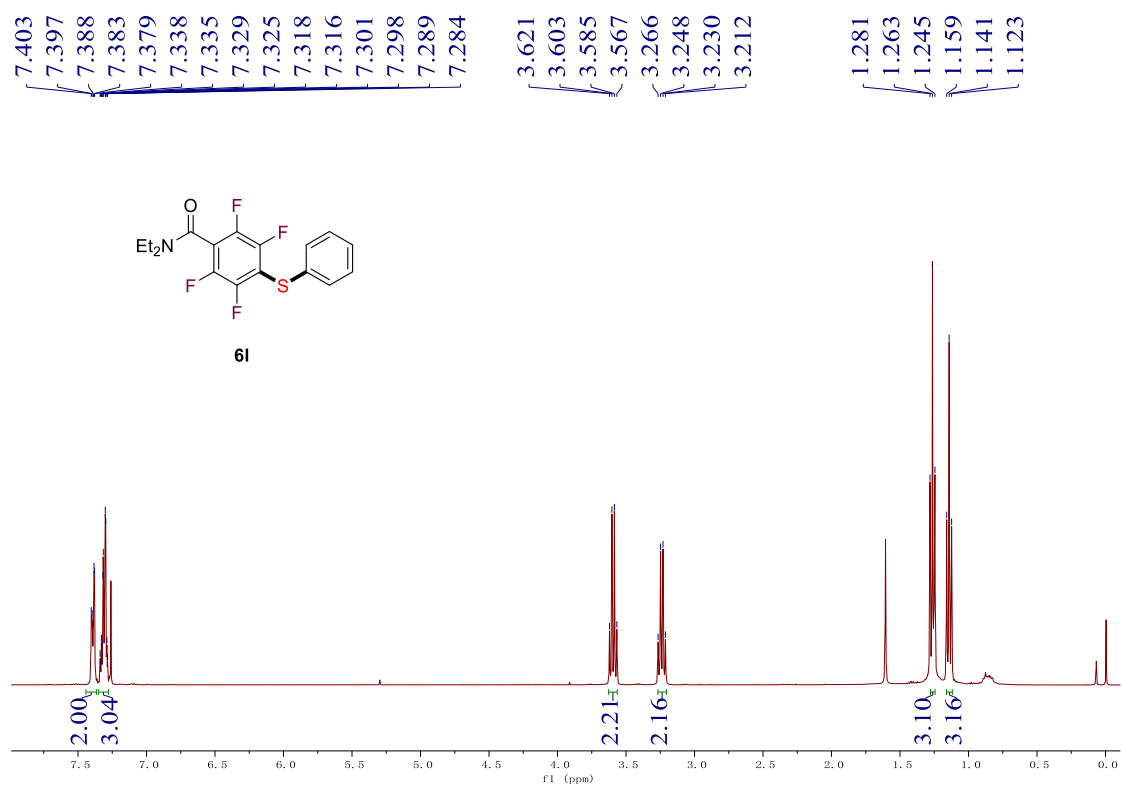

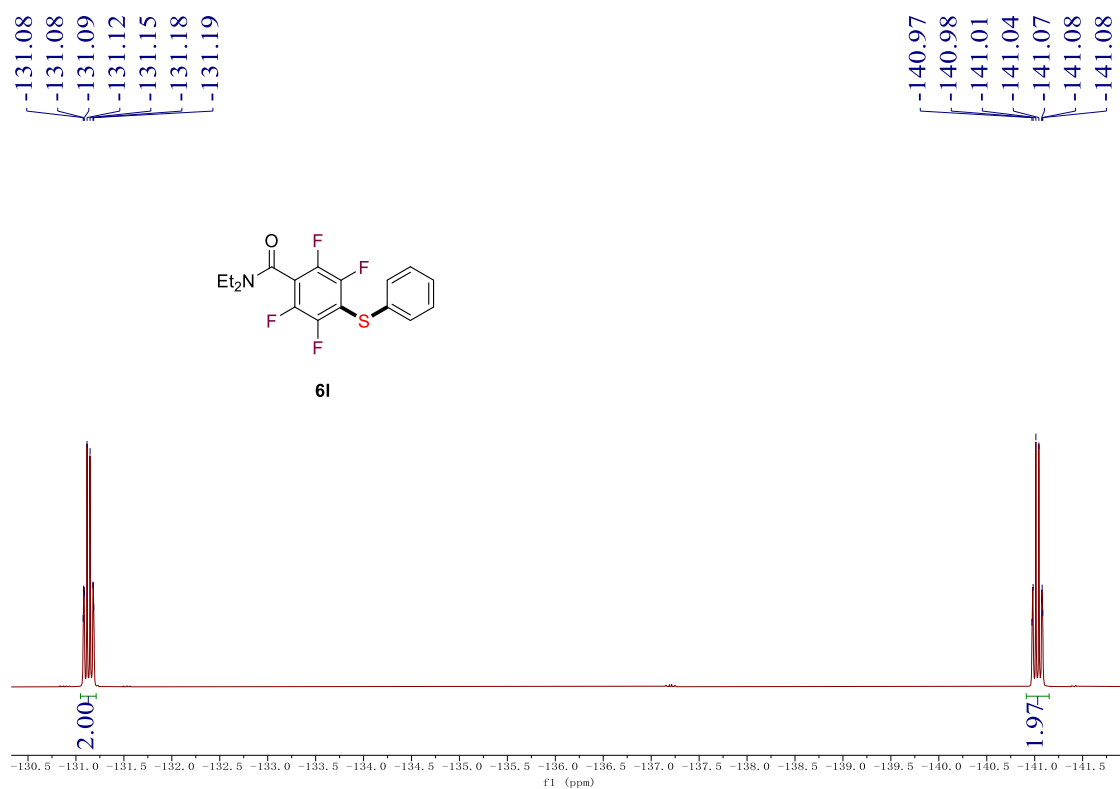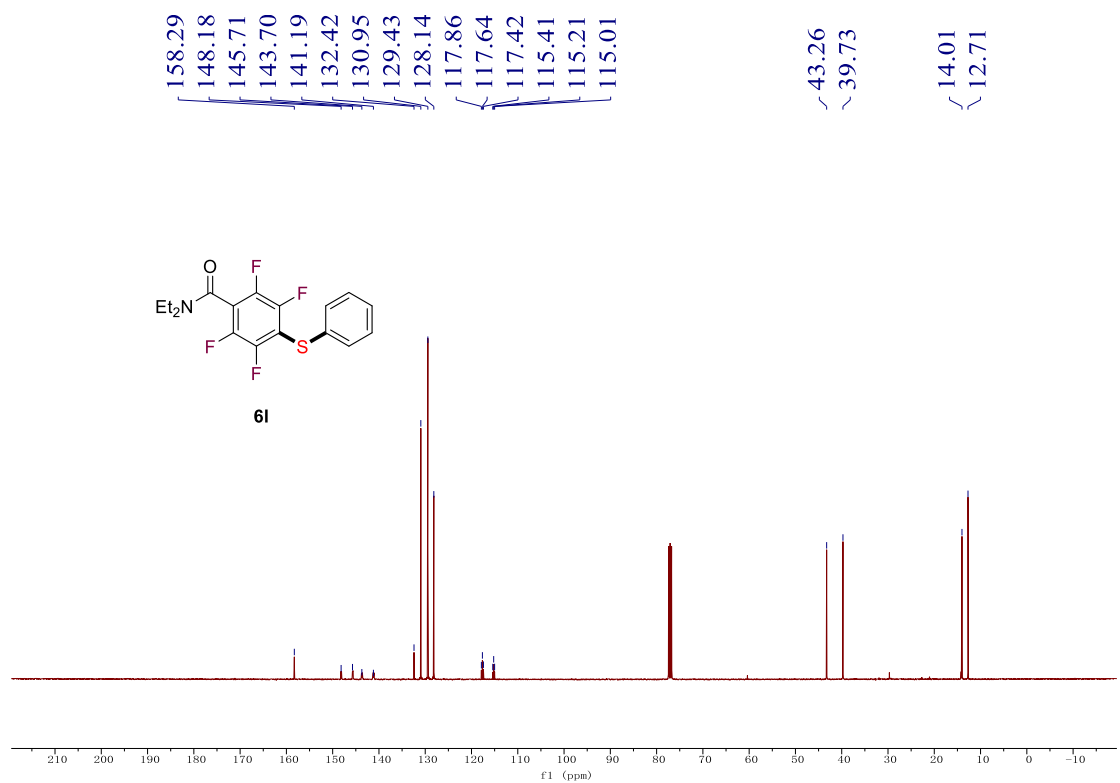

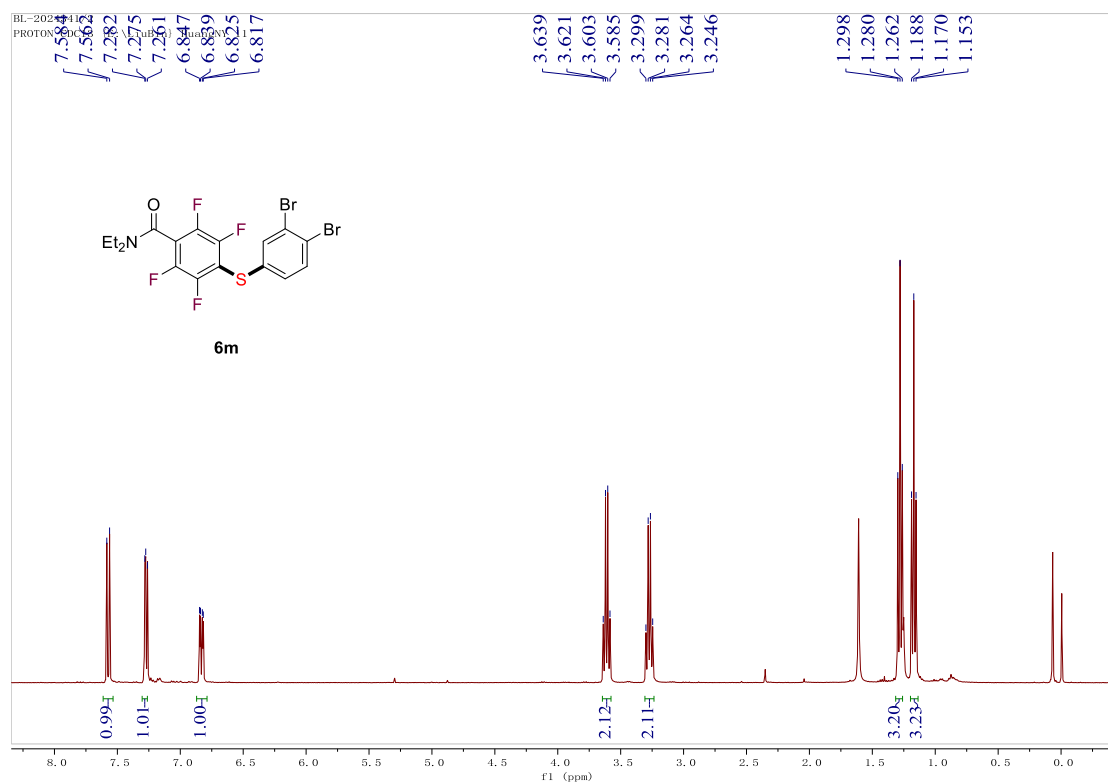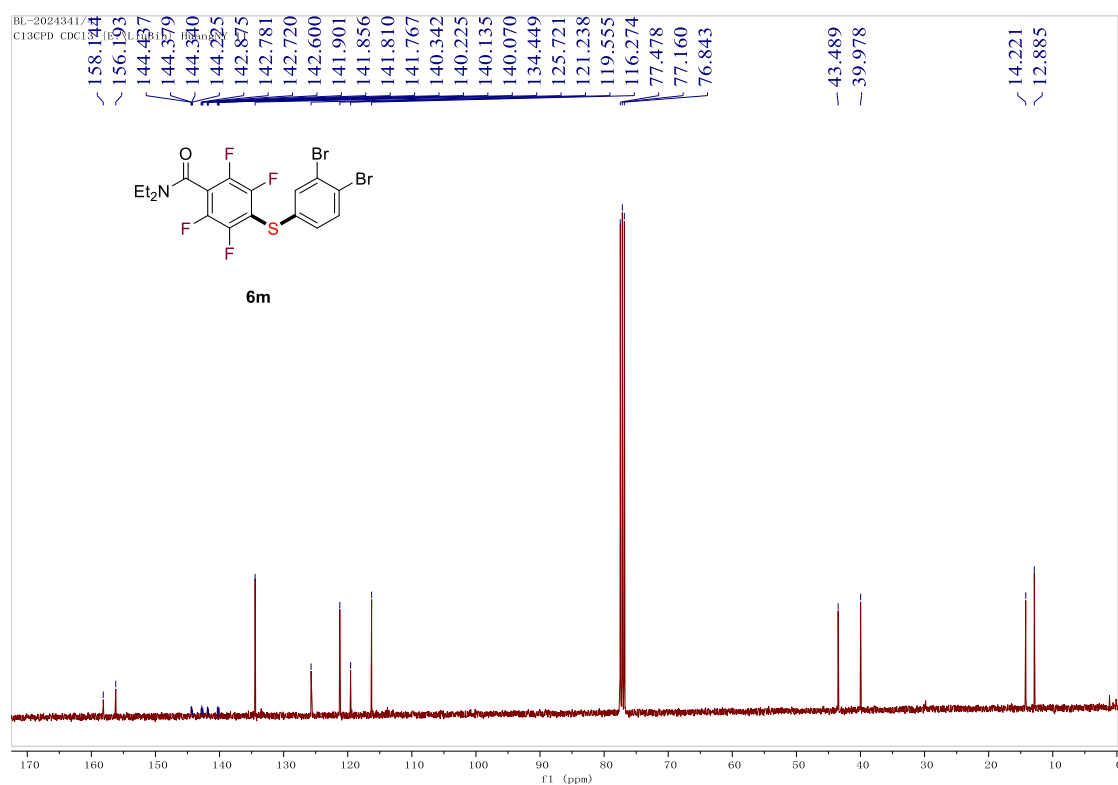

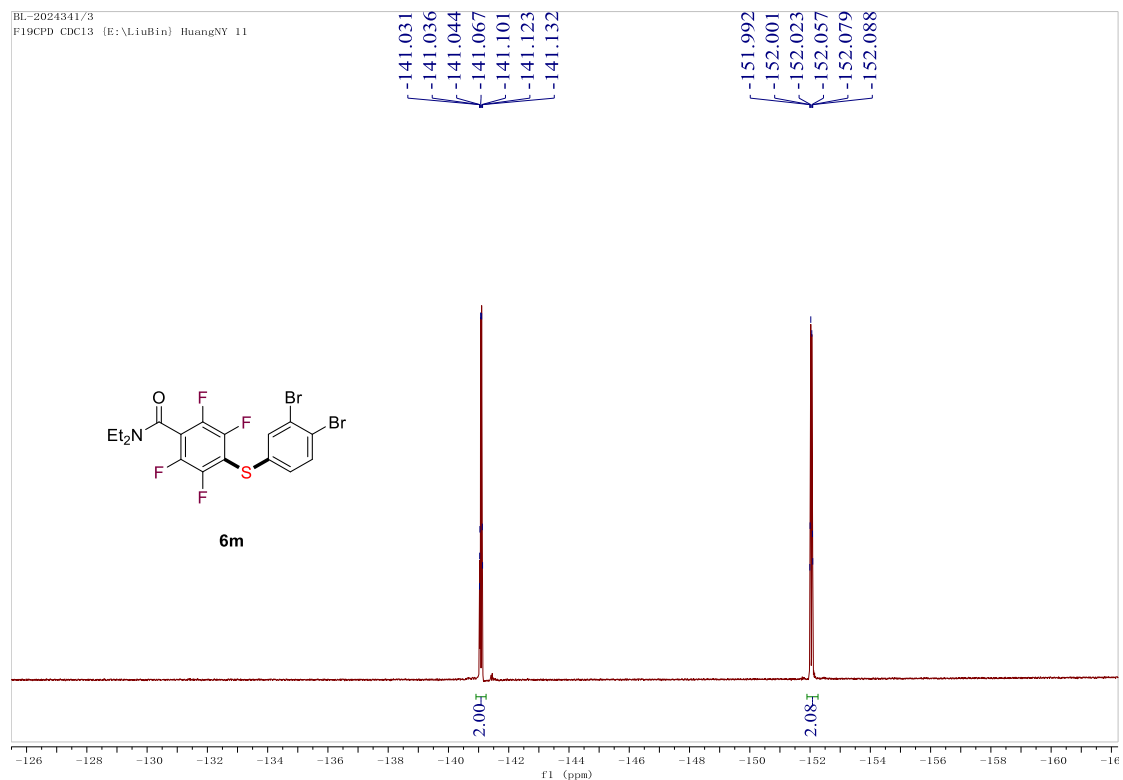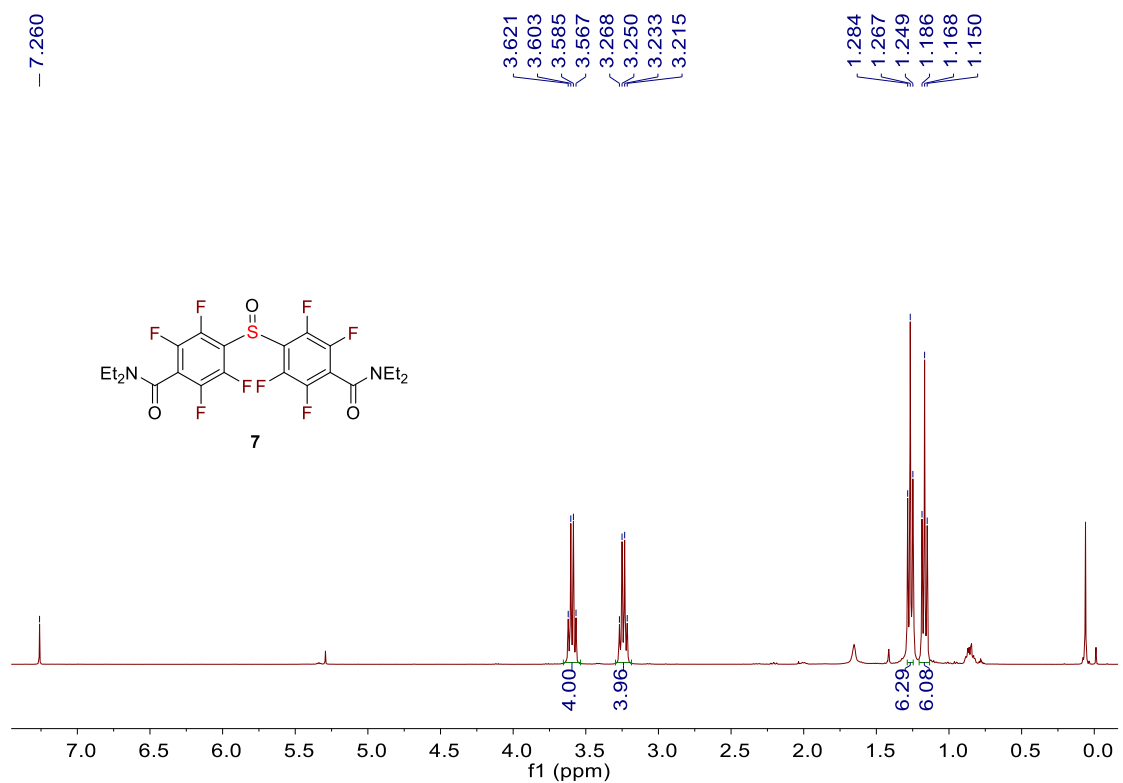

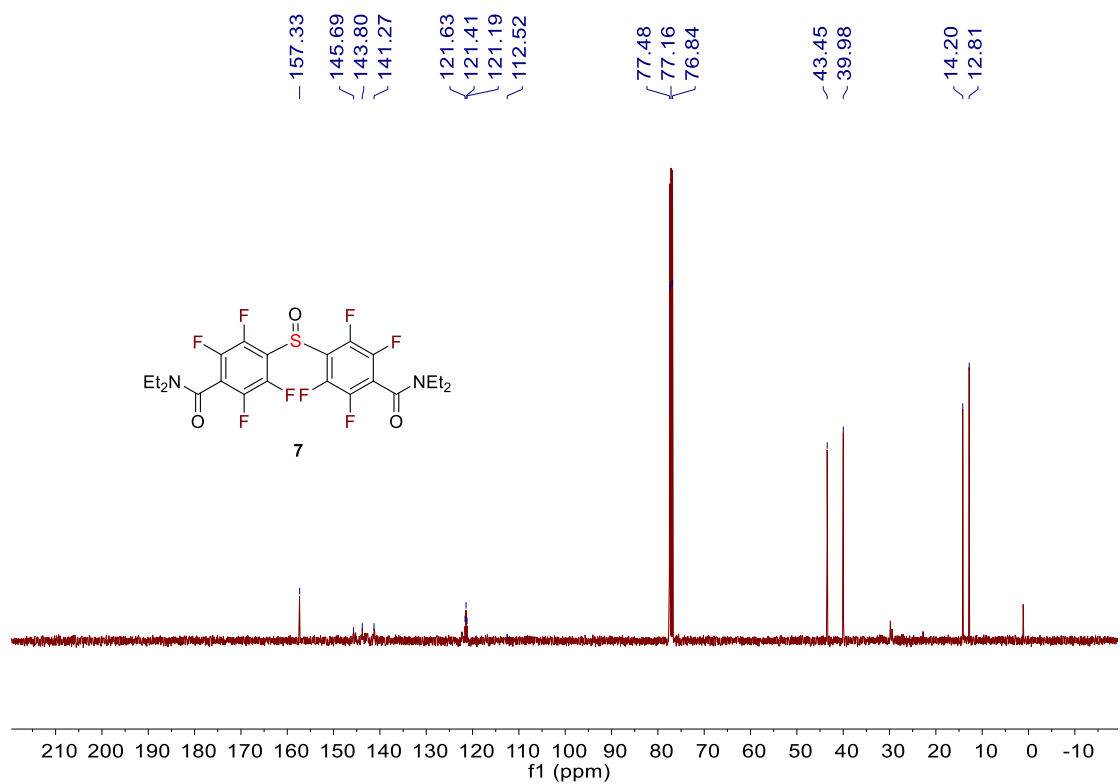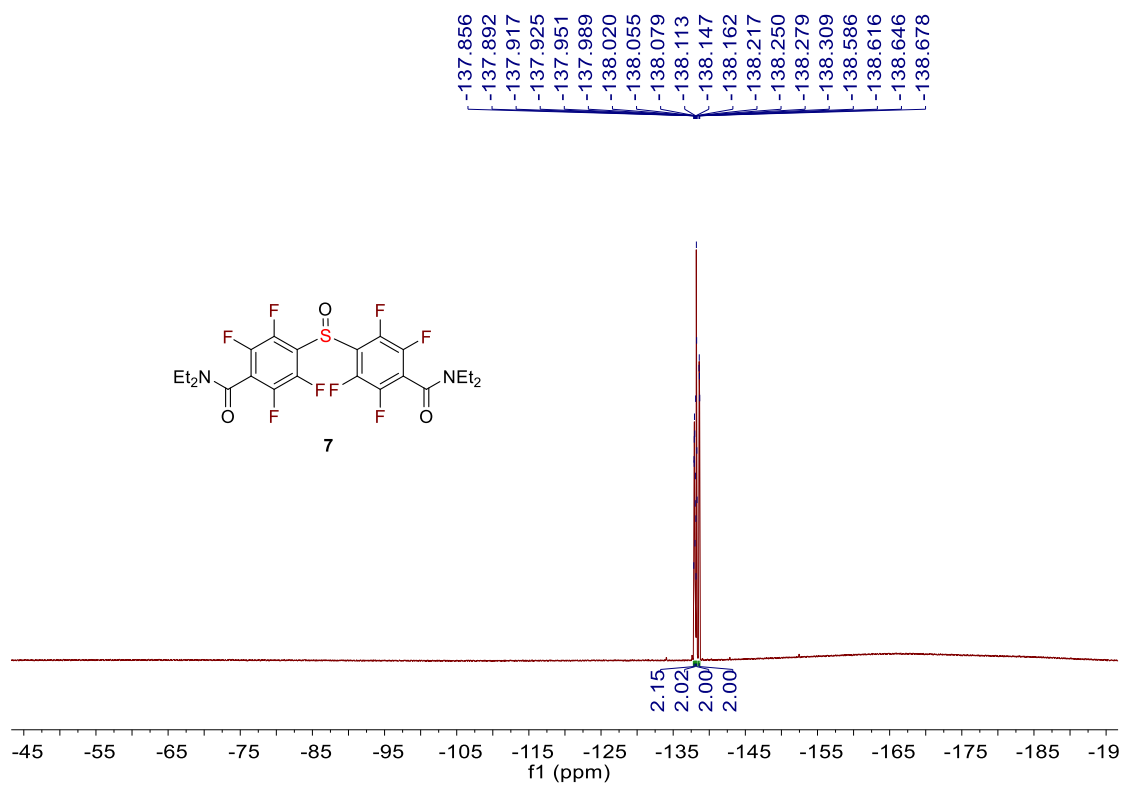

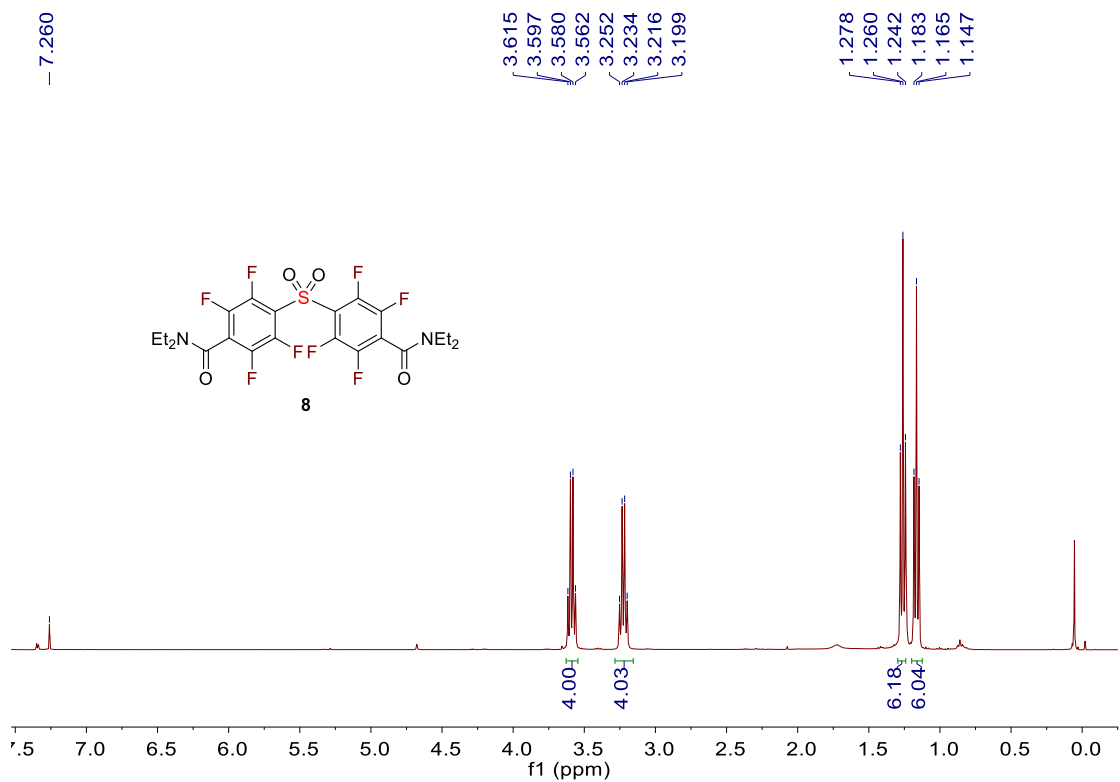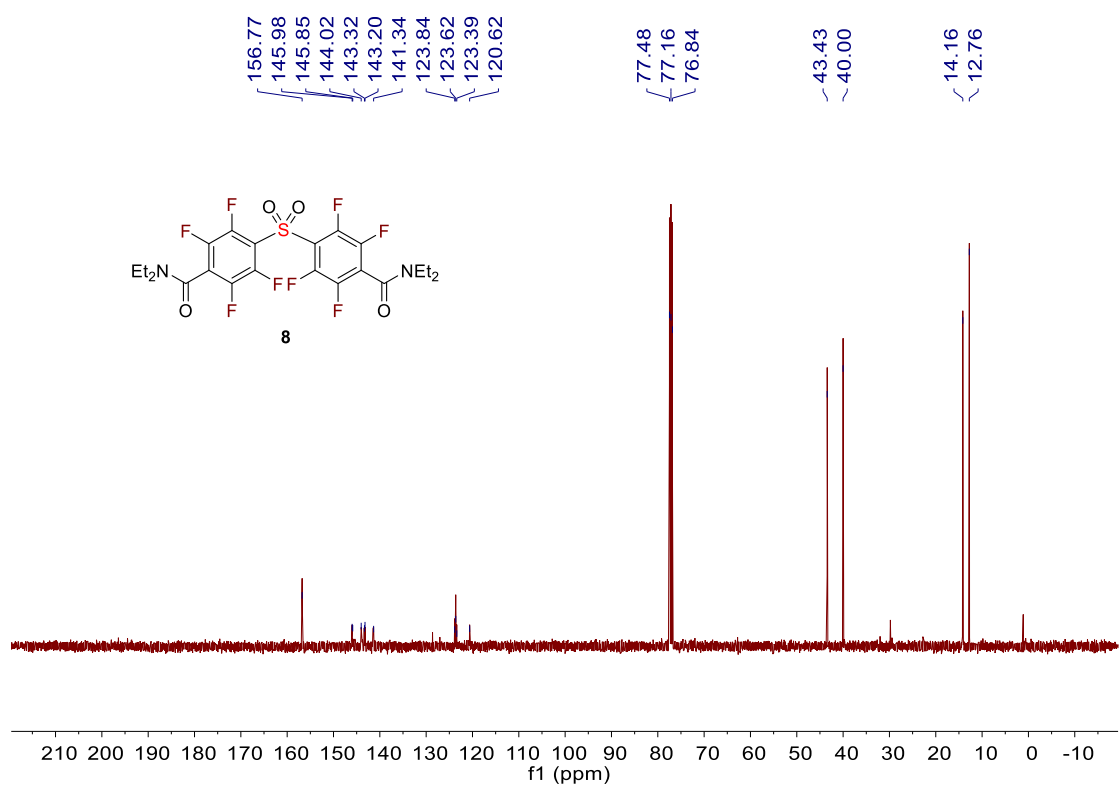

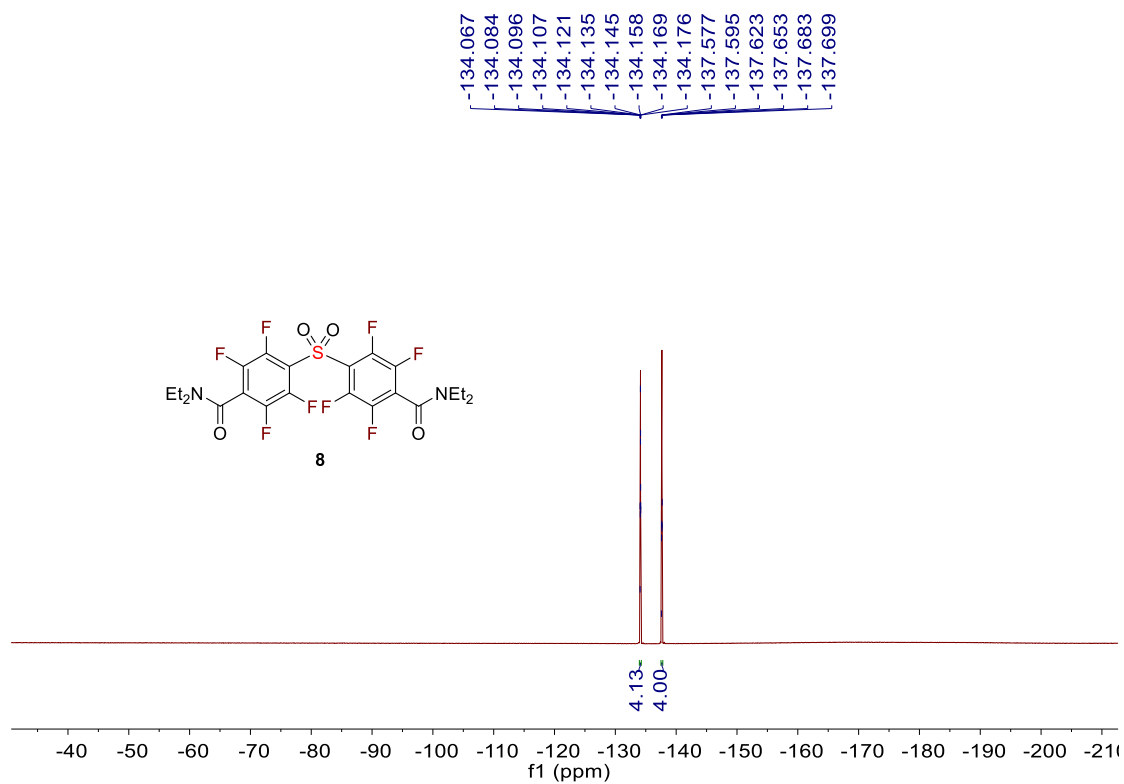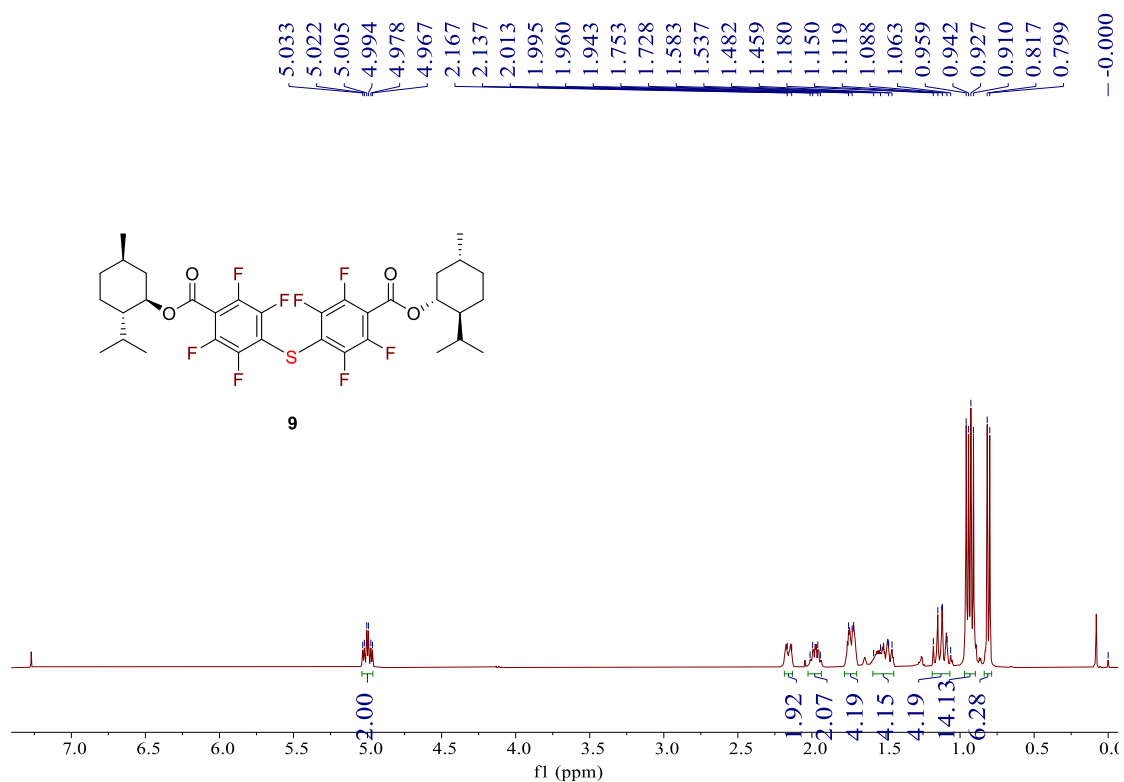

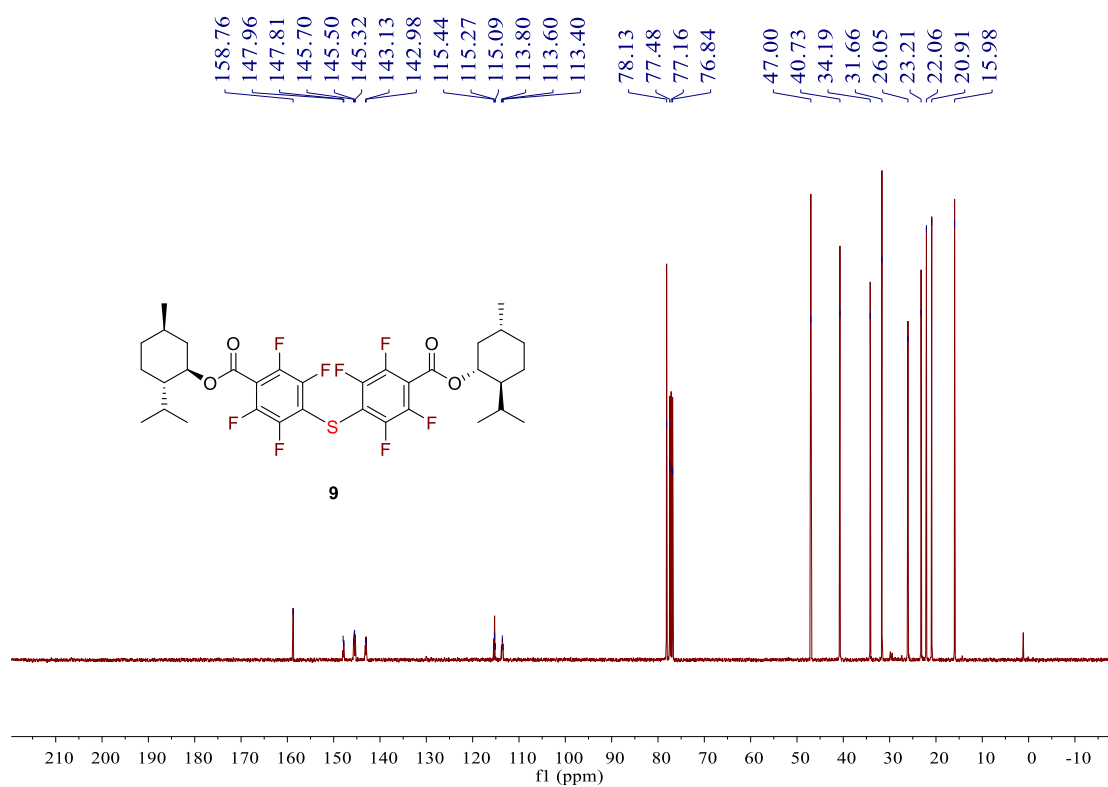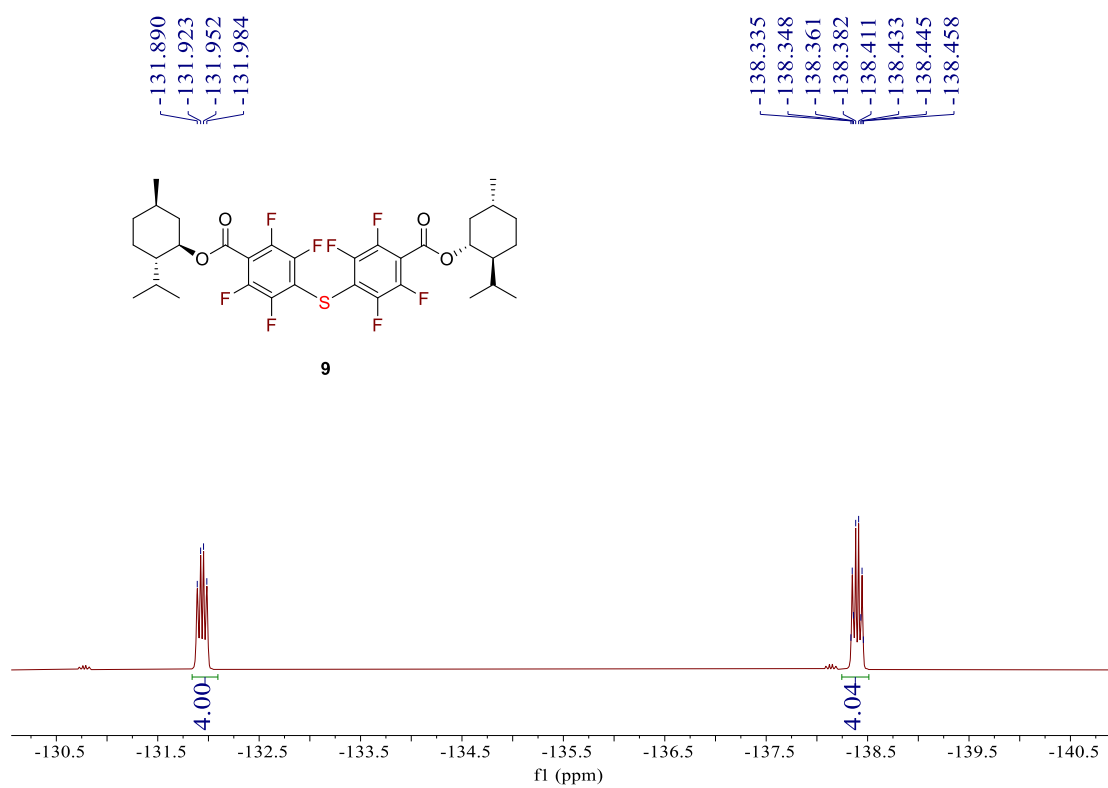

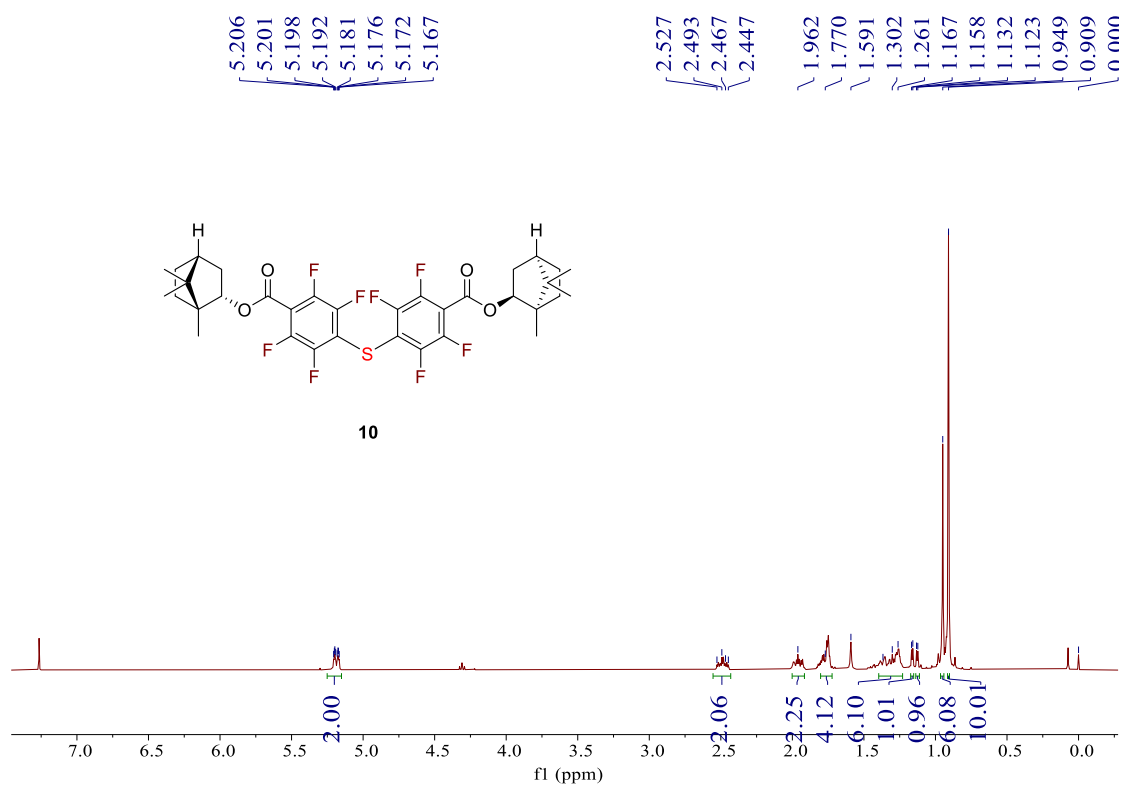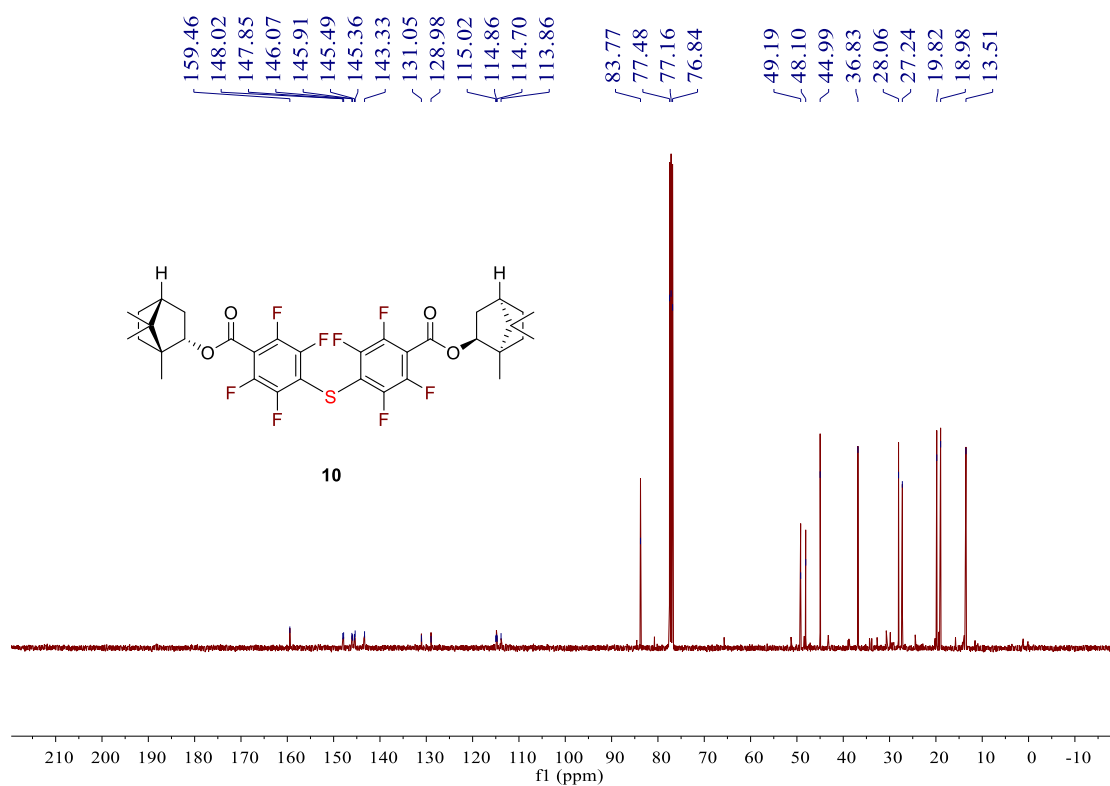

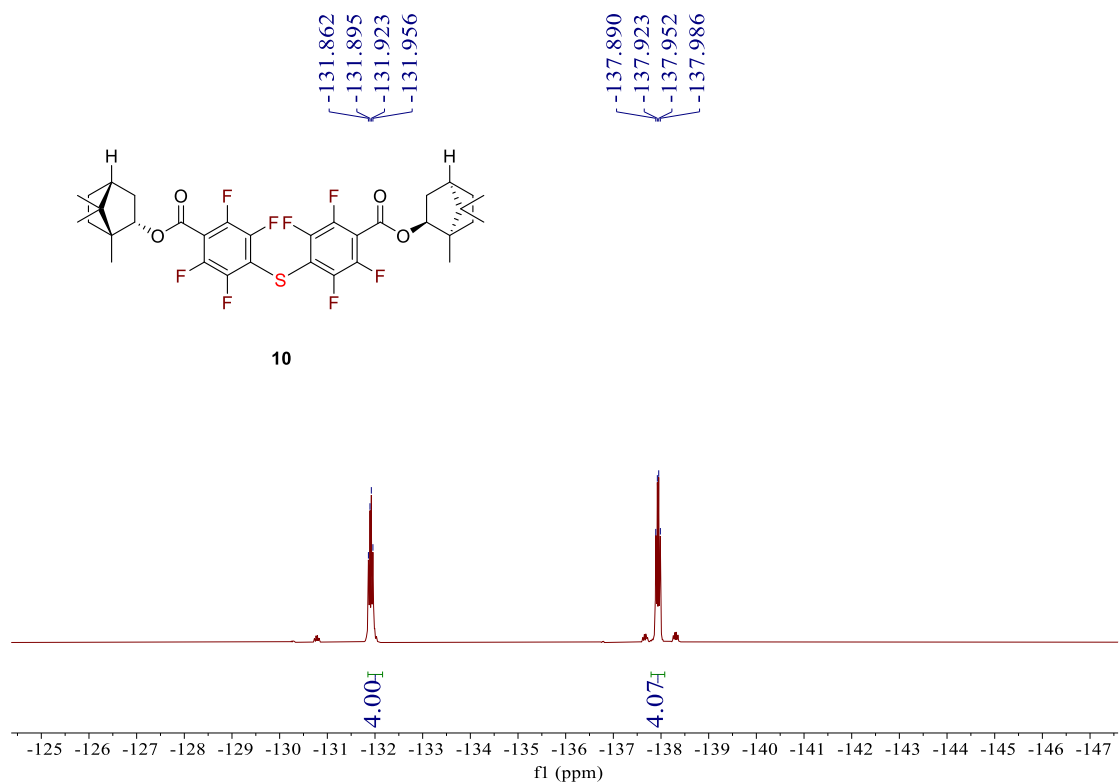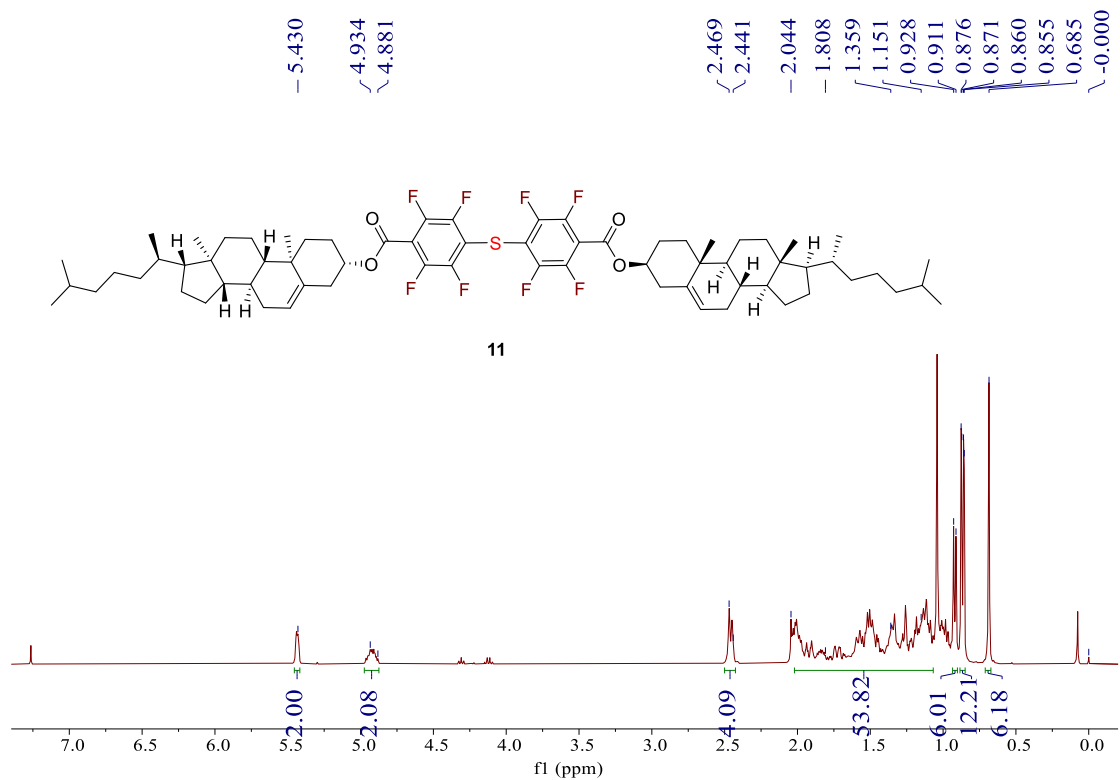

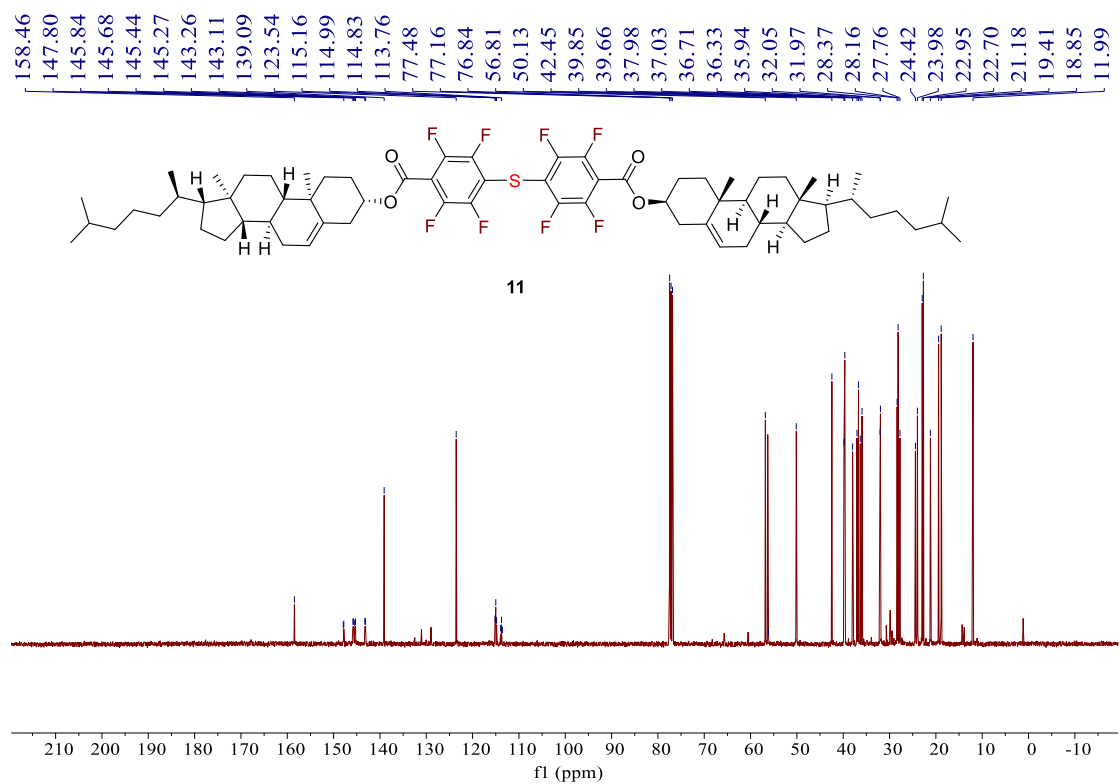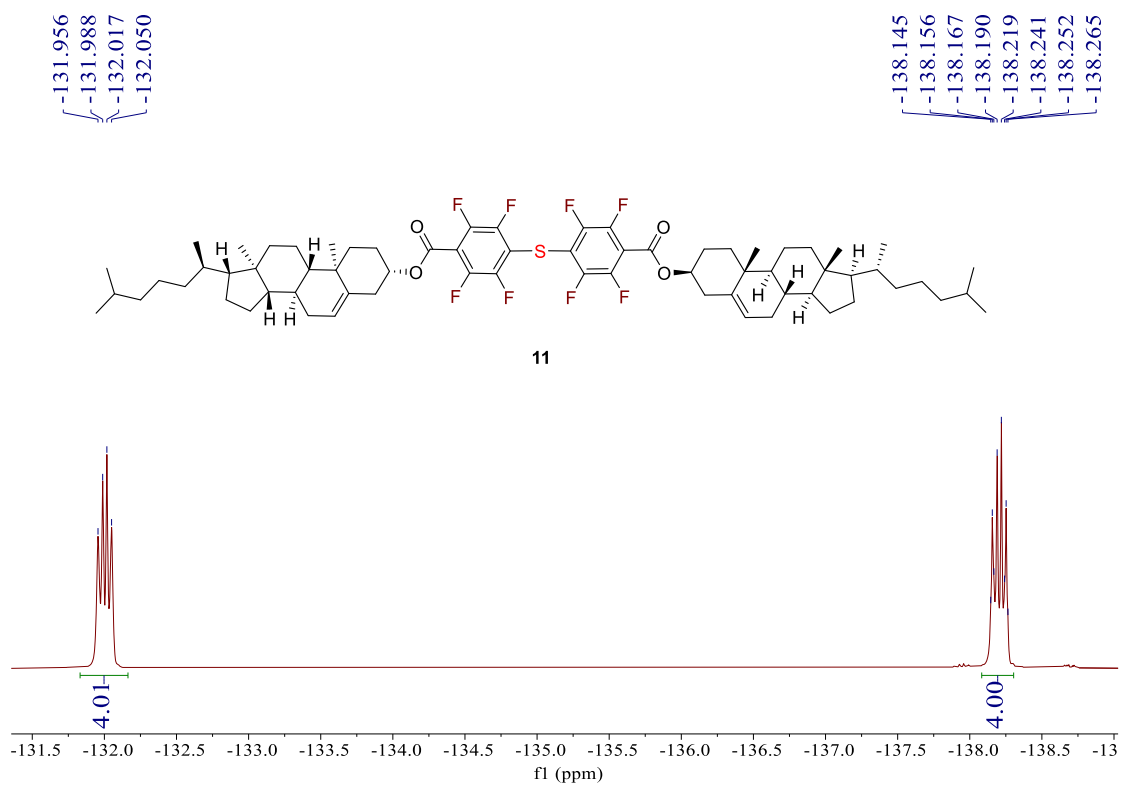

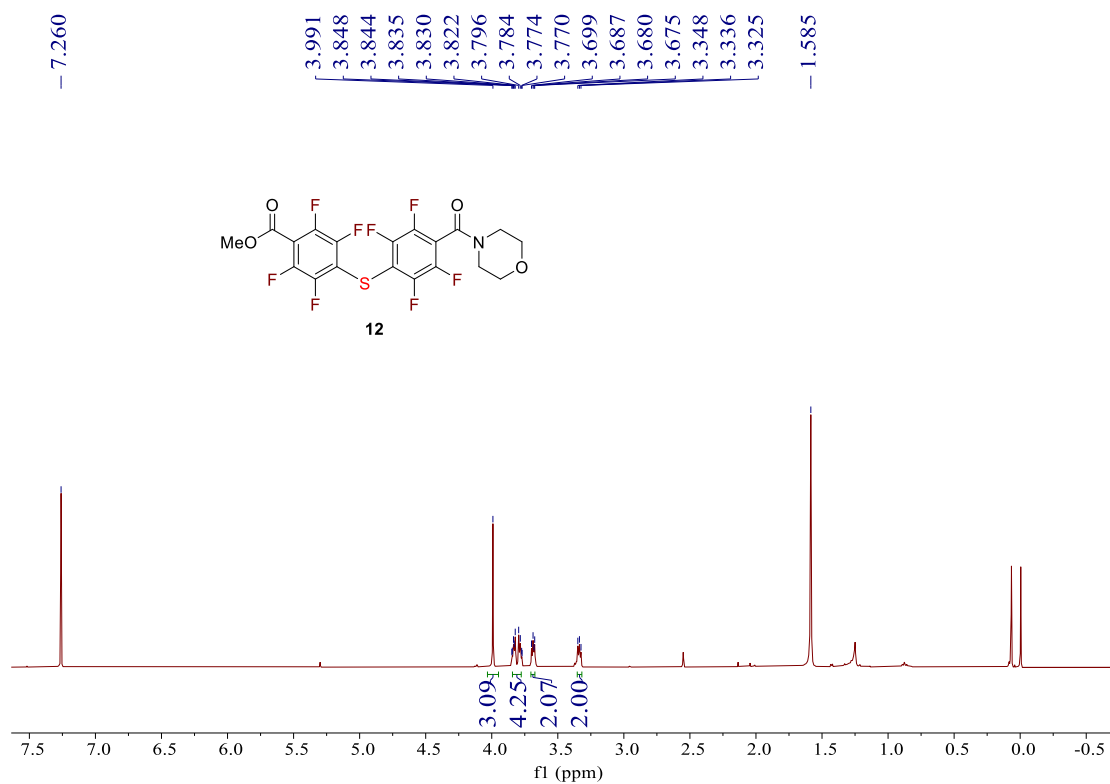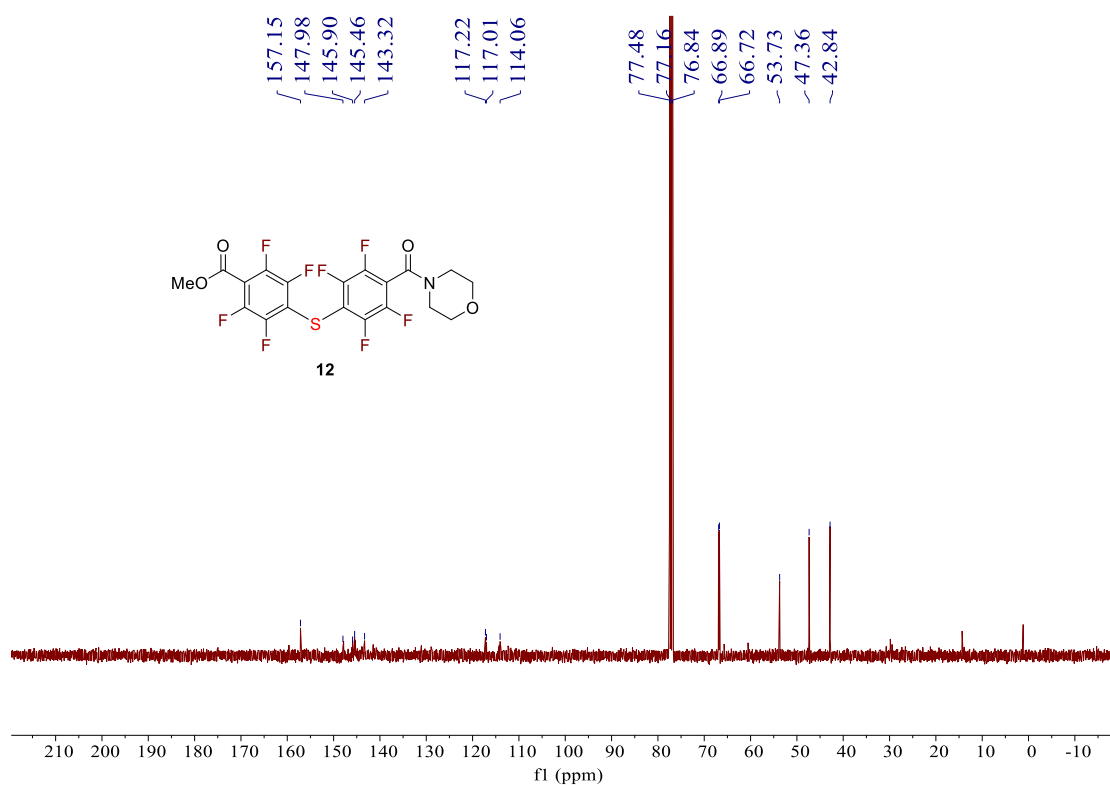

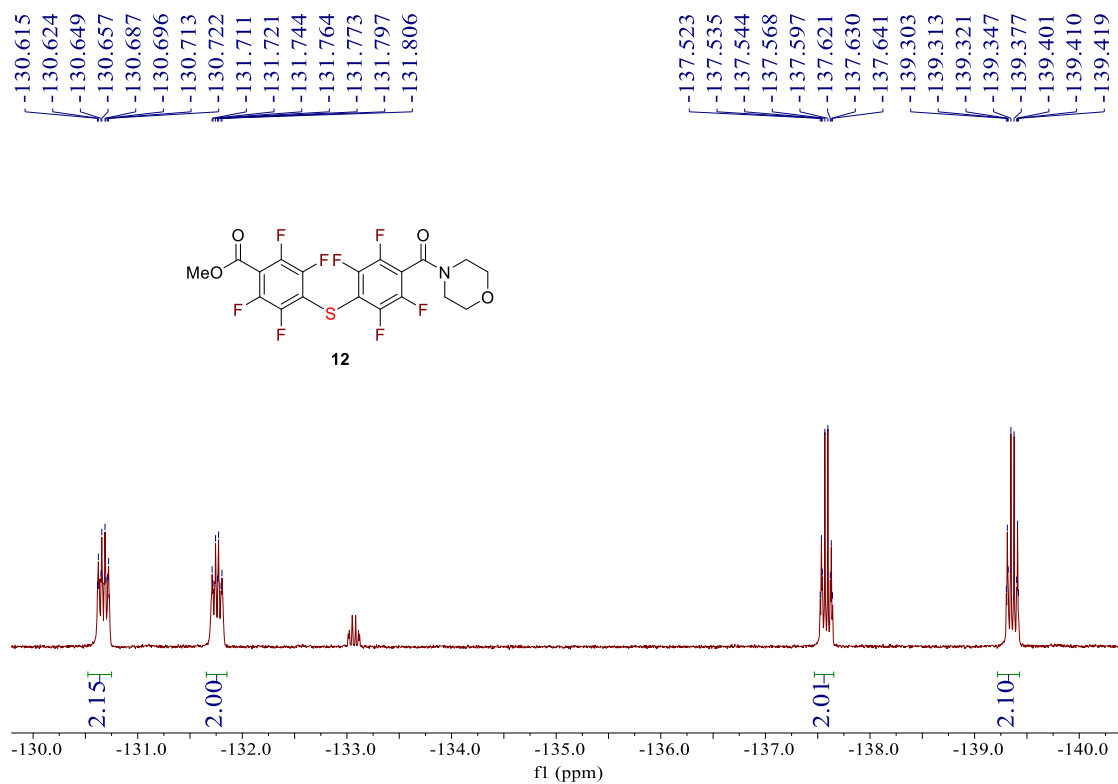

Supplement: d4qo01276c1.pdf [file d4qo01276c1.pdf]
